# Supplementary material for: Gene-specific mechanisms direct glucocorticoid-receptor-driven repression of inflammatory response genes in macrophages
Source: eLife. 2018 Feb 9;7:e34864. doi: 10.7554/eLife.34864 (PMC5821458; doi:10.7554/eLife.34864)
Supplement: Figure 3—figure supplement 1—source data 1. [file elife-34864-fig3-figsupp1-data1.xlsx]

## Sheet: Fig3 - Fig suppl 1C
	RNA-seq baselines in wt vs NELF-B KO
	WT1	WT2	AVE		KO1	KO2	AVE
	5.06	6.177	5.6185	Tnf	6.051	5.257	5.654
	3.696	5.031	4.3635	Myc	4.649	3.732	4.1905
	3.281	3.633	3.457	Errfi1	3.958	4.147	4.0525
	2.957	3.086	3.0215	Ccl2	3.171	3.06	3.1155
	1.878	2.145	2.0115	Il1b	1.322	1.873	1.5975
	0.075	-0.211	-0.068	Lif	-0.374	-0.035	-0.2045
