# Supplementary material for: Gene-specific mechanisms direct glucocorticoid-receptor-driven repression of inflammatory response genes in macrophages
Source: eLife. 2018 Feb 9;7:e34864. doi: 10.7554/eLife.34864 (PMC5821458; doi:10.7554/eLife.34864)
Supplement: Figure 3—source data 1. [file elife-34864-fig3-data1.xlsx]

## Sheet: Fig3C.
Figure 3C
NELF WT/KO Data
					Avg	SD	b-actin
112-WT	Lif	Contol	34.1353	33.9515	34.0434	0.129931	20.8397	13.2037	1
112-WT	Lif	LPS 30min	33.9722	33.2164	33.5943	0.534438	20.7166	12.8778	1.25343	1.07341
112-WT	Lif	L+D 30min	33.7992	33.4251	33.6121	0.264504	20.6322	12.98	1.16771
112-WT	Lif	LPS 1hr	30.0168	29.5281	29.7725	0.345579	20.5523	9.22022	15.8174	4.91293
112-WT	Lif	L+D 1hr	32.2938	32.488	32.3909	0.137295	20.8741	11.5168	3.21954
187-WT	Lif	Contol	32.9046	32.6318	32.7682	0.192875	20.6928	12.0754	1
187-WT	Lif	LPS 30min	32.8225		32.8225	#DIV/0!	20.3728	12.4497	0.771441	1.46943
187-WT	Lif	L+D 30min	33.7976		33.7976	#DIV/0!	20.7926	13.005	0.524993
187-WT	Lif	LPS 1hr	30.0824	29.6861	29.8843	0.280192	20.4178	9.4665	6.10023	2.00147
187-WT	Lif	L+D 1hr	30.9272	31.1122	31.0197	0.130853	20.5522	10.4676	3.04787
32-WT	Lif	Contol		34.5988	34.5988	#DIV/0!	20.3329	14.2659	1
32-WT	Lif	LPS 30min	35.1316	35.423	35.2773	0.206103	20.8459	14.4315	0.891583	0.923726
32-WT	Lif	L+D 30min	35.2347		35.2347	#DIV/0!	20.9177	14.317	0.965202
32-WT	Lif	LPS 1hr	31.1593		31.1593	#DIV/0!	21.3087	9.85059	21.3373	2.1688
32-WT	Lif	L+D 1hr	32.0461	32.1861	32.1161	0.0990431	21.1486	10.9675	9.8383
140-KO	Lif	Contol	33.9015	34.2238	34.0626	0.22789	21.0035	13.0592	1
140-KO	Lif	LPS 30min		34.6982	34.6982	#DIV/0!	21.0235	13.6747	0.652681	0.593545
140-KO	Lif	L+D 30min		33.8709	33.8709	#DIV/0!	20.9487	12.9222	1.09963
140-KO	Lif	LPS 1hr	30.4757	30.9282	30.702	0.320007	20.5847	10.1173	7.68441	1.20808
140-KO	Lif	L+D 1hr	31.1727	31.3471	31.2599	0.123317	20.8699	10.39	6.36086
127-KO	Lif	Contol	33.2042		33.2042	#DIV/0!	20.7968	12.4074	1
127-KO	Lif	LPS 30min	32.5252	32.4548	32.49	0.0497778	20.427	12.063	1.26968	2.39083
127-KO	Lif	L+D 30min	33.5426	33.8065	33.6745	0.186601	20.354	13.3205	0.531061
127-KO	Lif	LPS 1hr	28.6532	28.9967	28.8249	0.242871	20.3555	8.46945	15.3269	1.69017
127-KO	Lif	L+D 1hr	29.5496	29.9732	29.7614	0.299543	20.5347	9.22662	9.06825
133-KO	Lif	Contol	34.2151		34.2151	#DIV/0!	20.9596	13.2555	1
133-KO	Lif	LPS 30min	34.8999	34.4011	34.6505	0.352696	20.7765	13.874	0.651333	2.2937
133-KO	Lif	L+D 30min	35.9388		35.9388	#DIV/0!	20.8671	15.0717	0.283966
133-KO	Lif	LPS 1hr	29.4045	30.0175	29.711	0.433464	20.9515	8.75951	22.5646	4.01442
133-KO	Lif	L+D 1hr	31.4013	31.8046	31.6029	0.285204	20.8382	10.7647	5.62088
177-KO	Lif	Contol	31.3029	31.8325	31.5677	0.374492	21.1286	10.4392	1
177-KO	Lif	LPS 30min	31.6815		31.6815	#DIV/0!	21.4956	10.1858	1.19195	1.55871
177-KO	Lif	L+D 30min	31.9983	32.0134	32.0058	0.010675	21.1796	10.8262	0.764707
177-KO	Lif	LPS 1hr	29.2393		29.2393	#DIV/0!	21.5228	7.71647	6.60103	4.52786
177-KO	Lif	L+D 1hr	30.8551	30.9631	30.9091	0.0763553	21.0138	9.8953	1.45787
186-KO	Lif	Contol	33.8215	33.3221	33.5718	0.353122	21.0798	12.492	1
186-KO	Lif	LPS 30min	31.5655	32.0585	31.812	0.348621	20.7938	11.0182	2.77745	1.54172
186-KO	Lif	L+D 30min	32.6525		32.6525	#DIV/0!	21.0097	11.6428	1.80152
186-KO	Lif	LPS 1hr	28.6987	29.0694	28.884	0.262078	20.8365	8.04752	21.7734	2.6271
186-KO	Lif	L+D 1hr	30.6212		30.6212	#DIV/0!	21.1802	9.44099	8.288
198-WT	Lif	Contol	33.0183	33.1801	33.0992	0.114402	21.5611	11.538	1
198-WT	Lif	LPS 30min	32.661		32.661	#DIV/0!	21.4214	11.2396	1.22983	1.60413
198-WT	Lif	L+D 30min	33.3399	33.6824	33.5112	0.242156	21.5898	11.9214	0.76666
198-WT	Lif	LPS 1hr	30.5805	30.3476	30.464	0.164673	20.9356	9.52841	4.02682	2.07084
198-WT	Lif	L+D 1hr	31.9013	31.8347	31.868	0.0471047	21.2894	10.5786	1.94453
185-KO	Lif	Contol	34.2309	33.924	34.0775	0.216965	21.3509	12.7266	1
185-KO	Lif	LPS 30min	33.5304	32.9994	33.2649	0.375481	21.271	11.9939	1.6617	2.23306
185-KO	Lif	L+D 30min	34.8052	34.235	34.5201	0.403188	21.3671	13.1529	0.744138
185-KO	Lif	LPS 1hr	30.2123	30.0322	30.1222	0.127378	21.2093	8.91289	14.0614	2.81238
185-KO	Lif	L+D 1hr	31.5257	31.113	31.3194	0.291792	20.9147	10.4047	4.99983
32-WT	Ccl2.	Control	28.7713	28.7733	28.7723	0.00136084	20.3329	8.4394	1
32-WT	Ccl2.	LPS 30min	26.991	27.1564	27.0737	0.116936	20.8459	6.22787	4.63166	1.84811
32-WT	Ccl2.	L+D 30min	27.7714	28.2918	28.0316	0.367993	20.9177	7.11392	2.50617
32-WT	Ccl2.	LPS 1hr	24.1489	24.4605	24.3047	0.220278	21.3087	2.99602	43.5132	1.89904
32-WT	Ccl2.	L+D 1hr	24.9558	25.184	25.0699	0.161364	21.1486	3.92129	22.9133
140-KO	Ccl2.	Control	29.2293	29.1621	29.1957	0.0475106	21.0035	8.19226	0	1
140-KO	Ccl2.	LPS 30min	27.7604	28.0725	27.9164	0.220624	21.0235	6.89298	-1.29928	2.46106	1.56684
140-KO	Ccl2.	L+D 30min	28.5683	28.4108	28.4895	0.111361	20.9487	7.54084	-0.65142	1.57071
140-KO	Ccl2.	LPS 1hr	24.4356	24.6633	24.5495	0.160962	20.5847	3.96475	-4.22751	18.733	1.57463
140-KO	Ccl2.	L+D 1hr	25.3177	25.6616	25.4897	0.243179	20.8699	4.61976	-3.5725	11.8968
127-KO	Ccl2.	Control	28.5818	28.8188	28.7003	0.167638	20.7968	7.90355	0	1
127-KO	Ccl2.	LPS 30min	26.8309	26.9578	26.8944	0.0897168	20.427	6.46732	-1.43622	2.70612	1.39185
127-KO	Ccl2.	L+D 30min	27.1024	27.4943	27.2984	0.277163	20.354	6.94433	-0.959216	1.94425
127-KO	Ccl2.	LPS 1hr	23.8526	24.0015	23.927	0.105286	20.3555	3.57156	-4.33199	20.14	1.74931
127-KO	Ccl2.	L+D 1hr	24.7903	25.0359	24.9131	0.173641	20.5347	4.37834	-3.5252	11.5131
112-WT	Ccl2.	Control	28.3292	28.9142	28.6217	0.413607	20.8397	7.78195	0	1
112-WT	Ccl2.	LPS 30min	28.2782	28.5674	28.4228	0.204514	20.7166	7.70623	-0.0757208	1.05389	1.10743
112-WT	Ccl2.	L+D 30min	28.2924	28.6788	28.4856	0.273202	20.6322	7.85344	0.071496	0.951651
112-WT	Ccl2.	LPS 1hr	24.4629	24.8614	24.6622	0.281834	20.5523	4.10989	-3.67205	12.7467	1.87846
112-WT	Ccl2.	L+D 1hr	25.7403	26.0468	25.8936	0.216771	20.8741	5.01944	-2.76251	6.78574
133-KO	Ccl2.	Control	28.7523	28.2983	28.5253	0.321017	20.9596	7.56574	0	1
133-KO	Ccl2.	LPS 30min	26.3391		26.3391	#DIV/0!	20.7765	5.56257	-2.00317	4.0088	2.23828
133-KO	Ccl2.	L+D 30min	27.5921		27.5921	#DIV/0!	20.8671	6.72496	-0.840779	1.79102
133-KO	Ccl2.	LPS 1hr	24.433	24.752	24.5925	0.225509	20.9515	3.64104	-3.9247	15.1863	1.6912
133-KO	Ccl2.	L+D 1hr	25.394	25.0806	25.2373	0.22163	20.8382	4.39909	-3.16665	8.97959
186-KO	Ccl2.	Control	29.0574	29.2008	29.1291	0.101371	21.0798	8.04935	0	1
186-KO	Ccl2.	LPS 30min	28.5864	28.4471	28.5167	0.0984442	20.7938	7.72297	-0.32638	1.25386	1.344
186-KO	Ccl2.	L+D 30min	29.1358	29.1825	29.1592	0.0330269	21.0097	8.1495	0.10015	0.932936
186-KO	Ccl2.	LPS 1hr	25.379	25.2816	25.3303	0.068874	20.8365	4.49378	-3.55556	11.7579	1.5025
186-KO	Ccl2.	L+D 1hr	26.5098	26.0129	26.2614	0.35142	21.1802	5.08115	-2.96819	7.82555
187-WT	Ccl2.	Control	27.6847	27.5501	27.6174	0.0951575	20.6928	6.92459	0	1
187-WT	Ccl2.	LPS 30min	25.899	25.8403	25.8696	0.0414887	20.3728	5.49689	-1.4277	2.69018	1.50879
187-WT	Ccl2.	L+D 30min	26.8922	26.8735	26.8828	0.0132739	20.7926	6.09028	-0.834311	1.783
187-WT	Ccl2.	LPS 1hr	23.818	23.6101	23.7141	0.146988	20.4178	3.29629	-3.6283	12.3659	1.50383
187-WT	Ccl2.	L+D 1hr	24.5426	24.3316	24.4371	0.149147	20.5522	3.88493	-3.03966	8.22295
177-KO	Ccl2.	Control	29.2317	28.6676	28.9497	0.398839	21.1286	7.82111	0	1
177-KO	Ccl2.	LPS 30min	28.1657	28.3143	28.24	0.105072	21.4956	6.74433	-1.07678	2.10933	1.38521
177-KO	Ccl2.	L+D 30min	28.3554	28.4327	28.3941	0.0546183	21.1796	7.21443	-0.606673	1.52274
177-KO	Ccl2.	LPS 1hr	25.5158	25.3933	25.4545	0.0865946	21.5228	3.93169	-3.88942	14.8195	1.60821
177-KO	Ccl2.	L+D 1hr	25.6269	25.635	25.631	0.00566993	21.0138	4.61714	-3.20397	9.21488
185-KO	Ccl2.	Control	29.3736	29.3696	29.3716	0.00278102	20.867	8.50457	0	1
185-KO	Ccl2.	LPS 30min	27.3745	27.7386	27.5565	0.257399	21.5194	6.03711	-2.46746	5.53068	1.99347
185-KO	Ccl2.	L+D 30min	27.8616	28.249	28.0553	0.273915	21.0229	7.03239	-1.47218	2.7744
185-KO	Ccl2.	LPS 1hr	24.9013	25.2355	25.0684	0.23636	21.0672	4.00116	-4.5034	22.6809	1.55402
185-KO	Ccl2.	L+D 1hr	25.5663	25.8742	25.7203	0.217719	21.0831	4.63716	-3.8674	14.595
198-WT	Ccl2.	Control	28.4424	28.2544	28.3484	0.132895	21.0726	7.27577	0	1
198-WT	Ccl2.	LPS 30min	27.6231	27.7004	27.6618	0.0546075	20.9685	6.6933	-0.582471	1.49741	1.25513
198-WT	Ccl2.	L+D 30min	27.6711	27.5051	27.5881	0.117437	20.567	7.02114	-0.25464	1.19304
198-WT	Ccl2.	LPS 1hr	24.422	24.3688	24.3954	0.0375572	20.8193	3.57607	-3.6997	12.9933	1.97273
198-WT	Ccl2.	L+D 1hr	25.265	25.3892	25.3271	0.0878044	20.7708	4.55627	-2.71951	6.58649
32-WT	Myc	Control	36.4487		36.4487	#DIV/0!	20.3329	16.1158	1
32-WT	Myc	LPS 30min	32.8476	32.8318	32.8397	0.0111645	20.8459	11.9938	17.4112	1.20331
32-WT	Myc	L+D 30min	33.3541	33.003	33.1786	0.248266	20.9177	12.2608	14.4694
32-WT	Myc	LPS 1hr	32.4979	32.7892	32.6436	0.205992	21.3087	11.3349	27.4907	1.49429
32-WT	Myc	L+D 1hr	32.8486	33.2774	33.063	0.303185	21.1486	11.9144	18.3971
140-KO	Myc	Control	35.3107	35.2488	35.2798	0.0437707	21.0035	14.2763	0	1
140-KO	Myc	LPS 30min	33.7779	33.9395	33.8587	0.114259	21.0235	12.8352	-1.44115	2.71537	0.532529
140-KO	Myc	L+D 30min	32.8748		32.8748	#DIV/0!	20.9487	11.9261	-2.35022	5.09901
140-KO	Myc	LPS 1hr	32.0847	32.4003	32.2425	0.223134	20.5847	11.6578	-2.61853	6.14125	1.48718
140-KO	Myc	L+D 1hr	33.0994	33.1012	33.1003	0.00125429	20.8699	12.2304	-2.04596	4.12947
133-KO	Myc	Control	34.9399		34.9399	#DIV/0!	20.9596	13.9803	0	1
133-KO	Myc	LPS 30min	32.5394	32.7082	32.6238	0.119344	20.7765	11.8473	-2.133	4.38629	1.15252
133-KO	Myc	L+D 30min	32.9692	32.8693	32.9193	0.0706206	20.8671	12.0521	-1.92821	3.80583
133-KO	Myc	LPS 1hr	32.4432	32.5477	32.4955	0.0739384	20.9515	11.544	-2.43635	5.41269	1.44971
133-KO	Myc	L+D 1hr	32.8996	32.9364	32.918	0.0260137	20.8382	12.0798	-1.90058	3.73364
127-KO	Myc	Control	35.4644	35.8984	35.6814	0.306848	20.7968	14.8846	0	1
127-KO	Myc	LPS 30min	32.909	33.1658	33.0374	0.181594	20.427	12.6104	-2.27429	4.8376	1.02891
127-KO	Myc	L+D 30min	33.05	32.961	33.0055	0.0629896	20.354	12.6515	-2.23317	4.70165
127-KO	Myc	LPS 1hr	32.0772	32.2331	32.1552	0.110267	20.3555	11.7997	-3.08498	8.48538	1.61287
127-KO	Myc	L+D 1hr	32.931	33.1171	33.024	0.131536	20.5347	12.4893	-2.39535	5.26105
112-WT	Myc	Control	34.6668	35.2548	34.9608	0.415815	20.8397	14.1211	0	1
112-WT	Myc	LPS 30min	32.7544	33.3112	33.0328	0.393726	20.7166	12.3163	-1.8048	3.4938	1.57848
112-WT	Myc	L+D 30min	33.4481	33.7659	33.607	0.22468	20.6322	12.9748	-1.14626	2.21339
112-WT	Myc	LPS 1hr	32.231	32.6051	32.4181	0.264582	20.5523	11.8658	-2.25528	4.77428	1.81068
112-WT	Myc	L+D 1hr	33.404	33.7889	33.5964	0.272122	20.8741	12.7223	-1.39875	2.63674
186-KO	Myc.	Control	36.0549	36.2782	36.1665	0.157903	21.0798	15.0868	0	1
186-KO	Myc.	LPS 30min	34.5286	34.048	34.2883	0.339851	20.7938	13.4945	-1.59226	3.01521	1.01775
186-KO	Myc.	L+D 30min	34.6529	34.4063	34.5296	0.174379	21.0097	13.5199	-1.56688	2.96263
186-KO	Myc.	LPS 1hr	33.4995	33.1449	33.3222	0.250747	20.8365	12.4857	-2.6011	6.06748	0.768466
186-KO	Myc.	L+D 1hr	33.4021	33.1697	33.2859	0.164366	21.1802	12.1057	-2.98104	7.89557
187-WT	Myc.	Control	36.0672	35.9135	35.9904	0.108686	20.6928	15.2975	0	1
187-WT	Myc.	LPS 30min	32.7781	32.5006	32.6394	0.196179	20.3728	12.2666	-3.03094	8.17344	1.19791
187-WT	Myc.	L+D 30min	33.331	33.3083	33.3197	0.0160468	20.7926	12.5271	-2.77043	6.8231
187-WT	Myc.	LPS 1hr	32.2159	32.0916	32.1538	0.0878947	20.4178	11.736	-3.56154	11.8068	1.40221
187-WT	Myc.	L+D 1hr	32.8569	32.6948	32.7759	0.114634	20.5522	12.2237	-3.07384	8.4201
177-KO	Myc.	Control	35.9335	36.0252	35.9794	0.0648455	21.1286	14.8508	0	1
177-KO	Myc.	LPS 30min	33.714	34.1095	33.9117	0.279693	21.4956	12.4161	-2.43471	5.40654	1.27599
177-KO	Myc.	L+D 30min	33.7299	34.1648	33.9473	0.307563	21.1796	12.7677	-2.08309	4.23713
177-KO	Myc.	LPS 1hr	33.1264	32.9264	33.0264	0.141441	21.5228	11.5036	-3.34725	10.177	1.2051
177-KO	Myc.	L+D 1hr	32.8156	32.7574	32.7865	0.041138	21.0138	11.7727	-3.07809	8.44497
185-KO	Myc.	Control	35.6234	35.9389	35.7812	0.223102	20.867	14.9142	0	1
185-KO	Myc.	LPS 30min		33.8879	33.8879	#DIV/0!	21.5194	12.3685	-2.54567	5.83879	2.73712
185-KO	Myc.	L+D 30min		34.8441	34.8441	#DIV/0!	21.0229	13.8211	-1.09301	2.13319
185-KO	Myc.	LPS 1hr	32.7206	33.2833	33.002	0.397874	21.0672	11.9347	-2.97943	7.88676	1.04813
185-KO	Myc.	L+D 1hr	32.8373	33.334	33.0856	0.351261	21.0831	12.0025	-2.91161	7.52458
198-WT	Myc.	Control	36.3041	35.6277	35.9659	0.478276	21.0726	14.8933	0	1
198-WT	Myc.	LPS 30min	33.4711	33.8488	33.66	0.267056	20.9685	12.6915	-2.20179	4.60049	1.26842
198-WT	Myc.	L+D 30min	33.3213	33.8818	33.6015	0.396329	20.567	13.0346	-1.85876	3.62695
198-WT	Myc.	LPS 1hr	32.1105	32.2338	32.1722	0.0872015	20.8193	11.3528	-3.54046	11.6355	1.61059
198-WT	Myc.	L+D 1hr	32.7912	32.8314	32.8113	0.028409	20.7708	12.0404	-2.85287	7.22436
KO 140.	TNFa	Control	23.7999	23.3951	23.5975	0.286263	16.983	6.6145	0.996885
KO 140.	TNFa	LPS 30min	19.2681	19.2415	19.2548	0.0188224	17.0638	2.19097	21.3925	2.56241
KO 140.	TNFa	L+D 30min	20.3283	20.6807	20.5045	0.249175	16.956	3.54847	8.34857
KO 140.	TNFa	LPS 1hr	17.8397	18.0458	17.9428	0.145735	17.2848	0.657936	61.9084	2.05385
KO 140.	TNFa	L+D 1hr	18.5904	18.8553	18.7229	0.187298	17.0266	1.69627	30.1427
KO 127.	TNFa	Control	22.7984	23.3642	23.0813	0.400096	16.6785	6.4028	0.998061
KO 127.	TNFa	LPS 30min	18.5177	18.7289	18.6233	0.149319	16.5486	2.07476	20.046	1.5582
KO 127.	TNFa	L+D 30min	19.2929	19.5135	19.4032	0.155978	16.6886	2.71464	12.8649
KO 127.	TNFa	LPS 1hr	17.2449	17.8531	17.549	0.430056	16.7862	0.762803	49.7697	2.29846
KO 127.	TNFa	L+D 1hr	19.1851	18.8199	19.0025	0.258261	17.039	1.96347	21.6535
WT 112.	TNFa	Control	23.3226	23.3302	23.3264	0.00537591	16.7343	6.59211	0.998541
WT 112.	TNFa	LPS 30min	19.1505	19.146	19.1482	0.00320856	16.7944	2.35389	18.845	3.64331
WT 112.	TNFa	L+D 30min	21.3952	20.7361	21.0657	0.466085	16.8465	4.21914	5.1725
WT 112.	TNFa	LPS 1hr	17.4712	18.1899	17.8305	0.50813	16.5141	1.31643	38.6813	1.86588
WT 112.	TNFa	L+D 1hr	18.823	18.9396	18.8813	0.0824918	16.665	2.21629	20.7309
KO 133.	TNFa	Control	23.4424	23.5182	23.4803	0.0536243	16.6891	6.79121	0.999163
KO 133.	TNFa	LPS 30min	18.696	18.9516	18.8238	0.180736	16.6499	2.17388	24.5239	2.22393
KO 133.	TNFa	L+D 30min	20.3193	20.0201	20.1697	0.211616	16.8427	3.32699	11.0273
KO 133.	TNFa	LPS 1hr	18.15	17.9892	18.0696	0.11371	16.5645	1.50509	38.9867	1.5932
KO 133.	TNFa	L+D 1hr	18.9283	18.959	18.9436	0.0216884	16.7666	2.17702	24.4707
32-WT	TNFa	Control	29.7381	29.5887	29.6634	0.105638	18.1225	11.5409	0.999389
32-WT	TNFa	LPS 30min	24.7004	24.6344	24.6674	0.0466488	18.1318	6.53562	32.0972	2.15011
32-WT	TNFa	L+D 30min	25.6515	25.8575	25.7545	0.145662	18.1144	7.64003	14.9282
32-WT	TNFa	LPS 1hr	23.9126	24.0595	23.986	0.103904	18.1736	5.81244	52.9869	1.14879
32-WT	TNFa	L+D 1hr	24.5414	24.3839	24.4627	0.111346	18.4501	6.01255	46.124
186-KO	TNFa	Control	30.424	30.0919	30.2579	0.234811	17.7672	12.4907	0.999485
186-KO	TNFa	LPS 30min	25.299	25.817	25.558	0.36623	17.7131	7.84489	25.0218	1.45714
186-KO	TNFa	L+D 30min	26.0749		26.0749	#DIV/0!	17.6868	8.38803	17.1718
186-KO	TNFa	LPS 1hr	23.4146	23.3764	23.3955	0.0269591	17.6529	5.74257	107.443	2.61374
186-KO	TNFa	L+D 1hr	25.0265	24.9157	24.9711	0.0783459	17.8424	7.12869	41.1071
187-WT	TNFa	Control	30.0564	29.9205	29.9885	0.0960638	17.3261	12.6624	0.998346
187-WT	TNFa	LPS 30min	24.1008	24.0519	24.0763	0.0345887	17.2659	6.81039	57.6643	2.19083
187-WT	TNFa	L+D 30min	25.0615	25.4021	25.2318	0.240864	17.29	7.94187	26.3208
187-WT	TNFa	LPS 1hr	23.2971	23.2957	23.2964	0.000919813	17.0855	6.21094	87.3698	1.6438
187-WT	TNFa	L+D 1hr	24.7456	24.0746	24.4101	0.474501	17.4821	6.92797	53.151
177-KO	TNFa	Control	30.656	30.4335	30.5447	0.157362	18.4022	12.1426	0.998223
177-KO	TNFa	LPS 30min	25.4885	25.4504	25.4694	0.0269605	18.0591	7.41035	26.5318	1.68343
177-KO	TNFa	L+D 30min	26.4381		26.4381	#DIV/0!	18.2763	8.16175	15.7606
177-KO	TNFa	LPS 1hr	24.5354	24.4617	24.4986	0.0521528	17.9798	6.51881	49.2205	1.07066
177-KO	TNFa	L+D 1hr	24.4105	24.8909	24.6507	0.339717	18.0334	6.61731	45.9723
185-KO	TNFa	Control	31.0716	31.3569	31.2143	0.201701	17.3778	13.8364	0.995553
185-KO	TNFa	LPS 30min	25.0512	25.2211	25.1362	0.120127	17.3546	7.7816	66.1833	1.3171
185-KO	TNFa	L+D 30min	25.7626	25.6099	25.6863	0.10802	17.5073	8.17897	50.2491
185-KO	TNFa	LPS 1hr	24.4637	23.9653	24.2145	0.352454	17.4027	6.81176	129.629	2.35773
185-KO	TNFa	L+D 1hr	25.2472	25.6732	25.4602	0.30117	17.411	8.04916	54.9804
198-WT	TNFa	Control	29.9613	30.7376	30.3494	0.548943	17.302	13.0474	0.994882
198-WT	TNFa	LPS 30min	24.417		24.417	#DIV/0!	17.4211	6.99588	65.9876	3.00042
198-WT	TNFa	L+D 30min	26.5883	27.1294	26.8589	0.382584	18.2778	8.58104	21.9928
198-WT	TNFa	LPS 1hr	24.9962	25.2247	25.1105	0.161623	17.5129	7.59752	43.486	1.34206
198-WT	TNFa	L+D 1hr		25.5241	25.5241	#DIV/0!	17.5022	8.02197	32.4025
KO 140.	IL1b.	Control	27.1312	27.9744	27.5528	0.596197	16.983	10.5698	0.993208
KO 140.	IL1b.	LPS 30min	23.7687	24.2409	24.0048	0.333854	17.0638	6.94099	12.2866	2.51867
KO 140.	IL1b.	L+D 30min	24.6687	25.7907	25.2297	0.793371	16.956	8.27365	4.87821
KO 140.	IL1b.	LPS 1hr	19.9109	20.0005	19.9557	0.0633592	17.2848	2.67086	237.065	2.71088
KO 140.	IL1b.	L+D 1hr	20.9449	21.3275	21.1362	0.270552	17.0266	4.10962	87.4495
KO 140.	IL1b.	LPS 3hr	21.1505	20.7947	20.9726	0.251565	16.6723	4.30032	76.6216
KO 140.	IL1b.	LPS 6hr	20.7834	20.3257	20.5545	0.323666	16.3186	4.23598	80.1161
KO 127.	IL1b.	Control	28.871	28.6712	28.7711	0.141271	16.6785	12.0926	0.998212
KO 127.	IL1b.	LPS 30min	22.7954	22.9928	22.8941	0.139603	16.5486	6.34555	53.6108	3.18103
KO 127.	IL1b.	L+D 30min	24.66	24.7473	24.7036	0.0617691	16.6886	8.01504	16.8533
KO 127.	IL1b.	LPS 1hr	19.8113	19.5186	19.6649	0.206948	16.7862	2.8787	592.757	2.34899
KO 127.	IL1b.	L+D 1hr	20.997	21.3025	21.1498	0.216004	17.039	4.11075	252.345
KO 127.	IL1b.	LPS 3hr	20.5572	20.2043	20.3807	0.24957	16.7197	3.66104	344.644
KO 127.	IL1b.	LPS 6hr	20.4875	20.8864	20.687	0.282059	16.2205	4.46649	197.199
WT 112.	IL1b.	Control	26.919	27.8779	27.3984	0.678056	16.7343	10.6642	0.997109
WT 112.	IL1b.	LPS 30min	24.9224	24.8211	24.8717	0.0716146	16.7944	8.07736	5.99035	2.95185
WT 112.	IL1b.	L+D 30min	26.2921	26.679	26.4855	0.273588	16.8465	9.63898	2.02935
WT 112.	IL1b.	LPS 1hr	19.8162	19.9495	19.8828	0.0942916	16.5141	3.36873	156.636	3.32555
WT 112.	IL1b.	L+D 1hr	21.6732	21.8615	21.7673	0.133185	16.665	5.10232	47.1008
WT 112.	IL1b.	LPS 3hr	21.1363	21.2408	21.1885	0.0738912	16.3226	4.86592	55.4873
WT 112.	IL1b.	LPS 6hr	20.913	20.8702	20.8916	0.0302567	16.031	4.86058	55.6928
KO 133.	IL1b.	Control	28.0532	28.2528	28.153	0.141133	16.6891	11.4639	0.997314
KO 133.	IL1b.	LPS 30min	22.8861	22.8239	22.855	0.0439487	16.6499	6.2051	38.184	3.30846
KO 133.	IL1b.	L+D 30min	24.7112	24.8367	24.774	0.0887066	16.8427	7.93126	11.5413
KO 133.	IL1b.	LPS 1hr	19.7972	19.6522	19.7247	0.102504	16.5645	3.16018	315.134	4.81373
KO 133.	IL1b.	L+D 1hr	22.155	22.2329	22.1939	0.0550809	16.7666	5.42733	65.4657
KO 133.	IL1b.	LPS 3hr	21.3139	21.0968	21.2053	0.153478	16.3534	4.85194	97.5495
KO 133.	IL1b.	LPS 6hr	21.2475	21.2888	21.2681	0.0292641	16.0059	5.2622	73.4047
32-WT	IL1b	Control	28.131	28.2844	28.2077	0.108516	18.1225	10.0852	0.996407
32-WT	IL1b	LPS 30min	24.1687	23.9879	24.0783	0.127814	18.1318	5.9465	17.5512	3.53911
32-WT	IL1b	L+D 30min	25.885	25.8836	25.8843	0.00101287	18.1144	7.76989	4.95921
32-WT	IL1b	LPS 1hr	19.8141	19.6129	19.7135	0.142255	18.1736	1.5399	372.242	2.23475
32-WT	IL1b	L+D 1hr	21.3013	20.999	21.1501	0.213722	18.4501	2.70002	166.57
186-KO	IL1b	Control	27.9919	28.0333	28.0126	0.0292546	17.7672	10.2454	0.996266
186-KO	IL1b	LPS 30min	25.1527	25.5228	25.3377	0.261712	17.7131	7.62462	6.12783	2.35381
186-KO	IL1b	L+D 30min	26.3883	26.7047	26.5465	0.223713	17.6868	8.85962	2.60337
186-KO	IL1b	LPS 1hr	19.1097	19.4519	19.2808	0.242004	17.6529	1.62786	391.302	4.86582
186-KO	IL1b	L+D 1hr	21.747	21.759	21.753	0.00852513	17.8424	3.91055	80.4185
187-WT	IL1b	Control	28.3344	27.9975	28.166	0.238223	17.3261	10.8399	0.993168
187-WT	IL1b	LPS 30min	24.0749	24.0431	24.059	0.0224815	17.2659	6.79303	16.4153	3.38271
187-WT	IL1b	L+D 30min	25.8775	25.8048	25.8412	0.051403	17.29	8.55121	4.85271
187-WT	IL1b	LPS 1hr	19.8374	19.671	19.7542	0.117666	17.0855	2.66871	286.281	3.50412
187-WT	IL1b	L+D 1hr	22.0438	21.876	21.9599	0.11865	17.4821	4.47776	81.6985
177-KO	IL1b	Control	28.8164	28.749	28.7827	0.0476536	18.4022	10.3806	0.999611
177-KO	IL1b	LPS 30min	26.3274	26.3649	26.3462	0.0265181	18.0591	8.28706	4.26615	2.95249
177-KO	IL1b	L+D 30min	27.3847	28.866	28.1253	1.04745	18.2763	9.849	1.44493
177-KO	IL1b	LPS 1hr		21.0206	21.0206	#DIV/0!	17.9798	3.04084	161.923	3.09918
177-KO	IL1b	L+D 1hr	22.5234	22.8889	22.7061	0.258451	18.0334	4.67272	52.2471
185-KO	IL1b	Control	27.8954	28.1626	28.029	0.188943	17.3778	10.6512	0.999167
185-KO	IL1b	LPS 30min	22.9119	22.6901	22.801	0.15685	17.3546	5.44644	36.849	3.13817
185-KO	IL1b	L+D 30min	24.7933	24.414	24.6037	0.268233	17.5073	7.09637	11.7422
185-KO	IL1b	LPS 1hr	19.405	19.3297	19.3673	0.0532278	17.4027	1.96459	411.689	3.37714
185-KO	IL1b	L+D 1hr	21.2307	21.0322	21.1314	0.140352	17.411	3.72039	121.905
198-WT	IL1b	Control	29.4569	29.2428	29.3499	0.15137	17.302	12.0479	0.994561
198-WT	IL1b	LPS 30min	26.2407	26.1346	26.1876	0.0750254	17.4211	8.76648	9.67	1.22999
198-WT	IL1b	L+D 30min	26.7447	27.9412	27.3429	0.845999	18.2778	9.06513	7.86183
198-WT	IL1b	LPS 1hr	21.5269	20.6314	21.0792	0.633151	17.5129	3.56622	355.518	2.22375
198-WT	IL1b	L+D 1hr	21.8793	22.5635	22.2214	0.483786	17.5022	4.71922	159.873
Nelf expression											Avg
								Fold over WT			WT	KO
NELF	ko		27.2029	27.3285	27.2657	16.983	10.2827	0.224892			0.998627	0.135596
NELF	ko		27.8502	27.8576	27.8539	16.6785	11.1753	0.121133			0.00160315	0.0589258
NELF	wt		24.8355	24.9003	24.8679	16.7343	8.13362	0.997494
NELF	wt		24.8765	24.8195	24.848	16.9685	7.87952	1.18961
NELF	ko		27.2725	27.4548	27.3637	16.6891	10.6746	0.171397
NELF	ko		28.0287	28.0327	28.0307	17.1093	10.9214	0.14445
NELF	wt	24.99	24.9757	24.9828	0.010126	18.1225	6.86034	0.999761
NELF	ko	29.3263	29.5586	29.4425	0.164251	19.1756	10.2669	0.0942817
NELF	ko	29.6887	29.3863	29.5375	0.213824	18.5552	10.9823	0.0574218

## Sheet: Fig3E. CDK9 ChIP data
2017-03-30
		28s		Tnf TSS		Il1b TSS		Ccl2 TSS
Raw Data	U	27.2268	26.5783	33.6255	34.2025	37.7482	37.6387	35.5846	35.8863
	L	26.6811	27.3889	31.8115	32.0616	34.4829	34.3123	34.6698
	LD	27.4453	26.8145		32.2034	35.5803	35.5971	35.0028	35.553
		28s	SD	Tnf TSS	SD	Il1b TSS	SD	Ccl2 TSS	SD
	U	26.9025	0.45857	33.914	0.408014	37.6934	0.077472	35.7355	0.213313
Averages	L	27.035	0.500489	31.9366	0.176808	34.3123	0.12066	34.6698	#DIV/0!
	LD	27.1299	0.446025	32.2034	#DIV/0!	35.5971	0.011854	35.2779	0.389075
				Tnf TSS		Il1b TSS		Ccl2 TSS
	U			7.01148		10.7909		8.83294
Normalized	L			4.90157		7.27729		7.63476
to 28s	LD			5.07356		8.46717		8.14802
				Tnf TSS		Il1b TSS		Ccl2 TSS
	U			1		1		1
Occupancy	L			4.31663		11.4209		2.29449
vs U	LD			3.83152		5.00621		1.60761
2017-04-06
		28s		Tnf TSS		Il1b TSS		Ccl2 TSS
	U	29.9712	29.2106	37.1215		37.8598	37.6248
	L	29.7452	29.3379	34.1	34.5667	36.8305
	LD		28.6618	34.3961	34.575	37.9116	38.0679
Raw Data	U.1	26.3368	25.8916	35.2568	34.1751	36.2526	36.2739	36.9116
	L.1	26.3102	25.7185	33.2798	32.7683		34.6973	35.6952	34.9993
	LD.1	25.9346	25.5578		33.3821	36.3347	35.9752	35.1131	35.1064
		28s	SD	Tnf TSS	SD	Il1b TSS	SD	Ccl2 TSS	SD
	U	29.5909	0.537867	37.1215	#DIV/0!	37.7423	0.166135
	L	29.5416	0.288028	34.3334	0.329989	36.8305
	LD	28.6618	#DIV/0!	34.4855	0.126473	37.9897	0.110542
Averages
	U.1	26.1142	0.314821	34.7159	0.764847	36.2632	0.0150758	36.9116	#DIV/0!
	L.1	26.0144	0.418376	33.024	0.361681	34.6973	#DIV/0!	35.3473	0.492067
	LD.1	25.7462	0.266457	33.3821	#DIV/0!	36.155	0.254257	35.1097	0.00479058
				Tnf TSS		Il1b TSS		Ccl2 TSS
	U			7.53061		8.1514		9.04754
	L			4.7918		7.28897		8.26941
	LD			5.82372		9.32792		9.25338
Normalized
to 28s	U.1			8.60171		10.149		10.7974
	L.1			7.00963		8.68292		9.33291
	LD.1			7.63585		10.4088		9.36354
				Tnf TSS		Il1b TSS		Ccl2 TSS
	U			1		1
	L			6.67518		1.8181
	LD			3.26456		0.442417
Occupancy
vs U	U.1			1		1		1
	L.1			3.01483		2.76274		2.75964
	LD.1			1.95323		0.83524		2.70167
2017-04-29
		28s		Tnf TSS		Il1b TSS		Ccl2 TSS
	U	29.3322	28.7731	35.5612	34.9408	37.0479	37.0495	36.6371	35.7913
	L	29.7497	29.499	32.6956	32.9918	35.4737	34.9867	34.1205	34.0843
	LD	28.9744	28.9904		33.5335	35.1919	35.5349	34.6609	35.4064
Raw Data	U.1	28.8769	28.5768	34.764	35.4644	37.4403	38.3167	36.5039	37.1815
	L.1	30.163	29.728	34.1424	34.2088		35.773		35.4494
	LD.1	29.5351	29.1717	33.5088	33.9372	37.7177	36.1285	36.2487	35.1773
		28s	SD	Tnf TSS	SD	Il1b TSS	SD	Ccl2 TSS	SD
	U	29.0526	0.395378	35.251	0.438698	37.0495	#DIV/0!	36.2142	0.598019
	L	29.6244	0.177278	32.8437	0.20945	35.2302	0.344358	34.1024	0.0256145
	LD	28.9744	#DIV/0!	33.5335	#DIV/0!	35.3634	0.242488	35.0337	0.527166
Averages
	U.1	28.7269	0.212253	35.1142	0.495321	37.8785	0.619663	36.8427	0.479155
	L.1	29.9455	0.307578	34.1756	0.0469455	35.773	#DIV/0!	35.4494	#DIV/0!
	LD.1	29.3534	0.256966	33.723	0.302918	36.9231	1.12372	35.713	0.757589
				Tnf TSS		Il1b TSS		Ccl2 TSS
	U			6.19838		7.99689		7.16157
	L			3.21932		5.6058		4.47801
	LD			4.55911		6.38902		6.05928
Normalized
to 28s	U.1			6.38734		9.15164		8.11587
	L.1			4.23015		5.82751		5.50395
	LD.1			4.36953		7.56963		6.35952
				Tnf TSS		Il1b TSS		Ccl2 TSS
	U			1		1		1
	L			7.8847		5.24551		6.42438
	LD			3.11508		3.048		2.14695
Occupancy
vs U	U.1			1		1		1
	L.1			4.46047		10.0153		6.11318
	LD.1			4.04968		2.99387		3.37843
2017-05-04
		28s		Tnf TSS		Il1b TSS
Raw Data	U	30.4265	30.0547	37.2943	37.4135	39.9988	39.9588
	L	29.8654	29.8902	33.9516	33.8932	36.6798
	LD	28.8614	28.8982	33.737	33.9616	36.9749	36.121
		28s	SD	Tnf TSS	SD	Il1b TSS	SD
	U	30.2406	0.262879	37.3539	0.0843342	39.9788	0.0282777
Averages	L	29.8778	0.0175722	33.9224	0.0412891	36.6798	#DIV/0!
	LD	28.8798	0.0260412	33.8493	0.158817	36.5479	0.603818
				Tnf TSS		Il1b TSS
	U			7.11332		9.73822
Normalized	L			4.0446		6.80203
to 28s	LD			4.96949		7.66814
				Tnf TSS		Il1b TSS
	U			1		1
Occupancy	L			8.39029		7.6539
vs U	LD			4.41934		4.19909
2017-05-19
		28s		Tnf TSS		Il1b TSS		Ccl2 TSS
Raw Data	U	28.6278	28.5012	36.1518	35.8976	37.0626	37.7378	35.5381	34.9592
	L	28.0506	27.8724	34.4417	32.5928	33.9102	34.4404	33.8514
	LD	27.5837		34.0491	33.8041	34.6595	35.1246	33.7464	33.7967
		28s	SD	Tnf TSS	SD	Il1b TSS	SD	Ccl2 TSS	SD
	U	28.5645	0.0895186	36.0247	0.179755	37.4002	0.477461	35.2486	0.409275
Averages	L	27.9615	0.125971	33.5172	1.30734	34.1753	0.374917	33.8514	#DIV/0!
	LD	27.5837	#DIV/0!	33.9266	0.173216	34.8921	0.328929	33.7716	0.0355841
				Tnf TSS		Il1b TSS		Ccl2 TSS
	U			7.46025		8.83573		6.68418
Normalized	L			5.55576		6.21385		5.8899
to 28s	LD			6.34293		7.30839		6.18791
				Tnf TSS		Il1b TSS		Ccl2 TSS
	U			1		1		1
Occupancy	L			3.74378		6.15552		1.73422
vs U	LD			2.16945		2.88254		1.41057
2017-06-08
		28s		errfi1 TSS
	U	29.9326	29.4839	38.0784	38.7865
	L	29.738	29.5257	35.9237
	LD	28.8439	28.0706	35.5247	35.8813
	U.1	28.8879	28.6407		36.1488
	L.1	29.6658	29.5778	35.571	35.7617
Raw Data	LD.1	30.2384	29.7306	35.8635	36.4306
	U.2	29.4231	28.8212	36.1937	35.583
	L.2	28.7456	28.7288	34.976	34.4063
	LD.2	27.4373	27.2837	34.5075	33.7412
	U.3	25.2517	25.8886	33.4775	33.3148
	L.3	25.326	25.4374	30.7932
	LD.3	25.5437	25.4388	31.7112
		28s	SD	errfi1 TSS	SD
	U	29.7082	0.317302	38.4325	0.50071
	L	29.6318	0.150108	35.9237	#DIV/0!
	LD	28.4573	0.546814	35.703	0.252172
	U.1	28.7643	0.174773	36.1488	#DIV/0!
Average	L.1	29.6218	0.0622492	35.6663	0.134851
	LD.1	29.9845	0.359095	36.147	0.400998
	U.2	29.1221	0.425582	35.8884	0.431778
	L.2	28.7372	0.0119279	34.6911	0.402889
	LD.2	27.3605	0.108657	34.1243	0.541805
	U.3	25.5701	0.450406	33.3961	0.115025
	L.3	25.3817	0.0787789	30.7932	#DIV/0!
	LD.3	25.4912	0.0741731	31.7112	#DIV/0!
				errfi1 TSS
	U			8.72423
	L			6.29193
	LD			7.24575
	U.1			7.38445
Normalized	L.1			6.04453
to 28s	LD.1			6.16251
	U.2			6.76622
	L.2			5.95394
	LD.2			6.76384
	U.3			7.82598
	L.3			5.41151
	LD.3			6.22
				errfi1 TSS
	U			1
	L			5.39754
	LD			2.78654
	U.1			1
Occupancy	L.1			2.53137
vs U	LD.1			2.3326
	U.2			1
	L.2			1.75599
	LD.2			1.00165
	U.3			1
	L.3			5.33125
	LD.3			3.04402
2017-07-07
		28s		ccl2 TSS		errfi1 TSS
	U	25.5796	25.4705	33.6244	34.3102	33.7714	33.1995
	L	25.1465	25.7598	31.8805	32.0414	32.2435	32.4787
	LD	25.6426	25.3062	32.6364	32.2531	32.8747	32.3838
	U.1	25.7653	25.804				33.9714
	L.1	26.2907	26.3677			33.5462	33.2558
Raw Data	LD.1	26.6781	26.8677				34.7028
	U.2	25.2626	25.9856		34.651
	L.2	25.3905	25.3991	33.0931	33.2733
	LD.2	25.3549	24.9187	32.5528	32.9518
	U.3	27.96	27.7204	35.4728	35.6261	35.6237	35.2706
	L.3	27.6267	27.9701	34.2809	33.7758	33.3257
	LD.3	27.4125	27.4859	34.5564	34.1777	34.2435	34.4577
		28s	SD	ccl2 TSS	SD	errfi1 TSS	SD
	U	25.525	0.077178	33.9673	0.484884	33.4854	0.40437
	L	25.4532	0.433692	31.961	0.113759	32.3611	0.166354
	LD	25.4744	0.237846	32.4447	0.271026	32.6293	0.347117
	U.1	25.7847	0.027326			33.9714	#DIV/0!
Average	L.1	26.3292	0.0544308			33.401	0.205291
	LD.1	26.7729	0.134094			34.7028	#DIV/0!
	U.2	25.6241	0.511208	34.651	#DIV/0!
	L.2	25.3948	0.00612579	33.1832	0.127374
	LD.2	25.1368	0.308407	32.7523	0.282122
	U.3	27.8402	0.169384	35.5494	0.108371	35.4472	0.249704
	L.3	27.7984	0.242782	34.0283	0.357171	33.3257	#DIV/0!
	LD.3	27.4492	0.0519047	34.367	0.267763	34.3506	0.15144
				ccl2 TSS		errfi1 TSS
	U			8.44227		7.9604
	L			6.50782		6.90796
	LD			6.97031		7.15488
	U.1					8.18678
Normalized	L.1					7.07176
to 28s	LD.1					7.92992
	U.2			9.02695
	L.2			7.78839
	LD.2			7.61552
	U.3			7.70923		7.60697
	L.3			6.22994		5.52731
	LD.3			6.91786		6.90142
				ccl2 TSS		errfi1 TSS
	U			1		1
	L			3.82232		2.07404
	LD			2.77399		1.74778
	U.1					1
Occupancy	L.1					2.16597
vs U	LD.1					1.19487
	U.2			1
	L.2			2.35961
	LD.2			2.66
	U.3			1		1
	L.3			2.78812		4.22707
	LD.3			1.73072		1.63077
7/15/2017-1
gene	condition	ct1	ct2	sd	average	28S	nrmlize to 28s	normalize to cntrl	fold
28S	C	27.8972	27.6176	0.197677	27.7574
28S	L	27.5644	27.6224	0.0410085	27.5934
28S	LD	27.3587	27.1182	0.170093	27.2385
28S	3L	27.4368	27.3497	0.0615897	27.3932
CCL2	C	34.8795	36.1778	0.918022	35.5286	27.7574	7.77119	0	1
CCL2	L		33.4758	#DIV/0!	33.4758	27.5934	5.88242	-1.88878	3.70321
CCL2	LD	34.3899	34.1418	0.175428	34.2659	27.2385	7.0274	-0.743791	1.67457
CCL2	3L	33.7893	33.7289	0.0427403	33.7591	27.3932	6.36589	-1.4053	2.64873
7/15/2017-2
gene	condition	ct1	ct2	sd	average	28S	nrml to 28s	nrml cntrl	fold
28S	C	29.8704	29.6299	0.170062	29.7501
28S	L	29.4605	29.2399	0.156034	29.3502
28S	LD	31.0328	30.1691	0.610775	30.601
CCl2	C	37.3623	35.5518	1.28023	36.4571	29.7501	6.70697	0	1
CCl2	L	34.6119	33.4195	0.843174	34.0157	29.3502	4.66549	-2.04148	4.11668
CCl2	LD	39.1643	38.523	0.453468	38.8437	30.1691	8.67462	1.96765	0.255669
erff1	C	36.5085		#DIV/0!	36.5085	29.7501	6.75835	0	1
erff1	L	33.2598	34.6044	0.950765	33.9321	29.3502	4.58196	-2.17639	4.52022
erff1	LD	35.425	36.6452	0.862863	36.0351	30.1691	5.86604	-0.892316	1.85615
