# Supplementary material for: Gene-specific mechanisms direct glucocorticoid-receptor-driven repression of inflammatory response genes in macrophages
Source: eLife. 2018 Feb 9;7:e34864. doi: 10.7554/eLife.34864 (PMC5821458; doi:10.7554/eLife.34864)
Supplement: Figure 4—source data 1. [file elife-34864-fig4-data1.xlsx]

## Sheet: Fig4.
FIG 4A- H4 Modifications
				Average	SD	28S	Difference	Over control IgG
Control IgG	TNFa TSS	33.0241	32.9429	32.9835	0.0574087	22.1916	10.7919	0.998712
LPS IgG	TNFa TSS	32.2046	32.3111	32.2579	0.0752898	21.0147	11.2431	0.730464
L+D IgG	TNFa TSS	33.1893	32.5157	32.8525	0.47629	21.9263	10.9262	0.909915
Control H4Ac IgG	TNFa TSS	25.7448	25.8326	25.7887	0.0621184	20.4364	5.3523	43.3422
LPS H4Ac IgG	TNFa TSS	26.2445	26.1343	26.1894	0.0778725	19.924	6.26536	23.0171
L+D H4Ac IgG	TNFa TSS	26.1744	25.9775	26.076	0.13921	19.9063	6.16972	24.5948
Control H4AcK5 IgG	TNFa TSS	26.9847	26.9046	26.9447	0.0566615	20.8116	6.1331	25.227
LPS H4AcK5 IgG	TNFa TSS	26.992	26.9705	26.9812	0.0152174	20.2419	6.73939	16.5713
L+D H4AcK5 IgG	TNFa TSS	27.042	27.211	27.1265	0.11951	20.1407	6.98583	13.9691
Control H4AcK12 IgG	TNFa TSS	29.5291	29.8593	29.6942	0.233441	22.3948	7.29942	11.2401
LPS H4AcK12 IgG	TNFa TSS	29.4249	29.3015	29.3632	0.087273	21.1391	8.2241	5.92126
L+D H4AcK12 IgG	TNFa TSS	29.582	29.8492	29.7156	0.188954	21.7883	7.92735	7.27351
Control IgG	IL1b TSS	30.0933	30.4232	30.2582	0.233284	22.1916	8.0666	0.995434
LPS IgG	IL1b TSS	29.4448	29.3153	29.38	0.0915753	21.0147	8.3653	0.809272
L+D IgG	IL1b TSS	30.5184	30.1751	30.3468	0.242774	21.9263	8.42045	0.778924
Control H4Ac IgG	IL1b TSS	22.972	23.4309	23.2015	0.32449	20.4364	2.76507	39.2583
LPS H4Ac IgG	IL1b TSS	21.1453	21.3581	21.2517	0.15053	19.924	1.32766	106.325
L+D H4Ac IgG	IL1b TSS	21.5902	21.95	21.7701	0.254482	19.9063	1.86384	73.3214
Control H4AcK5 IgG	IL1b TSS	23.2473	23.6494	23.4483	0.284284	20.8116	2.63678	42.9095
LPS H4AcK5 IgG	IL1b TSS	21.8191	21.771	21.795	0.0340385	20.2419	1.55319	90.9382
L+D H4AcK5 IgG	IL1b TSS	22.5555	22.5137	22.5346	0.0295271	20.1407	2.39395	50.775
Control H4AcK12 IgG	IL1b TSS	27.1741	27.4657	27.3199	0.206159	22.3948	4.92513	8.78396
LPS H4AcK12 IgG	IL1b TSS	24.7822	24.8817	24.832	0.0703481	21.1391	3.69284	20.637
L+D H4AcK12 IgG	IL1b TSS	26.0091	26.0516	26.0303	0.030045	21.7883	4.24205	14.1032
Control IgG	IL1a TSS	31.7193	31.7058	31.7125	0.00954744	22.1916	9.52092	0.999366
LPS IgG	IL1a TSS	30.5137	30.4094	30.4615	0.073732	21.0147	9.44677	1.05207
L+D IgG	IL1a TSS	31.2543	31.5076	31.381	0.179088	21.9263	9.45463	1.04635
Control H4Ac IgG	IL1a TSS	24.1694	24.0627	24.1161	0.0753909	20.4364	3.67967	57.2949
LPS H4Ac IgG	IL1a TSS	23.1291	23.0446	23.0869	0.0597137	19.924	3.16282	81.9788
L+D H4Ac IgG	IL1a TSS	23.4515	23.609	23.5303	0.111403	19.9063	3.62401	59.5485
Control H4AcK5 IgG	IL1a TSS	24.5867	24.6314	24.6091	0.0315798	20.8116	3.7975	52.8012
LPS H4AcK5 IgG	IL1a TSS	23.4645	23.5402	23.5023	0.0534948	20.2419	3.26049	76.6128
L+D H4AcK5 IgG	IL1a TSS	24.321	24.3505	24.3358	0.0208792	20.1407	4.19513	40.0818
Control H4AcK12 IgG	IL1a TSS	28.1738	28.266	28.2199	0.0652217	22.3948	5.82512	12.95
LPS H4AcK12 IgG	IL1a TSS	26.785	26.8198	26.8024	0.0246192	21.1391	5.66326	14.4875
L+D H4AcK12 IgG	IL1a TSS	27.7488	27.9184	27.8336	0.119948	21.7883	6.04533	11.1168
Control IgG	IL1b -10kb	30.9486	30.6367	30.7926	0.220496	22.1916	8.60103	0.999286
LPS IgG	IL1b -10kb	30.3313	30.5423	30.4368	0.149231	21.0147	9.42208	0.565628
L+D IgG	IL1b -10kb	30.5462	30.7633	30.6547	0.153529	21.9263	8.72841	0.91484
Control H4Ac IgG	IL1b -10kb	22.4931	22.3623	22.4277	0.0925262	20.4364	1.99133	97.5906
LPS H4Ac IgG	IL1b -10kb	21.5296	21.3784	21.454	0.106899	19.924	1.52996	134.367
L+D H4Ac IgG	IL1b -10kb	21.5278	21.527	21.5274	0.00059073	19.9063	1.62114	126.138
Control H4AcK5 IgG	IL1b -10kb	23.548	23.3153	23.4316	0.164556	20.8116	2.62005	63.1169
LPS H4AcK5 IgG	IL1b -10kb	22.1123	22.0775	22.0949	0.0246286	20.2419	1.85307	107.406
L+D H4AcK5 IgG	IL1b -10kb	22.5867	22.5915	22.5891	0.00341356	20.1407	2.44845	71.0886
Control H4AcK12 IgG	IL1b -10kb	26.4082	26.3749	26.3916	0.0235955	22.3948	3.99679	24.3055
LPS H4AcK12 IgG	IL1b -10kb	24.707	24.7198	24.7134	0.00903089	21.1391	3.5743	32.5752
L+D H4AcK12 IgG	IL1b -10kb	25.3984	25.3659	25.3822	0.0229791	21.7883	3.59389	32.1357
Control IgG	IL1a -10kb	32.1576	31.2551	31.7063	0.638138	22.1916	9.5147	0.996744
LPS IgG	IL1a -10kb	30.5319	30.3463	30.4391	0.131224	21.0147	9.42432	1.06118
L+D IgG	IL1a -10kb	31.7723	31.9202	31.8463	0.10459	21.9263	9.91993	0.752658
Control H4Ac IgG	IL1a -10kb	24.7409	25.3819	25.0614	0.453241	20.4364	4.62503	29.5476
LPS H4Ac IgG	IL1a -10kb	23.6692	23.4765	23.5729	0.136262	19.924	3.64883	58.1283
L+D H4Ac IgG	IL1a -10kb	24.1799	24.8194	24.4996	0.452177	19.9063	4.59338	30.203
Control H4AcK5 IgG	IL1a -10kb	25.0782	25.5478	25.313	0.332028	20.8116	4.50143	32.1906
LPS H4AcK5 IgG	IL1a -10kb	23.732	23.8038	23.7679	0.050792	20.2419	3.52606	63.2917
L+D H4AcK5 IgG	IL1a -10kb	24.5583	25.0081	24.7832	0.318054	20.1407	4.64253	29.1913
Control H4AcK12 IgG	IL1a -10kb	29.0383	29.1418	29.09	0.0731373	22.3948	6.69527	7.03586
LPS H4AcK12 IgG	IL1a -10kb	27.4377	27.2983	27.368	0.098571	21.1391	6.22887	9.72115
L+D H4AcK12 IgG	IL1a -10kb	28.1971	28.6539	28.4255	0.322976	21.7883	6.63725	7.32461
Control IgG	Ccl2 TSS	33.2041	33.5274	33.3657	0.228621	25.9823	7.38345	0.00345146	0.99761
LPS IgG	Ccl2 TSS	33.526	33.3304	33.4282	0.138317	24.7586	8.66959	1.28959	0.409066
L+D IgG	Ccl2 TSS	33.4618	33.9112	33.6865	0.317759	24.9942	8.69226	1.31226	0.402689
Control H4Ac	Ccl2 TSS	27.5276	27.2404	27.384	0.203044	24.0092	3.37484	-4.00516	16.0574
LPS H4Ac	Ccl2 TSS	27.9121	27.828	27.87	0.0594911	23.5459	4.32414	-3.05586	8.31584
L+D H4Ac	Ccl2 TSS	27.8477	27.8783	27.863	0.0216453	23.3044	4.55861	-2.82139	7.06842
Control H4AcK5	Ccl2 TSS	28.2604	28.4894	28.3749	0.161915	24.2953	4.07967	-3.30033	9.85143
LPS H4AcK5	Ccl2 TSS	27.7907	27.6927	27.7417	0.0693218	23.4898	4.25192	-3.12808	8.74272
L+D H4AcK5	Ccl2 TSS	27.9819	28.3182	28.15	0.237804	23.7769	4.37309	-3.00691	8.03843
Control H4AcK12	Ccl2 TSS	31.4268	31.567	31.4969	0.0991078	25.6625	5.83434	-1.54566	2.91938
LPS H4AcK12	Ccl2 TSS	31.6456	31.9833	31.8144	0.238816	24.8833	6.93112	-0.448885	1.36498
L+D H4AcK12	Ccl2 TSS	31.116	31.3948	31.2554	0.197137	24.8327	6.42263	-0.957374	1.94177
Control IgG	Il1a -20kb	36.6458	36.3601	36.503	0.202051	25.9823	10.5207	0	1
LPS IgG	Il1a -20kb	35.9122	36.0284	35.9703	0.0821816	24.7586	11.2117	0.691044	0.619406
L+D IgG	Il1a -20kb		35.589	35.589	#DIV/0!	24.9942	10.5947	0.0740242	0.949984
Control H4Ac	Il1a -20kb	30.1669	30.1066	30.1368	0.0426324	24.0092	6.12758	-4.39311	21.0115
LPS H4Ac	Il1a -20kb	28.382	27.9602	28.1711	0.298258	23.5459	4.62521	-5.89549	59.5276
L+D H4Ac	Il1a -20kb	28.4617		28.4617	#DIV/0!	23.3044	5.15727	-5.36342	41.1672
Control H4AcK5	Il1a -20kb	30.3763	30.116	30.2461	0.18405	24.2953	5.95086	-4.56983	23.7496
LPS H4AcK5	Il1a -20kb	28.1695	27.8141	27.9918	0.251296	23.4898	4.50199	-6.01871	64.8352
L+D H4AcK5	Il1a -20kb	29.0927	28.8794	28.9861	0.150824	23.7769	5.20912	-5.31158	39.7141
Control H4AcK12	Il1a -20kb	34.4907	34.3686	34.4297	0.0863437	25.6625	8.76712	-1.75357	3.37193
LPS H4AcK12	Il1a -20kb	32.6555	32.3475	32.5015	0.217826	24.8833	7.61816	-2.90253	7.47739
L+D H4AcK12	Il1a -20kb	32.6006	32.7465	32.6735	0.103189	24.8327	7.84078	-2.67991	6.40817
Control IgG	Tnf -200bp	32.4198	32.9528	32.6863	0.376883	25.9823	6.70403	0	1
LPS IgG	Tnf -200bp	31.8742	31.8426	31.8584	0.0223075	24.7586	7.09983	0.3958	0.760068
L+D IgG	Tnf -200bp	32.6583	33.1007	32.8795	0.312809	24.9942	7.88524	1.18121	0.440982
Control H4Ac	Tnf -200bp	24.2003	24.2316	24.2159	0.0220782	24.0092	0.206777	-6.49725	90.3375
LPS H4Ac	Tnf -200bp	24.1647	23.7598	23.9623	0.286271	23.5459	0.416362	-6.28767	78.1226
L+D H4Ac	Tnf -200bp	24.1182	23.6989	23.9085	0.29647	23.3044	0.604127	-6.0999	68.5888
Control H4AcK5	Tnf -200bp	25.8421	25.5638	25.7029	0.19679	24.2953	1.40765	-5.29638	39.2978
LPS H4AcK5	Tnf -200bp	24.4347	24.5449	24.4898	0.0778941	23.4898	1.00002	-5.70401	52.1289
L+D H4AcK5	Tnf -200bp	24.7861	24.7952	24.7907	0.00643734	23.7769	1.01375	-5.69027	51.6349
Control H4AcK12	Tnf -200bp	28.2864	28.1747	28.2306	0.0789609	25.6625	2.56801	-4.13602	17.5819
LPS H4AcK12	Tnf -200bp	27.7813	27.9847	27.883	0.143808	24.8833	2.99969	-3.70434	13.0352
L+D H4AcK12	Tnf -200bp	27.7654	27.7506	27.758	0.0104362	24.8327	2.92524	-3.77879	13.7255
Control IgG	Ccl2 -12.5kb	31.46	31.954	31.707	0.349333	25.9823	5.72472	0	1
LPS IgG	Ccl2 -12.5kb		30.914	30.914	#DIV/0!	24.7586	6.15547	0.430753	0.741875
L+D IgG	Ccl2 -12.5kb	31.74	31.3325	31.5362	0.288158	24.9942	6.54199	0.817271	0.567514
Control H4Ac	Ccl2 -12.5kb	24.1945	24.5281	24.3613	0.235879	24.0092	0.352118	-5.3726	41.43
LPS H4Ac	Ccl2 -12.5kb	23.524	23.7911	23.6576	0.188848	23.5459	0.11165	-5.61307	48.9444
L+D H4Ac	Ccl2 -12.5kb	22.9669	23.2721	23.1195	0.215859	23.3044	-0.184877	-5.9096	60.1127
Control H4AcK5	Ccl2 -12.5kb	24.6827	24.7844	24.7336	0.0719086	24.2953	0.438308	-5.28641	39.0273
LPS H4AcK5	Ccl2 -12.5kb	23.7607	24.2462	24.0035	0.343259	23.4898	0.513688	-5.21103	37.0405
L+D H4AcK5	Ccl2 -12.5kb	24.3282	24.5951	24.4617	0.188714	23.7769	0.684752	-5.03997	32.8989
Control H4AcK12	Ccl2 -12.5kb		28.133	28.133	#DIV/0!	25.6625	2.47043	-3.25429	9.54197
LPS H4AcK12	Ccl2 -12.5kb	26.8277	27.2793	27.0535	0.319306	24.8833	2.17016	-3.55456	11.7498
L+D H4AcK12	Ccl2 -12.5kb	26.7713	27.2642	27.0177	0.348539	24.8327	2.18501	-3.53972	11.6295
Control IgG	TNFa TSS	33.5645	33.6992	33.6318	0.0952559	22.7646	10.8672	0.995046
LPS IgG	TNFa TSS	33.9096	33.2825	33.5961	0.443425	23.4361	10.16	1.62456
L+D IgG	TNFa TSS	33.1237		33.1237	#DIV/0!	22.3646	10.7591	1.07242
Control H4Ac	TNFa TSS	26.6503	26.8068	26.7286	0.110624	21.584	5.14455	52.5439
LPS H4Ac	TNFa TSS	26.5574	26.4713	26.5143	0.0608169	21.005	5.50934	40.8045
L+D H4Ac	TNFa TSS	27.5607	27.5356	27.5481	0.0177219	22.0889	5.45921	42.2475
Control IgG	IL1b TSS	30.3117	30.9705	30.6411	0.465787	22.7646	7.87645	0.99554
LPS IgG	IL1b TSS	31.1209	31.7255	31.4232	0.427492	23.4361	7.98707	0.92206
L+D IgG	IL1b TSS	29.4739	29.3994	29.4366	0.0526788	22.3646	7.07205	1.73863
Control H4Ac	IL1b TSS	24.0524	24.4931	24.2728	0.311644	21.584	2.68875	36.2838
LPS H4Ac	IL1b TSS	21.9564	22.2117	22.084	0.1805	21.005	1.07903	110.736
L+D H4Ac	IL1b TSS	23.705	24.1157	23.9103	0.290402	22.0889	1.82139	66.1933
Control IgG	IL1a TSS	30.932	31.0606	30.9963	0.0909603	22.7646	8.23163	0.998869
LPS IgG	IL1a TSS	32.0183	31.8011	31.9097	0.153594	23.4361	8.47361	0.84463
L+D IgG	IL1a TSS	30.0145	30.3935	30.204	0.267974	22.3646	7.83943	1.31091
Control H4Ac	IL1a TSS	24.697	24.7884	24.7427	0.0646458	21.584	3.15873	33.6204
LPS H4Ac	IL1a TSS	23.0486	23.0069	23.0277	0.0294691	21.005	2.02273	73.8883
L+D H4Ac	IL1a TSS	23.5384	23.5777	23.5581	0.0277778	22.0889	1.46913	108.449
Control IgG	IL1b -10kb	30.1872	30.8151	30.5012	0.443985	22.7646	7.73651	0.995501
LPS IgG	IL1b -10kb	31.0582	31.186	31.1221	0.0903237	23.4361	7.68598	1.03099
L+D IgG	IL1b -10kb	29.8572	30.2077	30.0325	0.247834	22.3646	7.6679	1.04399
Control H4Ac	IL1b -10kb	23.0662	23.1441	23.1051	0.0550984	21.584	1.52112	73.9707
LPS H4Ac	IL1b -10kb	21.7428	21.7332	21.738	0.00680014	21.005	0.732957	127.738
L+D H4Ac	IL1b -10kb	21.9689	21.9523	21.9606	0.0117782	22.0889	-0.128339	232.058
Control IgG	IL1a -10kb	32.0003	31.6702	31.8352	0.233472	22.7646	9.07059	0.999588
LPS IgG	IL1a -10kb	33.2212	32.6617	32.9415	0.395609	23.4361	9.50535	0.739512
L+D IgG	IL1a -10kb	30.9781	31.1754	31.0767	0.139515	22.3646	8.71214	1.28152
Control H4Ac	IL1a -10kb	26.1376	26.4783	26.3079	0.24091	21.584	4.7239	20.3379
LPS H4Ac	IL1a -10kb	24.0774	24.1096	24.0935	0.0227836	21.005	3.08853	63.1832
L+D H4Ac	IL1a -10kb	25.0159	25.4205	25.2182	0.286059	22.0889	3.12929	61.4233
Control IgG	Ccl2 TSS		36.1346	36.1346	#DIV/0!	25.6435	10.4911	0.00113655	0.999213
LPS IgG	Ccl2 TSS	35.9727	36.0091	35.9909	0.0257575	25.816	10.1749	-0.315071	1.24407
L+D IgG	Ccl2 TSS	34.9982	34.6074	34.8028	0.276357	24.2211	10.5817	0.091748	0.938385
Control H4Ac	Ccl2 TSS	29.4152	29.272	29.3436	0.101223	24.8464	4.49719	-5.99281	63.6818
LPS H4Ac	Ccl2 TSS	29.0328	29.1161	29.0744	0.0589085	24.2286	4.84587	-5.64413	50.0095
L+D H4Ac	Ccl2 TSS	29.0966	28.9734	29.035	0.0871543	23.9908	5.04425	-5.44575	43.5846
Control IgG	Il1a -20kb	38.0208		38.0208	#DIV/0!	25.6435	12.3773	0	1
LPS IgG	Il1a -20kb	38.1158	38.2256	38.1707	0.0776419	25.816	12.3547	-0.0225925	1.01578
L+D IgG	Il1a -20kb	38.1947		38.1947	#DIV/0!	24.2211	13.9736	1.5963	0.330724
Control H4Ac	Il1a -20kb	31.6672	31.1101	31.3886	0.393886	24.8464	6.54224	-5.83506	57.0858
LPS H4Ac	Il1a -20kb	28.7461	28.6474	28.6967	0.0698006	24.2286	4.46816	-7.90915	240.375
L+D H4Ac	Il1a -20kb	30.0521	29.7546	29.9034	0.210328	23.9908	5.91262	-6.46468	88.3208
Control IgG	Tnf -200bp		35.6115	35.6115	#DIV/0!	25.6435	9.96804	0	1
LPS IgG	Tnf -200bp	35.0536	34.405	34.7293	0.458617	25.816	8.9133	-1.05474	2.07735
L+D IgG	Tnf -200bp	34.2878	34.2874	34.2876	0.000299411	24.2211	10.0665	0.0984659	0.934026
Control H4Ac	Tnf -200bp	26.2745	26.3732	26.3238	0.0698329	24.8464	1.47743	-8.49061	359.689
LPS H4Ac	Tnf -200bp	25.5884	25.6249	25.6067	0.0258586	24.2286	1.37811	-8.58993	385.326
L+D H4Ac	Tnf -200bp	26.0676	25.9043	25.9859	0.115427	23.9908	1.99518	-7.97286	251.229
Control IgG	Ccl2 -12.5kb	33.2577	33.1764	33.217	0.0574708	25.6435	7.57358	0	1
LPS IgG	Ccl2 -12.5kb	33.5317	33.1308	33.3313	0.283456	25.816	7.5153	-0.0582848	1.04123
L+D IgG	Ccl2 -12.5kb	32.7679	33.17	32.969	0.284325	24.2211	8.74789	1.17431	0.443097
Control H4Ac	Ccl2 -12.5kb	25.955	26.0584	26.0067	0.0731224	24.8464	1.16031	-6.41327	85.2287
LPS H4Ac	Ccl2 -12.5kb	24.7449	24.8642	24.8046	0.0843463	24.2286	0.576007	-6.99757	127.785
L+D H4Ac	Ccl2 -12.5kb	24.8597	25.17	25.0148	0.219392	23.9908	1.02408	-6.5495	93.6692
Control IgG	TNFa TSS	33.4224	34.1064	33.7644	0.483662	22.2451	11.5193	0.99357
LPS IgG	TNFa TSS	32.9073	33.2358	33.0716	0.232289	22.6391	10.4324	2.11049
L+D IgG	TNFa TSS	32.948	32.8329	32.8904	0.081421	22.3229	10.5676	1.92175
Control H4Ac	TNFa TSS	26.2493	26.3991	26.3242	0.105975	20.796	5.52821	63.1971
LPS H4Ac	TNFa TSS	26.4271	26.5777	26.5024	0.106478	20.2435	6.25891	38.0833
L+D H4Ac	TNFa TSS	26.2204	26.2254	26.2229	0.00354438	20.4264	5.79647	52.4739
Control H4K5Ac	TNFa TSS	27.4893	27.3451	27.4172	0.101966	20.725	6.69223	28.2029
LPS H4K5Ac	TNFa TSS	27.4964	27.3772	27.4368	0.0842465	20.473	6.96376	23.3644
L+D H4K5Ac	TNFa TSS	26.9862	27.0738	27.03	0.0619255	20.1639	6.86616	24.9997
Control H4K12Ac	TNFa TSS	29.9359	29.9795	29.9577	0.0308394	21.9761	7.98165	11.5383
LPS H4K12Ac	TNFa TSS	29.9345	30.0415	29.988	0.0756634	21.8818	8.10622	10.5838
L+D H4K12Ac	TNFa TSS	29.8402	29.7915	29.8158	0.0344701	22.0243	7.79155	13.1633
Control IgG	IL1b TSS	30.9642	30.1327	30.5484	0.587944	22.2451	8.30329	0.997725
LPS IgG	IL1b TSS	31.3977	31.0289	31.2133	0.260794	22.6391	8.57417	0.826926
L+D IgG	IL1b TSS	30.9945	31.3347	31.1646	0.240523	22.3229	8.84175	0.686939
Control H4Ac	IL1b TSS	23.5625	23.9048	23.7336	0.242087	20.796	2.93765	41.1365
LPS H4Ac	IL1b TSS	21.8008	21.9073	21.854	0.0753397	20.2435	1.61055	103.21
L+D H4Ac	IL1b TSS	21.9894	22.3173	22.1534	0.231858	20.4264	1.72691	95.2132
Control H4K5Ac	IL1b TSS	23.9283	24.2538	24.0911	0.230199	20.725	3.36612	30.5665
LPS H4K5Ac	IL1b TSS	22.5313	22.6448	22.5881	0.0802638	20.473	2.11505	72.7538
L+D H4K5Ac	IL1b TSS	22.5643	22.6051	22.5847	0.0288568	20.1639	2.42084	58.8578
Control H4K12Ac	IL1b TSS	27.7268	27.9667	27.8468	0.169625	21.9761	5.87068	5.38638
LPS H4K12Ac	IL1b TSS	25.6896	25.6324	25.661	0.0404677	21.8818	3.77921	22.9558
L+D H4K12Ac	IL1b TSS	26.3842	26.2639	26.324	0.0850921	22.0243	4.29975	16.0028
Control IgG	IL1a TSS	31.5817	31.8274	31.7045	0.173787	22.2451	9.4594	0.993504
LPS IgG	IL1a TSS	31.7532	31.6807	31.717	0.05126	22.6391	9.07785	1.29428
L+D IgG	IL1a TSS	31.3107	31.9365	31.6236	0.442503	22.3229	9.30071	1.10903
Control H4Ac	IL1a TSS	24.2558	24.3979	24.3269	0.100475	20.796	3.5309	60.51
LPS H4Ac	IL1a TSS	23.0216	23.579	23.3003	0.39418	20.2435	3.05681	84.0511
L+D H4Ac	IL1a TSS	23.7371	23.5946	23.6659	0.100729	20.4264	3.23942	74.0577
Control H4K5Ac	IL1a TSS	25.2202	25.2769	25.2485	0.040086	20.725	4.52356	30.4094
LPS H4K5Ac	IL1a TSS	24.4756	24.2749	24.3752	0.141947	20.473	3.9022	46.7793
L+D H4K5Ac	IL1a TSS	23.9617	24.4808	24.2212	0.367111	20.1639	4.05737	42.009
Control H4K12Ac	IL1a TSS	28.3582	32.1312	30.2447	2.66788	21.9761	8.26861	2.26796
LPS H4K12Ac	IL1a TSS	29.268	29.1846	29.2263	0.0589881	21.8818	7.34452	4.3034
L+D H4K12Ac	IL1a TSS	28.5808	28.389	28.4849	0.135622	22.0243	6.46063	7.94128
Control IgG	IL1b -10kb	32.0265	31.5143	31.7704	0.362217	22.2451	9.52527	0.996356
LPS IgG	IL1b -10kb	31.8934	31.3476	31.6205	0.385936	22.6391	8.98138	1.45258
L+D IgG	IL1b -10kb	31.075	31.6059	31.3405	0.375462	22.3229	9.0176	1.41657
Control H4Ac	IL1b -10kb	23.5522	23.3588	23.4555	0.136757	20.796	2.65952	116.201
LPS H4Ac	IL1b -10kb	22.2376	22.2147	22.2262	0.0161358	20.2435	1.98266	185.766
L+D H4Ac	IL1b -10kb	22.2602	22.3204	22.2903	0.0426216	20.4264	1.86384	201.713
Control H4K5Ac	IL1b -10kb	24.6804	24.7341	24.7072	0.0380104	20.725	3.98229	46.4533
LPS H4K5Ac	IL1b -10kb	23.17	23.1691	23.1696	0.000648724	20.473	2.69655	113.256
L+D H4K5Ac	IL1b -10kb	22.9832	22.9772	22.9802	0.00424436	20.1639	2.81637	104.23
Control H4K12Ac	IL1b -10kb	27.5743	27.2074	27.3908	0.259457	21.9761	5.41474	17.211
LPS H4K12Ac	IL1b -10kb	26.6439	26.3351	26.4895	0.218341	21.8818	4.60776	30.1114
L+D H4K12Ac	IL1b -10kb	26.2906	26.1897	26.2402	0.0713152	22.0243	4.21588	39.5092
Control IgG	IL1a -10kb	32.2758	32.4275	32.3517	0.107213	22.2451	10.1065	0.995492
LPS IgG	IL1a -10kb	32.6819	32.2098	32.4458	0.333814	22.6391	9.8067	1.22544
L+D IgG	IL1a -10kb	31.9006	32.4038	32.1522	0.35585	22.3229	9.82934	1.20636
Control H4Ac	IL1a -10kb	25.3161	25.8203	25.5682	0.356556	20.796	4.77219	40.1633
LPS H4Ac	IL1a -10kb	23.8272	24.1918	24.0095	0.257801	20.2435	3.76603	80.6704
L+D H4Ac	IL1a -10kb	24.449	25.1341	24.7916	0.484474	20.4264	4.36513	53.2561
Control H4K5Ac	IL1a -10kb	25.9762	26.373	26.1746	0.280564	20.725	5.44961	25.1134
LPS H4K5Ac	IL1a -10kb	24.6731	24.509	24.591	0.116066	20.473	4.118	63.2062
L+D H4K5Ac	IL1a -10kb	25.651	25.2567	25.4539	0.278835	20.1639	5.29001	28.0512
Control H4K12Ac	IL1a -10kb	29.6271	30.0365	29.8318	0.289554	21.9761	7.8557	4.73808
LPS H4K12Ac	IL1a -10kb	28.3158	28.0383	28.177	0.196171	21.8818	6.29529	13.9744
L+D H4K12Ac	IL1a -10kb	28.7634	29.0513	28.9073	0.203551	22.0243	6.88304	9.29825
Control IgG	Ccl2 TSS	35.8627	36.4168	36.1397	0.3918	26.3372	9.80251	0.00251026	0.998262
LPS IgG	Ccl2 TSS	35.4687	34.9961	35.2324	0.334186	26.4845	8.74794	-1.05206	2.07349
L+D IgG	Ccl2 TSS	34.807	34.7407	34.7739	0.0468295	26.3825	8.39136	-1.40864	2.65487
Control H4Ac	Ccl2 TSS	29.5166	29.3975	29.4571	0.0841898	25.355	4.1021	-5.6979	51.9085
LPS H4Ac	Ccl2 TSS	29.0624	29.4644	29.2634	0.284287	24.6264	4.63705	-5.16295	35.8265
L+D H4Ac	Ccl2 TSS	29.3464	29.0784	29.2124	0.189548	24.7057	4.50673	-5.29327	39.2133
Control H4AcK5	Ccl2 TSS	29.6937	29.377	29.5354	0.223953	24.8792	4.6561	-5.1439	35.3563
LPS H4AcK5	Ccl2 TSS	29.6947	29.3425	29.5186	0.249094	24.7512	4.76736	-5.03264	32.7323
L+D H4AcK5	Ccl2 TSS	29.7473	29.4961	29.6217	0.17763	24.8046	4.81711	-4.98289	31.6227
Control H4AcK12	Ccl2 TSS	33.1807	33.1047	33.1427	0.0537295	25.9165	7.22625	-2.57375	5.95354
LPS H4AcK12	Ccl2 TSS	32.3948	32.627	32.5109	0.164212	25.7906	6.72036	-3.07964	8.45406
L+D H4AcK12	Ccl2 TSS	32.4622	32.4635	32.4629	0.000979156	26.189	6.27389	-3.52611	11.5203
Control IgG	Il1a -20kb	39.4299	39.2469	39.3384	0.129356	26.3372	13.0012	0	1
LPS IgG	Il1a -20kb	39.5747	39.0863	39.3305	0.345361	26.4845	12.846	-0.155179	1.11356
L+D IgG	Il1a -20kb	39.5402	39.7997	39.67	0.183499	26.3825	13.2875	0.286274	0.820017
Control H4Ac	Il1a -20kb	32.611		32.611	#DIV/0!	25.355	7.256	-5.74519	53.6381
LPS H4Ac	Il1a -20kb	29.797	29.6243	29.7106	0.122096	24.6264	5.08426	-7.91693	241.675
L+D H4Ac	Il1a -20kb	30.566		30.566	#DIV/0!	24.7057	5.86035	-7.14083	141.125
Control H4AcK5	Il1a -20kb	32.1526	32.1377	32.1451	0.010474	24.8792	7.2659	-5.73528	53.2711
LPS H4AcK5	Il1a -20kb	30.5383	30.0733	30.3058	0.328845	24.7512	5.55457	-7.44661	174.443
L+D H4AcK5	Il1a -20kb	31.4707		31.4707	#DIV/0!	24.8046	6.66612	-6.33506	80.7317
Control H4AcK12	Il1a -20kb	36.1244	36.1233	36.1238	0.000760666	25.9165	10.2073	-2.79383	6.9347
LPS H4AcK12	Il1a -20kb	33.8939	33.7937	33.8438	0.0708849	25.7906	8.05325	-4.94794	30.8658
L+D H4AcK12	Il1a -20kb	33.9553	34.4313	34.1933	0.336608	26.189	8.00432	-4.99686	31.9305
Control IgG	Tnf -200bp		36.3771	36.3771	#DIV/0!	26.3372	10.0398	0	1
LPS IgG	Tnf -200bp	36.4882	36.1528	36.3205	0.237107	26.4845	9.83601	-0.203822	1.15175
L+D IgG	Tnf -200bp		35.274	35.274	#DIV/0!	26.3825	8.89152	-1.14831	2.21654
Control H4Ac	Tnf -200bp	26.9179	26.8238	26.8709	0.0665664	25.355	1.5159	-8.52393	368.093
LPS H4Ac	Tnf -200bp	26.6164	26.5802	26.5983	0.0255902	24.6264	1.9719	-8.06793	268.342
L+D H4Ac	Tnf -200bp	27.2029	26.9854	27.0942	0.153754	24.7057	2.38847	-7.65136	201.043
Control H4AcK5	Tnf -200bp	28.4256	28.286	28.3558	0.0987086	24.8792	3.47656	-6.56327	94.5671
LPS H4AcK5	Tnf -200bp	27.5444	27.2296	27.387	0.222574	24.7512	2.63579	-7.40404	169.37
L+D H4AcK5	Tnf -200bp	27.3382	27.3427	27.3405	0.00317079	24.8046	2.53587	-7.50396	181.517
Control H4AcK12	Tnf -200bp	31.2246	30.746	30.9853	0.338482	25.9165	5.06882	-4.97101	31.3634
LPS H4AcK12	Tnf -200bp	30.3035	29.9852	30.1444	0.225068	25.7906	4.35379	-5.68604	51.4834
L+D H4AcK12	Tnf -200bp	30.4904	30.7099	30.6001	0.155226	26.189	4.41118	-5.62865	49.4757
Control IgG	Ccl2 -12.5kb	33.6577		33.6577	#DIV/0!	26.3372	7.32044	0	1
LPS IgG	Ccl2 -12.5kb	34.1194	33.7636	33.9415	0.251554	26.4845	7.45701	0.136575	0.909676
L+D IgG	Ccl2 -12.5kb	34.0709	34.1125	34.0917	0.0294313	26.3825	7.7092	0.388765	0.763783
Control H4Ac	Ccl2 -12.5kb	26.143	26.372	26.2575	0.161961	25.355	0.902536	-6.4179	85.5029
LPS H4Ac	Ccl2 -12.5kb	25.1571	25.6866	25.4219	0.374443	24.6264	0.795492	-6.52495	92.0883
L+D H4Ac	Ccl2 -12.5kb	25.907	26.1348	26.0209	0.161045	24.7057	1.31519	-6.00524	64.2331
Control H4AcK5	Ccl2 -12.5kb	26.7819	27.0552	26.9186	0.193308	24.8792	2.03931	-5.28113	38.8846
LPS H4AcK5	Ccl2 -12.5kb	26.3219	26.5365	26.4292	0.151754	24.7512	1.67798	-5.64245	49.9514
L+D H4AcK5	Ccl2 -12.5kb	26.5273	26.8513	26.6893	0.229106	24.8046	1.88469	-5.43575	43.2835
Control H4AcK12	Ccl2 -12.5kb		30.4345	30.4345	#DIV/0!	25.9165	4.51801	-2.80243	6.97613
LPS H4AcK12	Ccl2 -12.5kb	28.5875	28.8079	28.6977	0.155823	25.7906	2.90716	-4.41328	21.3074
L+D H4AcK12	Ccl2 -12.5kb		29.8541	29.8541	#DIV/0!	26.189	3.66518	-3.65525	12.5991
Control IgG	TNFa TSS	33.7226	33.0772	33.3999	0.456381	22.3491	11.0508	0.999447
LPS IgG	TNFa TSS	32.5437	32.5463	32.545	0.00182344	23.2851	9.25996	3.45825
L+D IgG	TNFa TSS	33.1391	33.1653	33.1522	0.0184826	22.7896	10.3627	1.61031
Control H4Ac IgG	TNFa TSS	26.2563	26.2361	26.2462	0.0142854	21.5765	4.66964	83.3066
LPS H4Ac IgG	TNFa TSS	26.3486	26.4712	26.4099	0.0867187	21.4907	4.91923	70.0722
L+D H4Ac IgG	TNFa TSS	26.3076	26.4141	26.3608	0.0752965	21.347	5.01386	65.6234
Control H4AcK5 IgG	TNFa TSS	27.1118	26.9391	27.0254	0.122126	21.5178	5.5076	46.6047
LPS H4AcK5 IgG	TNFa TSS	27.2962	27.2907	27.2935	0.00389369	21.9094	5.38408	50.7706
L+D H4AcK5 IgG	TNFa TSS	27.0922	27.3377	27.2149	0.173537	21.6527	5.56227	44.8717
Control IgG	IL1b TSS	29.69	29.9563	29.8231	0.188289	22.3491	7.47399	0.997236
LPS IgG	IL1b TSS	31.0389	30.9846	31.0118	0.0383772	23.2851	7.72673	0.836984
L+D IgG	IL1b TSS	30.6552	30.5488	30.602	0.0752183	22.7896	7.81247	0.788692
Control H4Ac IgG	IL1b TSS	23.4577	24.012	23.7348	0.391945	21.5765	2.15829	39.7178
LPS H4Ac IgG	IL1b TSS	22.2593	22.2817	22.2705	0.0158499	21.4907	0.779778	103.266
L+D H4Ac IgG	IL1b TSS	22.6278	22.9422	22.785	0.222333	21.347	1.43802	65.4343
Control H4AcK5 IgG	IL1b TSS	24.0445	23.8839	23.9642	0.113623	21.5178	2.44636	32.5287
LPS H4AcK5 IgG	IL1b TSS	22.7134	22.7903	22.7518	0.0544173	21.9094	0.842438	98.8769
L+D H4AcK5 IgG	IL1b TSS	24.4188		24.4188	#DIV/0!	21.6527	2.76614	26.0617
Control IgG	IL1a TSS	30.4432	30.8472	30.6452	0.285684	22.3491	8.29608	0.995795
LPS IgG	IL1a TSS	31.3957	31.2775	31.3366	0.0835519	23.2851	8.05156	1.17972
L+D IgG	IL1a TSS	31.0019	31.0933	31.0476	0.0646216	22.7896	8.25803	1.02241
Control H4Ac IgG	IL1a TSS		23.4142	23.4142	#DIV/0!	21.5765	1.83768	87.5675
LPS H4Ac IgG	IL1a TSS	22.7099	22.6967	22.7033	0.00935593	21.4907	1.21263	135.052
L+D H4Ac IgG	IL1a TSS	23.3626	23.3499	23.3562	0.00904033	21.347	2.00929	77.7465
Control H4AcK5 IgG	IL1a TSS	23.5569	23.5014	23.5292	0.0392512	21.5178	2.01132	77.6375
LPS H4AcK5 IgG	IL1a TSS	23.3045	23.3052	23.3049	0.000505762	21.9094	1.39549	118.975
L+D H4AcK5 IgG	IL1a TSS	24.0172	24.0813	24.0492	0.0453082	21.6527	2.39655	59.4435
Control IgG	IL1b -10kb	30.6383	30.6295	30.6339	0.00625257	22.3491	8.28475	0.996713
LPS IgG	IL1b -10kb	31.5212	31.3335	31.4273	0.13277	23.2851	8.14229	1.10015
L+D IgG	IL1b -10kb	31.2614	31.0417	31.1515	0.155299	22.7896	8.36198	0.944757
Control H4Ac IgG	IL1b -10kb	22.829	22.7518	22.7904	0.0546318	21.5765	1.21386	134.005
LPS H4Ac IgG	IL1b -10kb	22.0021	21.9533	21.9777	0.034497	21.4907	0.487042	221.776
L+D H4Ac IgG	IL1b -10kb	22.4714	22.4489	22.4601	0.0159335	21.347	1.11318	143.69
Control H4AcK5 IgG	IL1b -10kb	23.5849	23.3149	23.4499	0.190945	21.5178	1.93206	81.4555
LPS H4AcK5 IgG	IL1b -10kb	22.9322	22.8768	22.9045	0.039119	21.9094	0.995112	155.944
L+D H4AcK5 IgG	IL1b -10kb	23.174	23.2028	23.1884	0.0203182	21.6527	1.53571	107.209
Control IgG	IL1a -10kb	30.8272	31.4034	31.1153	0.407478	22.3491	8.76615	0.995746
LPS IgG	IL1a -10kb	32.1327	32.3739	32.2533	0.170594	23.2851	8.96823	0.865597
L+D IgG	IL1a -10kb	32.557	32.3137	32.4354	0.172083	22.7896	9.64581	0.541184
Control H4Ac IgG	IL1a -10kb	24.9437	25.3807	25.1622	0.309015	21.5765	3.58568	36.1098
LPS H4Ac IgG	IL1a -10kb	23.9084	23.968	23.9382	0.0421131	21.4907	2.44752	79.4778
L+D H4Ac IgG	IL1a -10kb	24.6892	25.2346	24.9619	0.385644	21.347	3.61497	35.384
Control H4AcK5 IgG	IL1a -10kb	24.9248	25.1486	25.0367	0.15827	21.5178	3.5189	37.8207
LPS H4AcK5 IgG	IL1a -10kb	24.4052	24.3906	24.3979	0.0103782	21.9094	2.48849	77.2523
L+D H4AcK5 IgG	IL1a -10kb	Undetermined	25.2772	25.2772	#DIV/0!	21.6527	3.6245	35.1512
Control IgG	Ccl2 TSS		35.0279	35.0279	#DIV/0!	25.4333	9.59459	0.00458828	0.996825
LPS IgG	Ccl2 TSS	35.7182	35.2608	35.4895	0.323483	26.5214	8.96806	-0.621941	1.53894
L+D IgG	Ccl2 TSS	35.0826		35.0826	#DIV/0!	26.0315	9.05106	-0.538939	1.4529
Control H4Ac	Ccl2 TSS	29.9663	30.2512	30.1088	0.201471	24.4105	5.69829	-3.89171	14.843
LPS H4Ac	Ccl2 TSS	29.4354	29.491	29.4632	0.0393308	24.5664	4.89678	-4.69322	25.8702
L+D H4Ac	Ccl2 TSS	29.3757	29.593	29.4844	0.153606	24.6953	4.78905	-4.80095	27.8761
Control H4AcK5	Ccl2 TSS	29.7269	29.8503	29.7886	0.0872177	25.0721	4.71653	-4.87347	29.3131
LPS H4AcK5	Ccl2 TSS	29.661	29.8021	29.7315	0.0997997	25.1184	4.61314	-4.97686	31.4909
L+D H4AcK5	Ccl2 TSS	29.7751	30.0717	29.9234	0.209735	24.5541	5.36937	-4.22063	18.6438
Control IgG	Il1a -20kb	38.0188	37.563	37.7909	0.322307	25.4333	12.3576	0	1
LPS IgG	Il1a -20kb	38.5844	38.7331	38.6587	0.105115	26.5214	12.1373	-0.22027	1.16495
L+D IgG	Il1a -20kb	38.2913		38.2913	#DIV/0!	26.0315	12.2598	-0.0977917	1.07013
Control H4Ac	Il1a -20kb	31.5316		31.5316	#DIV/0!	24.4105	7.1211	-5.23647	37.6994
LPS H4Ac	Il1a -20kb	29.103	28.968	29.0355	0.0954515	24.5664	4.46912	-7.88845	236.952
L+D H4Ac	Il1a -20kb	29.8838	29.5205	29.7022	0.256858	24.6953	5.00684	-7.35073	163.226
Control H4AcK5	Il1a -20kb	31.6685	31.562	31.6152	0.0752857	25.0721	6.54315	-5.81441	56.2747
LPS H4AcK5	Il1a -20kb	30.1871	29.8688	30.0279	0.225049	25.1184	4.90952	-7.44805	174.617
L+D H4AcK5	Il1a -20kb	30.6596	30.5413	30.6004	0.0836773	24.5541	6.04638	-6.31119	79.4067
Control IgG	Tnf -200bp	33.8751	34.1245	33.9998	0.176324	25.4333	8.56648	0	1
LPS IgG	Tnf -200bp	34.9966		34.9966	#DIV/0!	26.5214	8.47521	-0.0912704	1.06531
L+D IgG	Tnf -200bp	34.5331	34.7636	34.6483	0.16299	26.0315	8.6168	0.0503235	0.96572
Control H4Ac	Tnf -200bp	26.2756	26.0159	26.1458	0.183632	24.4105	1.73528	-6.8312	113.866
LPS H4Ac	Tnf -200bp	25.6161	25.6371	25.6266	0.0148869	24.5664	1.06021	-7.50627	181.808
L+D H4Ac	Tnf -200bp	26.1381	26.2468	26.1924	0.0768327	24.6953	1.49711	-7.06936	134.304
Control H4AcK5	Tnf -200bp	27.3141	27.1467	27.2304	0.118313	25.0721	2.15834	-6.40814	84.9261
LPS H4AcK5	Tnf -200bp	26.8469	26.7213	26.7841	0.0888159	25.1184	1.66569	-6.90079	119.494
L+D H4AcK5	Tnf -200bp	26.8333	26.86	26.8467	0.0188953	24.5541	2.29262	-6.27385	77.3781
Control IgG	Ccl2 -12.5kb		33.4885	33.4885	#DIV/0!	25.4333	8.05521	0	1
LPS IgG	Ccl2 -12.5kb	33.5636	33.2428	33.4032	0.2268	26.5214	6.88176	-1.17345	2.2555
L+D IgG	Ccl2 -12.5kb	32.802	33.3783	33.0901	0.407458	26.0315	7.05859	-0.996622	1.99532
Control H4Ac	Ccl2 -12.5kb	25.8557	26.1606	26.0082	0.215658	24.4105	1.59766	-6.45755	87.8853
LPS H4Ac	Ccl2 -12.5kb	24.6525		24.6525	#DIV/0!	24.5664	0.0861549	-7.96906	250.568
L+D H4Ac	Ccl2 -12.5kb	25.5205	25.6413	25.5809	0.0854077	24.6953	0.885561	-7.16965	143.973
Control H4AcK5	Ccl2 -12.5kb	25.7372	25.9841	25.8607	0.174542	25.0721	0.788592	-7.26662	153.982
LPS H4AcK5	Ccl2 -12.5kb	25.6698	25.9923	25.831	0.228038	25.1184	0.712595	-7.34262	162.311
L+D H4AcK5	Ccl2 -12.5kb	26.1177	26.6469	26.3823	0.374183	24.5541	1.82827	-6.22694	74.9027
FIG 4B-BRD4 inhibitor experiments
				Average	SD	b-actin
Control	TNFa	30.9844	30.4794	30.7319	0.357086	20.1747	10.5573	0.994977		Control	IL1a	32.027	32.17	32.0985	0.101093	20.1747	11.9238	0.997345		Control	IL1b	27.444	27.2025	27.3233	0.170795	20.1747	7.1486	0.994054		Control	CCL2.	27.6756	27.732	27.7038	0.03985	20.1747	7.52917	0.993667
LPS	TNFa	25.3321	25.6867	25.5094	0.250699	19.7899	5.71953	28.4523		LPS	IL1a	28.2216	28.2952	28.2584	0.0520342	19.7899	8.46857	10.9391		LPS	IL1b	22.3504	22.3805	22.3654	0.0213121	19.7899	2.57558	23.6606		LPS	CCL2.	25.6167	25.5651	25.5909	0.0364688	19.7899	5.80103	3.29201
10nM iBet	TNFa	30.5803	30.5101	30.5452	0.0495876	20.2111	10.3341	1.16146		10nM iBet	IL1a	31.4006	31.601	31.5008	0.141693	20.2111	11.2897	1.54789		10nM iBet	IL1b	25.5801	25.7128	25.6465	0.0938452	20.2111	5.43534	3.25952		10nM iBet	CCL2.	27.1135	27.0907	27.1021	0.0161345	20.2111	6.89094	1.54656
10nM Ibet+ LPS	TNFa	24.9907	26.5725	25.7816	1.1185	19.5948	6.18679	20.5806		10nM Ibet+ LPS	IL1a	28.0984	28.0087	28.0535	0.0634779	19.5948	8.45875	11.0139		10nM Ibet+ LPS	IL1b	22.2132	22.9723	22.5927	0.5367	19.5948	2.99796	17.6555		10nM Ibet+ LPS	CCL2.	25.3748	25.2795	25.3272	0.067412	19.5948	5.73237	3.45247
100nM iBet	TNFa	29.6314	29.7115	29.6715	0.05664	18.9472	10.7242	0.886233		100nM iBet	IL1a	31.8831	31.8445	31.8638	0.0272505	18.9472	12.9166	0.501183		100nM iBet	IL1b	25.8839	25.9712	25.9276	0.0617515	18.9472	6.98036	1.11701		100nM iBet	CCL2.	27.4815	27.3528	27.4171	0.0909927	18.9472	8.46989	0.51767
100nM Ibet+LPS	TNFa	24.9919	24.7498	24.8708	0.17124	19.8275	5.04334	45.4643		100nM Ibet+LPS	IL1a	29.1779	28.9313	29.0546	0.174421	19.8275	9.22711	6.46608		100nM Ibet+LPS	IL1b	22.727	22.7987	22.7628	0.0506504	19.8275	2.93534	18.4387		100nM Ibet+LPS	CCL2.	25.0616	24.838	24.9498	0.158108	19.8275	5.12233	5.26951
1uM iBet	TNFa	30.5164	30.7586	30.6375	0.17127	19.7968	10.8406	0.81755		1uM iBet	IL1a	34.7354	34.0045	34.3699	0.516832	19.7968	14.5731	0.15898		1uM iBet	IL1b	27.986	27.7947	27.8903	0.135277	19.7968	8.0935	0.516378		1uM iBet	CCL2.	28.0158	27.993	28.0044	0.0161264	19.7968	8.2076	0.620887
1uM iBet+ LPS	TNFa	25.3862	25.456	25.4211	0.0493988	19.8179	5.6032	30.8416		1uM iBet+ LPS	IL1a	29.9745	30.0737	30.0241	0.0701836	19.8179	10.2062	3.28021		1uM iBet+ LPS	IL1b	23.3903	23.37	23.3802	0.0143609	19.8179	3.56228	11.9399		1uM iBet+ LPS	CCL2.	23.6673	23.6549	23.6611	0.00870855	19.8179	3.84321	12.7886
				#DIV/0!	#DIV/0!		#DIV/0!
Control	TNFa	29.8981	29.8714	29.8848	0.0188643	17.056	12.8288	0.993949		Control	IL1a	30.2887	30.2596	30.2741	0.0205636	17.056	13.2181	0.994377		Control	IL1b	26.1424	25.9752	26.0588	0.118255	17.056	9.00282	0.998051		Control	CCL2.	25.3141	25.3359	25.325	0.0154561	17.056	8.269	1.00069
LPS	TNFa	24.3206	24.3052	24.3129	0.0108678	16.7461	7.56678	38.1397		LPS	IL1a	26.1369	26.1313	26.1341	0.00392471	16.7461	9.38796	14.1433		LPS	IL1b	20.9498	20.9451	20.9475	0.00332994	16.7461	4.20138	27.8311		LPS	CCL2.	23.2873	23.5053	23.3963	0.154168	16.7461	6.6502	3.07331
10nM iBet	TNFa	29.7828	29.811	29.7969	0.0199365	16.9566	12.8404	0.985984		10nM iBet	IL1a	30.3022	30.3886	30.3454	0.0610529	16.9566	13.3888	0.88342		10nM iBet	IL1b	24.3171	24.4896	24.4034	0.121952	16.9566	7.4468	2.93468		10nM iBet	CCL2.	25.0602	24.9833	25.0218	0.0543715	16.9566	8.0652	1.15253
10nM iBet+ LPS	TNFa	24.791	24.5352	24.6631	0.180862	16.8514	7.81177	32.1831		10nM iBet+ LPS	IL1a	27.6679	27.5301	27.599	0.0974287	16.8514	10.7477	5.51112		10nM iBet+ LPS	IL1b	21.5669	21.9808	21.7739	0.292658	16.8514	4.92249	16.8831		10nM iBet+ LPS	CCL2.	23.4079	23.7222	23.5651	0.222241	16.8514	6.7137	2.94098
100nM iBet	TNFa	29.6236	29.6865	29.655	0.0444342	16.7603	12.8947	0.949523		100nM iBet	IL1a	30.3359	30.5665	30.4512	0.163085	16.7603	13.6909	0.716525		100nM iBet	IL1b	24.3467	24.3493	24.348	0.00178568	16.7603	7.58771	2.6616		100nM iBet	CCL2.	25.3933	25.1225	25.2579	0.191488	16.7603	8.49764	0.854033
100nM iBet+LPS	TNFa	24.7222	24.7519	24.7371	0.0209912	17.1001	7.63697	36.3285		100nM iBet+LPS	IL1a	28.3233	28.3538	28.3386	0.0216075	17.1001	11.2384	3.92191		100nM iBet+LPS	IL1b	22.3435	22.1743	22.2589	0.11968	17.1001	5.1588	14.3324		100nM iBet+LPS	CCL2.	23.6982	23.6449	23.6715	0.0376854	17.1001	6.57142	3.24581
1uM iBet	TNFa	31.023	31.0713	31.0471	0.0341504	17.3983	13.6489	0.562967		1uM iBet	IL1a	31.3495	31.3591	31.3543	0.00683521	17.3983	13.956	0.596242		1uM iBet	IL1b	25.0522	25.0624	25.0573	0.00720745	17.3983	7.65902	2.53324		1uM iBet	CCL2.	25.4316	25.3538	25.3927	0.0550026	17.3983	7.99442	1.21048
1uM iBet + LPS	TNFa	25.7249	25.6053	25.6651	0.0845419	17.4596	8.20549	24.4967		1uM iBet + LPS	IL1a	29.6544	29.3257	29.4901	0.232405	17.4596	12.0305	2.26501		1uM iBet + LPS	IL1b	23.3904	23.3927	23.3915	0.00167913	17.4596	5.93195	8.38637		1uM iBet + LPS	CCL2.	22.9953	22.9619	22.9786	0.0236427	17.4596	5.519	6.73183
				#DIV/0!	#DIV/0!		#DIV/0!
Control	TNFa	31.3302	31.9289	31.6295	0.423328	20.4312	11.1984	0.994225		Control	IL1a	31.8725	31.9843	31.9284	0.0790931	20.4312	11.4972	0.99502		Control	IL1b	26.9554	27.2379	27.0967	0.199787	20.4312	6.66548	0.996206		Control	CCL2.	27.5742	27.7127	27.6434	0.0979034	20.4312	7.21225	0.998442
LPS	TNFa	26.4443	26.3905	26.4174	0.0380495	20.5441	5.87326	39.8563		LPS	IL1a	29.4623	29.0174	29.2399	0.31462	20.5441	8.69573	6.93678		LPS	IL1b	23.0197	23.262	23.1408	0.171336	20.5441	2.5967	16.7177		LPS	CCL2.	26.1247	26.1459	26.1353	0.0150353	20.5441	5.59117	3.07125
10nM iBet	TNFa	30.3542	30.2242	30.2892	0.0919314	19.4712	10.818	1.29414		10nM iBet	IL1a	31.779	31.773	31.776	0.00424166	19.4712	12.3048	0.568487		10nM iBet	IL1b	25.5128	25.456	25.4844	0.0401818	19.4712	6.01319	1.5657		10nM iBet	CCL2.	26.9668	26.9875	26.9772	0.0146388	19.4712	7.50592	0.814553
10nM Ibet+ LPS	TNFa	25.945	25.8657	25.9053	0.0560425	20.1066	5.79877	41.9684		10nM Ibet+ LPS	IL1a	29.2429	29.3726	29.3078	0.0916697	20.1066	9.20121	4.88647		10nM Ibet+ LPS	IL1b	22.7819	22.7997	22.7908	0.0126076	20.1066	2.68422	15.7336		10nM Ibet+ LPS	CCL2.	25.7812	25.8503	25.8158	0.0488189	20.1066	5.70921	2.82998
100nM iBet	TNFa	30.0913	29.9614	30.0264	0.0918464	19.171	10.8554	1.26103		100nM iBet	IL1a	32.4462	32.0403	32.2432	0.287046	19.171	13.0722	0.333961		100nM iBet	IL1b	25.498	25.5159	25.5069	0.0126697	19.171	6.33593	1.25186		100nM iBet	CCL2.	27.3344	27.3683	27.3514	0.0240001	19.171	8.18039	0.510369
100nM Ibet+LPS	TNFa	25.1543	25.3795	25.2669	0.159226	19.4202	5.84666	40.598		100nM Ibet+LPS	IL1a	30.0632	30.0243	30.0438	0.0274919	19.4202	10.6236	1.82317		100nM Ibet+LPS	IL1b	23.0296	23.0424	23.036	0.00906865	19.4202	3.61583	8.24872		100nM Ibet+LPS	CCL2.	25.4343	25.5745	25.5044	0.0991199	19.4202	6.08422	2.18219
1uM iBet	TNFa	29.4106	29.2132	29.3119	0.139585	19.4042	9.90766	2.43232		1uM iBet	IL1a	32.8358	32.4734	32.6546	0.25628	19.4042	13.2504	0.295172		1uM iBet	IL1b	26.0719	25.9773	26.0246	0.0668672	19.4042	6.62034	1.02787		1uM iBet	CCL2.	26.7093	26.7288	26.719	0.0137608	19.4042	7.3148	0.929936
1uM iBet+ LPS	TNFa	25.5996	29.3221	27.4608	2.63216	18.854	8.60685	5.99247		1uM iBet+ LPS	IL1a	30.8981	30.4037	30.6509	0.349648	18.854	11.7969	0.808365		1uM iBet+ LPS	IL1b	23.415	23.2969	23.356	0.0835587	18.854	4.50196	4.46307		1uM iBet+ LPS	CCL2.	24.1267	24.1911	24.1589	0.0454903	18.854	5.30491	3.74533
				#DIV/0!	#DIV/0!		#DIV/0!
Control	TNFa	29.0068	28.968	28.9874	0.0274555	18.4169	10.5706	0.999606		Control	IL1a	30.6614	30.6834	30.6724	0.0155465	18.4169	12.2555	0.996179		Control	IL1b	26.0081	26.0262	26.0172	0.012787	18.4169	7.6003	0.999792		Control	CCL2.	26.5299	26.5956	26.5628	0.0465058	18.4169	8.1459	0.995916
LPS	TNFa	23.3701	23.4121	23.3911	0.0297334	18.2736	5.11749	43.7896		LPS	IL1a	26.9859	26.8974	26.9417	0.0625999	18.2736	8.66803	11.9751		LPS	IL1b	21.1129	21.1509	21.1319	0.0268486	18.2736	2.85825	26.7553		LPS	CCL2.	24.7552	24.7818	24.7685	0.0188009	18.2736	6.49486	3.12777
10nM iBet	TNFa	28.7325	28.6784	28.7054	0.0381965	18.271	10.4344	1.09854		10nM iBet	IL1a	30.5354	30.5453	30.5403	0.00698626	18.271	12.2693	0.986703		10nM iBet	IL1b	25.0802	25.1622	25.1212	0.057932	18.271	6.85018	1.68159		10nM iBet	CCL2.	26.2662	26.4787	26.3724	0.150294	18.271	8.1014	1.02712
10nM Ibet+ LPS	TNFa	24.0996	24.0761	24.0878	0.0166173	18.692	5.39586	36.1053		10nM Ibet+ LPS	IL1a	27.6712	27.5658	27.6185	0.0745912	18.692	8.92652	10.0107		10nM Ibet+ LPS	IL1b	21.6415	22.1581	21.8998	0.365305	18.692	3.20786	20.9974		10nM Ibet+ LPS	CCL2.	25.0785	25.0423	25.0604	0.0256442	18.692	6.36841	3.4143
100nM iBet	TNFa	27.5581	27.2761	27.4171	0.199369	18.3243	9.09279	2.78409		100nM iBet	IL1a	30.513	30.7878	30.6504	0.194292	18.3243	12.3261	0.948617		100nM iBet	IL1b	24.399	24.4249	24.412	0.0183491	18.3243	6.08766	2.85272		100nM iBet	CCL2.	26.5702	26.4962	26.5332	0.0523066	18.3243	8.2089	0.953366
100nM Ibet+LPS	TNFa	23.7363	23.7209	23.7286	0.0108759	18.4378	5.29088	38.8306		100nM Ibet+LPS	IL1a	27.8468	27.8856	27.8662	0.0273948	18.4378	9.42847	7.06913		100nM Ibet+LPS	IL1b	21.8254	21.8064	21.8159	0.0134128	18.4378	3.37817	18.6593		100nM Ibet+LPS	CCL2.	24.5223	24.3824	24.4523	0.0989298	18.4378	6.01457	4.36332
1uM iBet	TNFa	28.343	28.457	28.4	0.0806293	18.4428	9.95719	1.52924		1uM iBet	IL1a	32.1749	32.1638	32.1694	0.00779818	18.4428	13.7265	0.359348		1uM iBet	IL1b	26.0053	26.2653	26.1353	0.183838	18.4428	7.69252	0.937886		1uM iBet	CCL2.	26.5576	26.4474	26.5025	0.0779319	18.4428	8.05972	1.05723
1uM iBet+ LPS	TNFa	23.5394	23.6078	23.5736	0.0483293	18.3886	5.18501	41.7873		1uM iBet+ LPS	IL1a	28.9676	29.2153	29.0914	0.175199	18.3886	10.7028	2.92241		1uM iBet+ LPS	IL1b	22.4242	22.4971	22.4607	0.0515945	18.3886	4.07206	11.535		1uM iBet+ LPS	CCL2.	23.5187	23.4892	23.504	0.0208522	18.3886	5.11538	8.13771
Control	TNFa	29.9529	30.3175	30.1352	0.257786	16.5964	13.5388	0.993936		Control	IL1a	30.0784	30.0724	30.0754	0.00420659	16.5964	13.4789	0.993826		Control	IL1b	25.5452	25.4253	25.4852	0.0847401	16.5964	8.8888	0.993918		Control	CCL2.	26.2383	25.9842	26.1112	0.179689	16.5964	9.51479	0.996686
LPS	TNFa	24.384	24.1816	24.2828	0.143123	16.4988	7.78404	53.6668		LPS	IL1a	26.3378	26.1435	26.2407	0.137384	16.4988	9.7419	13.2517		LPS	IL1b	20.9887	21.2891	21.1389	0.212434	16.4988	4.64015	18.8939		LPS	CCL2.	24.0093	24.133	24.0711	0.0874604	16.4988	7.57236	3.83079
10nM iBet	TNFa	29.5826	29.8039	29.6932	0.156457	16.5651	13.1281	1.32123		10nM iBet	IL1a	30.255	30.1592	30.2071	0.0677344	16.5651	13.642	0.887612		10nM iBet	IL1b	24.8124	24.8314	24.8219	0.0134951	16.5651	8.25678	1.54031		10nM iBet	CCL2.	25.9773	25.2234	25.6003	0.533052	16.5651	9.03521	1.38971
10nM iBet+ LPS	TNFa	24.2156	23.9947	24.1052	0.156171	16.2624	7.84278	51.5256		10nM iBet+ LPS	IL1a	27.1911	26.8331	27.0121	0.253145	16.2624	10.7498	6.58986		10nM iBet+ LPS	IL1b	21.4138	21.4638	21.4388	0.0353669	16.2624	5.17639	13.0286		10nM iBet+ LPS	CCL2.	24.3904	23.4829	23.9367	0.641747	16.2624	7.67428	3.5695
100nM iBet	TNFa	29.7765	29.9937	29.8851	0.153571	16.5234	13.3617	1.12372		100nM iBet	IL1a	30.6075	30.711	30.6593	0.0732074	16.5234	14.1359	0.6303		100nM iBet	IL1b	24.3783	24.3024	24.3404	0.0536513	16.5234	7.81702	2.08925		100nM iBet	CCL2.	25.9508	25.4299	25.6904	0.368299	16.5234	9.167	1.26839
100nM iBet+LPS	TNFa	24.5399	24.0465	24.2932	0.348919	16.3908	7.90239	49.4402		100nM iBet+LPS	IL1a	27.9169	27.9832	27.9501	0.0468875	16.3908	11.5592	3.76013		100nM iBet+LPS	IL1b	22.2072	22.3961	22.3016	0.133598	16.3908	5.91079	7.83106		100nM iBet+LPS	CCL2.	23.6616	23.6127	23.6371	0.0346036	16.3908	7.2463	4.80221
1uM iBet	TNFa	29.7573	29.4103	29.5838	0.245399	16.67	12.9139	1.53277		1uM iBet	IL1a	32.1403	32.8465	32.4934	0.49935	16.67	15.8235	0.195677		1uM iBet	IL1b	25.1384	25.0432	25.0908	0.0673028	16.67	8.42081	1.37477		1uM iBet	CCL2.	25.3785	25.1811	25.2798	0.139589	16.67	8.6098	1.86633
1uM iBet + LPS	TNFa	25.3009	25.2448	25.2728	0.0396679	17.4237	7.84914	51.2992		1uM iBet + LPS	IL1a	29.6129	29.3569	29.4849	0.180995	17.4237	12.0613	2.65507		1uM iBet + LPS	IL1b	23.3248	23.3991	23.362	0.0524806	17.4237	5.93827	7.68331		1uM iBet + LPS	CCL2.	22.8888	22.9455	22.9172	0.040113	17.4237	5.49349	16.1841
										Control	IL1a	30.0788	30.1362	30.1075	0.0406323	17.4847	12.6228	0.998078		Control	IL1b	25.5728	25.4148	25.4938	0.111701	17.4847	8.00906	0.999962
										LPS	IL1a	26.9631	26.4874	26.7252	0.336348	17.7418	8.98341	12.4372		LPS	IL1b	21.5774	21.4028	21.4901	0.123415	17.7418	3.74829	19.1691		Control	CCL2.	25.3171	25.5197	25.4184	0.143225	17.4847	7.93369	0.997447
										10nM iBet	IL1a	29.8123	29.9593	29.8858	0.10394	17.0123	12.8735	0.838863		10nM iBet	IL1b	24.1616	24.6009	24.3812	0.310624	17.0123	7.36895	1.55839		LPS	CCL2.	23.8892	23.8589	23.8741	0.0213593	17.7418	6.13225	3.47678
										10nM iBet+ LPS	IL1a	28.1964	28.1142	28.1553	0.0581411	17.32	10.8353	3.44548		10nM iBet+ LPS	IL1b	22.03	22.2672	22.1486	0.167722	17.32	4.82855	9.06588		10nM iBet	CCL2.	25.4578	25.5069	25.4824	0.0347708	17.0123	8.47007	0.687736
										100nM iBet	IL1a	30.5928	30.8588	30.7258	0.188091	16.8521	13.8736	0.419394		100nM iBet	IL1b	23.483	23.4138	23.4484	0.0489362	16.8521	6.59629	2.66237		10nM iBet+ LPS	CCL2.	24.1735	24.0534	24.1134	0.0849438	17.32	6.79342	2.1986
										100nM iBet+LPS	IL1a	31.147	31.292	31.2195	0.102508	19.2629	11.9566	1.58383		100nM iBet+LPS	IL1b	26.4429	26.3598	26.4014	0.0587291	19.2629	7.13848	1.82832		100nM iBet	CCL2.	25.4964	25.363	25.4297	0.0943321	16.8521	8.57756	0.638358
										1uM iBet	IL1a	31.9621	31.752	31.857	0.148515	16.3823	15.4748	0.13824		1uM iBet	IL1b	23.7681	23.8693	23.8187	0.0715431	16.3823	7.43641	1.48719		100nM iBet+LPS	CCL2.	26.454	26.2654	26.3597	0.133386	19.2629	7.09679	1.78164
										1uM iBet + LPS	IL1a	29.4712	29.4795	29.4753	0.00586549	16.5742	12.9011	0.822965		1uM iBet + LPS	IL1b	22.499	22.6838	22.5914	0.130712	16.5742	6.01716	3.97743		1uM iBet	CCL2.	24.9255	25.1577	25.0416	0.16416	16.3823	8.65932	0.603189
																														1uM iBet + LPS	CCL2.	23.056	22.9749	23.0155	0.0573602	16.5742	6.44126	2.80644
FIG 4C-BRD4 ChIP
									Over control
Control IgG	tnfa tss	34.7356	34.0226	34.3791	0.504136	22.7208	11.6583	0.994281	0.422212		Control IgG	il1b tss	30.8219	31.0446	30.9333	0.157448	22.7208	8.21243	0.998315	0.526914		Control IgG	il1a tss	30.9269	30.5437	30.7353	0.271013	22.7208	8.01448	0.996897	0.420631
LPS IgG	tnfa tss	33.1832	33.0685	33.1259	0.0811081	22.1718	10.9541	1.61994	0.687891		LPS IgG	il1b tss	30.0659	30.0405	30.0532	0.0179215	22.1718	7.8814	1.2558	0.662814		LPS IgG	il1a tss	30.0095	29.6643	29.8369	0.244127	22.1718	7.66511	1.27006	0.535888
LPS+ Dex IgG	tnfa tss	33.4894	34.3868	33.9381	0.634614	22.5844	11.3537	1.22798	0.521452		LPS+ Dex IgG	il1b tss	30.4485	30.6157	30.5321	0.118261	22.5844	7.94769	1.1994	0.633047		LPS+ Dex IgG	il1a tss	29.9687	29.316	29.6424	0.461536	22.5844	7.05799	1.93457	0.816272
Control BRD4	tnfa tss	32.9459	32.6411	32.7935	0.215563	22.3792	10.4143	2.35493	1		Control BRD4	il1b tss	29.9184	29.4161	29.6672	0.35521	22.3792	7.28807	1.89464	1		Control BRD4	il1a tss	29.3998	28.8887	29.1443	0.361397	22.3792	6.76511	2.37	1
LPS BRD4	tnfa tss	33.1643	33.6287	33.3965	0.328387	23.0265	10.37	2.42835	1.03118		LPS BRD4	il1b tss	28.621	28.7025	28.6618	0.0576394	23.0265	5.63532	5.95738	3.14433		LPS BRD4	il1a tss	28.143	28.3351	28.2391	0.135849	23.0265	5.21264	6.95169	2.9332
LPS+ Dex BRD4	tnfa tss	32.8322	32.6	32.7161	0.164204	22.8751	9.84094	3.50413	1.488		LPS+ Dex BRD4	il1b tss	28.8377	29.8906	29.3642	0.744514	22.8751	6.48906	3.29651	1.73991		LPS+ Dex BRD4	il1a tss	29.6067	29.586	29.5963	0.01469	22.8751	6.72121	2.44322	1.0309
Control IgG	tnfa tss	34.9387	34.6358	34.7873	0.214192	22.7993	11.9879	0.99451	0.319453		Control IgG	il1b tss	31.5749	31.7139	31.6444	0.0982298	22.7993	8.84507	0.996491	0.493943		Control IgG	il1a tss	32.789	33.3759	33.0825	0.41503	22.7993	10.2831	0.997827	1.04141
LPS IgG	tnfa tss	33.4691	33.5096	33.4894	0.0286221	22.498	10.9914	1.9843	0.637388		LPS IgG	il1b tss	30.6196	30.8937	30.7567	0.193854	22.498	8.25867	1.49623	0.741652		LPS IgG	il1a tss	32.2446	32.3832	32.3139	0.0980073	22.498	9.81594	1.37942	1.43967
L+D IgG	tnfa tss	34.6132	34.3291	34.4711	0.200881	22.3564	12.1147	0.910849	0.292579		L+D IgG	il1b tss	30.957	31.9027	31.4298	0.668719	22.3564	9.07343	0.850612	0.421633		L+D IgG	il1a tss		32.6358	32.6358	#DIV/0!	22.3564	10.2794	1.0004	1.0441
Control BRD4	tnfa tss	33.2635	33.5064	33.385	0.171776	23.0433	10.3416	3.11317	1		Control BRD4	il1b tss	30.9412	30.8005	30.8708	0.0994598	23.0433	7.82749	2.01742	1		Control BRD4	il1a tss	33.5567	33.2133	33.385	0.242787	23.0433	10.3417	0.958149	1
LPS BRD4	tnfa tss	32.9437	32.3964	32.6701	0.386977	22.6899	9.98019	3.99947	1.2847		LPS BRD4	il1b tss	29.6541	29.0386	29.3464	0.435249	22.6899	6.6565	4.54254	2.25165		LPS BRD4	il1a tss	31.4794	31.936	31.7077	0.322865	22.6899	9.01783	2.39857	2.50333
L+D BRD4	tnfa tss	32.7788	32.3215	32.5501	0.323302	22.7137	9.83644	4.41851	1.4193		L+D BRD4	il1b tss	29.9086	29.9489	29.9288	0.0285128	22.7137	7.21507	3.08427	1.52882		L+D BRD4	il1a tss	31.9899	32.1081	32.049	0.0835641	22.7137	9.33531	1.92477	2.00884
Control IgG	TNFa	34.6263		34.6263	#DIV/0!	21.4694	13.1569	0.995239	0.242737		Control IgG	IL1b	30.8642	29.9726	30.4184	0.630471	21.4694	8.94901	1.00069	0.686559		Control IgG	IL1a	32.8698	32.1291	32.4995	0.523746	21.4694	11.0301	0.999932	0.492626
LPS IgG	TNFa	33.832	33.6437	33.7379	0.133138	21.4207	12.3172	1.78117	0.434423		LPS IgG	IL1b	29.814	30.0757	29.9449	0.185035	21.4207	8.5242	1.34332	0.92163		LPS IgG	IL1a	31.1673	31.2937	31.2305	0.0893891	21.4207	9.80978	2.32983	1.14781
L+ D IgG	TNFa	32.736	33.6132	33.1746	0.620288	20.9269	12.2477	1.86906	0.45586		L+ D IgG	IL1b	29.9926	29.7474	29.87	0.17337	20.9269	8.94315	1.00476	0.689352		L+ D IgG	IL1a	30.7204	30.2351	30.4778	0.343155	20.9269	9.55089	2.78777	1.37342
Control BRD4	TNFa		32.2857	32.2857	#DIV/0!	21.1714	11.1143	4.10008	1		Control BRD4	IL1b	29.6729	29.4827	29.5778	0.134541	21.1714	8.40646	1.45754	1		Control BRD4	IL1a	31.1739	31.1861	31.18	0.00860065	21.1714	10.0087	2.0298	1
LPS BRD4	TNFa	32.6594	32.6002	32.6298	0.0418043	21.8795	10.7503	5.27708	1.28707		LPS BRD4	IL1b	28.7695	28.7676	28.7686	0.00133386	21.8795	6.88904	4.17264	2.86279		LPS BRD4	IL1a	30.5765	30.8423	30.7094	0.187951	21.8795	8.82987	4.59521	2.26387
L+ D BRD4	TNFa	33.6266	33.4509	33.5387	0.124212	21.988	11.5507	3.02991	0.738989		L+ D BRD4	IL1b	29.7328	29.8143	29.7735	0.057611	21.988	7.78553	2.24152	1.53787		L+ D BRD4	IL1a	31.2301	30.3636	30.7969	0.612671	21.988	8.80885	4.66266	2.2971
Tnf TSS	Control IgG	34.6367	35.2388	34.9377	0.42576	26.9947	7.94307	0.997875	0.598388		Il1b TSS	Control IgG	32.7115	33.0148	32.8632	0.214457	26.9947	5.86848	0.994136	0.808453		Il1a TSS	Control IgG	32.8413	33.0717	32.9565	0.162966	26.9947	5.96181	0.998747	1.01724		Il1a -10kb	Control IgG	32.6308	32.6597	32.6453	0.0204112	26.9947	5.65058	0.9996	0.912734		Il1b -10kb	Control IgG	32.1076	32.6049	32.3563	0.351663
	LPS IgG		34.8475	34.8475	#DIV/0!	26.719	8.12852	0.877507	0.526208			LPS IgG	32.9473	32.9312	32.9392	0.011383	26.719	6.22019	0.779062	0.633551			LPS IgG	32.7491	33.1862	32.9676	0.309065	26.719	6.2486	0.818697	0.833855			LPS IgG	32.3789	32.168	32.2734	0.149139	26.719	5.55441	1.06851	0.975652			LPS IgG	31.9798	31.9495	31.9646	0.0214187
	L+D IgG	35.262	35.9212	35.5916	0.466132	26.8375	8.75412	0.568755	0.341061			L+D IgG	33.4018	33.0596	33.2307	0.242029	26.8375	6.39318	0.69103	0.561961			L+D IgG	33.1251	34.3031	33.7141	0.832946	26.8375	6.87655	0.529775	0.539584			L+D IgG	32.6451	32.812	32.7285	0.117979	26.8375	5.89101	0.84615	0.77262			L+D IgG	33.3713	33.2243	33.2978	0.103974
	Control BRD4	33.3828	33.7108	33.5468	0.231955	26.3446	7.20222	1.66761	1			Control BRD4	31.92	31.8925	31.9063	0.0194536	26.3446	5.56172	1.22968	1			Control BRD4	32.1688	32.4932	32.331	0.229357	26.3446	5.98647	0.981821	1			Control BRD4	31.6946	32.0322	31.8634	0.238775	26.3446	5.51884	1.09517	1			Control BRD4	30.7073	30.84	30.7736	0.093825
	LPS BRD4	32.9152	33.127	33.0211	0.149749	26.9494	6.07173	3.65094	2.18933			LPS BRD4	30.5787	30.561	30.5699	0.0125456	26.9494	3.6205	4.72233	3.8403			LPS BRD4	31.8549	31.7651	31.81	0.0635197	26.9494	4.86065	2.14259	2.18226			LPS BRD4	31.1477	30.8688	31.0083	0.197242	26.9494	4.05892	3.01276	2.75095			LPS BRD4	30.0226	30.0107	30.0166	0.0083943
	L+D BRD4	33.2827	34.3275	33.8051	0.738796	27.0104	6.7947	2.21192	1.32641			L+D BRD4	31.3181	31.0894	31.2037	0.161681	27.0104	4.19335	3.17476	2.58178			L+D BRD4	32.2549	32.2063	32.2306	0.0343325	27.0104	5.22022	1.66992	1.70084			L+D BRD4	31.5262	31.4935	31.5099	0.0231396	27.0104	4.49947	2.21995	2.02704			L+D BRD4	30.7521	30.5582	30.6551	0.137152
Tnf TSS	Control IgG	36.9884	36.6646	36.8265	0.228915	26.6496	10.1769	0.99525	0.347188		Il1b TSS	Control IgG	32.7034	32.6626	32.683	0.0288756	26.6496	6.03341	0.99764	0.811077		Il1a TSS	Control IgG	32.8812	32.8231	32.8521	0.041111	26.6496	6.20252	0.998256	0.811834		Il1a -10kb	Control IgG	32.4602	32.387	32.4236	0.0517253	26.6496	5.77399	0.997239	0.883169		Il1b -10kb	Control IgG	31.8325	31.8442	31.8383	0.00829315
	LPS IgG	36.0786	36.8642	36.4714	0.555513	26.0751	10.3963	0.854828	0.298202			LPS IgG	32.9668	32.8895	32.9282	0.0546331	26.0751	6.85308	0.565235	0.459534			LPS IgG	33.1879	33.3327	33.2603	0.102428	26.0751	7.18519	0.505159	0.410822			LPS IgG	32.4415	32.0713	32.2564	0.261734	26.0751	6.18129	0.75195	0.665938			LPS IgG	32.2373	31.9672	32.1023	0.190946
	L+D IgG	36.7699	36.6356	36.7027	0.094943	26.0233	10.6794	0.702519	0.24507			L+D IgG	33.0997	32.9972	33.0485	0.0725169	26.0233	7.02512	0.501693	0.407874			L+D IgG	33.2632	33.7199	33.4916	0.322897	26.0233	7.46822	0.415172	0.33764			L+D IgG	32.6442	32.8773	32.7608	0.1648	26.0233	6.73741	0.511423	0.452923			L+D IgG		32.1882	32.1882	#DIV/0!
	Control BRD4	34.6828	34.9736	34.8282	0.205617	26.1776	8.65066	2.86661	1			Control BRD4	32.0245	31.7933	31.9089	0.163519	26.1776	5.73132	1.23002	1			Control BRD4	31.963	32.1957	32.0793	0.164524	26.1776	5.90178	1.22963	1			Control BRD4	31.941	31.6037	31.7723	0.238485	26.1776	5.59475	1.12916	1			Control BRD4	30.8883	31.002	30.9451	0.0803879
	LPS BRD4	34.5656	34.7029	34.6343	0.0970955	26.6184	8.01591	4.45089	1.55267			LPS BRD4	30.6568	30.9072	30.782	0.177092	26.6184	4.16364	3.64611	2.96428			LPS BRD4	31.6567	32.597	32.1269	0.664894	26.6184	5.50852	1.61494	1.31335			LPS BRD4	30.9775	31.4082	31.1929	0.304543	26.6184	4.57449	2.29025	2.02828			LPS BRD4	30.1556	30.7621	30.4588	0.428814
	L+D BRD4	35.0543	35.3432	35.1987	0.204271	26.7196	8.47909	3.2286	1.12628			L+D BRD4	31.5871	31.2798	31.4335	0.21732	26.7196	4.71386	2.49	2.02436			L+D BRD4	32.5909	33.3447	32.9678	0.532971	26.7196	6.24819	0.96715	0.786537			L+D BRD4	31.8632	31.9728	31.918	0.0775489	26.7196	5.19837	1.4862	1.3162			L+D BRD4	31.2007	30.8117	31.0062	0.27506
Control IgG	Tnf TSS	35.1858	35.3233	35.2546	0.0972304	27.996	7.25854	1	0.0865198		Control IgG	Il1b TSS	34.626	34.8143	34.7201	0.133146	27.996	6.72409	1	0.38757		Control IgG	Il1a TSS	33.7065	34.1927	33.9496	0.34381	27.996	5.95351	1	0.887571		Control IgG	Il1a -10kb		32.6102	32.6102	#DIV/0!	27.996	4.61412	1	0.23526		Control IgG	Il1b -10kb	32.8024		32.8024	#DIV/0!
LPS IgG	Tnf TSS		35.7105	35.7105	#DIV/0!	29.241	6.46945	1.72798	0.149504		LPS IgG	Il1b TSS		35.6472	35.6472	#DIV/0!	29.241	6.40622	1.24649	0.483102		LPS IgG	Il1a TSS	35.6215	35.3348	35.4781	0.202718	29.241	6.23711	0.821538	0.729173		LPS IgG	Il1a -10kb	33.452	33.6365	33.5442	0.130457	29.241	4.3032	1.2405	0.291839		LPS IgG	Il1b -10kb	34.5478	34.0621	34.305	0.343471
L+D IgG	Tnf TSS	34.9298	35.258	35.0939	0.232098	28.1062	6.98775	1.20647	0.104383		L+D IgG	Il1b TSS	35.4592	35.9763	35.7178	0.365673	28.1062	7.61157	0.540555	0.209503		L+D IgG	Il1a TSS	35.5255		35.5255	#DIV/0!	28.1062	7.41928	0.362043	0.321338		L+D IgG	Il1a -10kb		33.2343	33.2343	#DIV/0!	28.1062	5.12809	0.700292	0.164751		L+D IgG	Il1b -10kb	34.2389	34.6639	34.4514	0.300509
Control BRD4	Tnf TSS	31.4865	31.6469	31.5667	0.113432	27.839	3.72771	11.558	1		Control BRD4	Il1b TSS	33.2565	33.1348	33.1956	0.0860686	27.839	5.35662	2.58018	1		Control BRD4	Il1a TSS	33.6635	33.5775	33.6205	0.0607994	27.839	5.78145	1.12667	1		Control BRD4	Il1a -10kb	30.469	30.2619	30.3655	0.146474	27.839	2.52645	4.25062	1		Control BRD4	Il1b -10kb	30.6799	30.4629	30.5714	0.153498
LPS BRD4	Tnf TSS	30.7077	31.148	30.9278	0.311312	27.9515	2.97633	19.4569	1.68341		LPS BRD4	Il1b TSS	32.301	32.343	32.322	0.0297172	27.9515	4.37052	5.11085	1.98081		LPS BRD4	Il1a TSS	32.6987	33.0039	32.8513	0.215786	27.9515	4.89983	2.07582	1.84244		LPS BRD4	Il1a -10kb	29.0939	28.9402	29.017	0.10872	27.9515	1.06553	11.7012	2.75283		LPS BRD4	Il1b -10kb	29.5917	29.5539	29.5728	0.026742
L+D BRD4	Tnf TSS	31.8703	31.3712	31.6207	0.352951	27.6672	3.95354	9.88331	0.855102		L+D BRD4	Il1b TSS	32.9661	32.9964	32.9813	0.0214281	27.6672	5.31407	2.6574	1.02993		L+D BRD4	Il1a TSS	33.9232	34.1298	34.0265	0.146067	27.6672	6.35931	0.75482	0.669956		L+D BRD4	Il1a -10kb	29.822	29.8687	29.8454	0.0330391	27.6672	2.17817	5.41118	1.27303		L+D BRD4	Il1b -10kb	30.5258	30.2802	30.403	0.173613
											Control IgG	Il1b TSS	36.5517		36.5517	#DIV/0!	29.3835	7.16815	1	0.650877													Control IgG	Il1a -10kb	33.4824		33.4824	#DIV/0!	29.3835	4.0989	1	0.900544		Control IgG	Il1b -10kb	34.3432	34.8342	34.5887	0.347223
											LPS IgG	Il1b TSS	36.3532		36.3532	#DIV/0!	28.7296	7.62359	0.729287	0.474676													LPS IgG	Il1a -10kb	34.7686	34.7776	34.7731	0.00635777	28.7296	6.04345	0.259796	0.233957		LPS IgG	Il1b -10kb	35.0722	35.0528	35.0625	0.0137217
											L+D IgG	Il1b TSS	35.4017	35.2651	35.3334	0.0966532	28.5955	6.73793	1.34744	0.877015													L+D IgG	Il1a -10kb	33.0694		33.0694	#DIV/0!	28.5955	4.4739	0.771104	0.694413		L+D IgG	Il1b -10kb		34.0637	34.0637	#DIV/0!
											Control BRD4	Il1b TSS	33.8904	33.4951	33.6928	0.279518	27.1442	6.5486	1.53639	1													Control BRD4	Il1a -10kb	31.0964	31.0874	31.0919	0.00635642	27.1442	3.94777	1.11044	1		Control BRD4	Il1b -10kb	31.1532	31.1393	31.1462	0.00983471
											LPS BRD4	Il1b TSS	32.9433	32.9952	32.9693	0.0366738	27.9086	5.06065	4.30942	2.8049													LPS BRD4	Il1a -10kb	30.8879	30.5442	30.716	0.243002	27.9086	2.80742	2.44779	2.20434		LPS BRD4	Il1b -10kb	30.6641		30.6641	#DIV/0!
											L+D BRD4	Il1b TSS	33.6472	33.7219	33.6845	0.0527827	28.4451	5.23938	3.80728	2.47807													L+D BRD4	Il1a -10kb	31.5103	31.2434	31.3769	0.188706	28.4451	2.93172	2.24572	2.02237		L+D BRD4	Il1b -10kb		31.2972	31.2972	#DIV/0!
FIG 5C- Med1 and Med12 ChIP
Med1
Control IgG	TNFa TSS	33.9476	33.5548	33.7512	0.277756	25.2235	8.52768	0.994692		Control IgG	IL1b TSS	31.9826	31.7803	31.8815	0.143063	25.2235	6.65795	0.994506		Control IgG	IL1b -10kb	31.3713	31.1719	31.2716	0.141046	25.2235	6.04808	0.994413		Control IgG	IL1a TSS	31.333	32.0234	31.6782	0.488143	25.2235	6.45468	0.996764		Control IgG	IL1a -10kb	32.7849	31.968	32.3764	0.577657	25.2235	7.15292	0.997979
LPS IgG	TNFa TSS	33.7567	33.5099	33.6333	0.174511	26.1476	7.48574	2.04806		LPS IgG	IL1b TSS	31.4207	31.2539	31.3373	0.11794	26.1476	5.18974	2.75158		LPS IgG	IL1b -10kb	30.6709	31.5941	31.1325	0.652804	26.1476	4.98495	2.0778		LPS IgG	IL1a TSS	31.7435	32.0975	31.9205	0.250333	26.1476	5.77288	1.59895		LPS IgG	IL1a -10kb	31.3162	31.5719	31.444	0.180848	26.1476	5.29646	3.61386
L+D IgG	TNFa TSS	33.4572		33.4572	#DIV/0!	24.8842	8.57293	0.963976		L+D IgG	IL1b TSS	31.6625	31.3705	31.5165	0.206511	24.8842	6.63229	1.01235		L+D IgG	IL1b -10kb	32.5719	31.6823	32.1271	0.629039	24.8842	7.24289	0.434404		L+D IgG	IL1a TSS	31.9776	32.2234	32.1005	0.173789	24.8842	7.21627	0.587935		L+D IgG	IL1a -10kb	32.0628	32.1201	32.0915	0.0405041	24.8842	7.20725	0.961091
Control Med1	TNFa TSS	32.4974	32.5558	32.5266	0.0413268	24.7056	7.82095	1.62343		Control Med1	IL1b TSS	30.0638	29.9625	30.0131	0.0716038	24.7056	5.3075	2.53591		Control Med1	IL1b -10kb	29.7805	30.0085	29.8945	0.16121	24.7056	5.18884	1.80395		Control Med1	IL1a TSS	31.5196	30.9455	31.2325	0.405953	24.7056	6.52689	0.948097		Control Med1	IL1a -10kb	30.5918	30.7492	30.6705	0.111287	24.7056	5.96489	2.27381
LPS Med1	TNFa TSS	30.809	30.57	30.6895	0.169037	25.2859	5.40363	8.67205		LPS Med1	IL1b TSS	28.3054		28.3054	#DIV/0!	25.2859	3.01953	12.3846		LPS Med1	IL1b -10kb	29.3743	29.5723	29.4733	0.139981	25.2859	4.18739	3.61153		LPS Med1	IL1a TSS	30.2552	30.1562	30.2057	0.0699827	25.2859	4.91979	2.88827		LPS Med1	IL1a -10kb	29.2415	29.7928	29.5171	0.38977	25.2859	4.23126	7.56186
L+D Med1	TNFa TSS	32.1379	32.1369	32.1374	0.000695929	23.4494	8.68798	0.890088		L+D Med1	IL1b TSS	30.0376	30.013	30.0253	0.0173807	23.4494	6.57588	1.05272		L+D Med1	IL1b -10kb	30.5851	30.6039	30.5945	0.013309	23.4494	7.14511	0.464867		L+D Med1	IL1a TSS	31.38	30.8143	31.0971	0.400058	23.4494	7.64773	0.43596		L+D Med1	IL1a -10kb	30.8707	30.3267	30.5987	0.384677	23.4494	7.1493	1.00048
																																		#DIV/0!	#DIV/0!		#DIV/0!
Control IgG	TNFa TSS	33.6724	33.9114	33.7919	0.169057	25.1779	8.61397	0.997254		Control IgG	IL1b TSS	30.257	29.7072	29.9821	0.388754	25.1779	4.80417	0.997115		Control IgG	IL1b -10kb	31.269	30.7334	31.0012	0.378723	25.1779	5.82324	0.997755		Control IgG	IL1a TSS	30.1691	30.8008	30.485	0.446674	25.1779	5.30704	0.995129		Control IgG	IL1a -10kb	31.6799	32.6442	32.162	0.681819	25.1779	6.9841	0.997164
LPS IgG	TNFa TSS	32.4469	32.0729	32.2599	0.264458	26.3034	5.95653	6.29177		LPS IgG	IL1b TSS	28.891	29.198	29.0445	0.217057	26.3034	2.74109	4.16673		LPS IgG	IL1b -10kb	29.8203	30.0896	29.9549	0.190431	26.3034	3.65153	4.49546		LPS IgG	IL1a TSS	30.275	29.7574	30.0162	0.366017	26.3034	3.7128	3.00465		LPS IgG	IL1a -10kb	31.1319	31.2963	31.2141	0.116286	26.3034	4.91071	4.19681
LPS+Dex IgG	TNFa TSS	32.8961	33.7114	33.3038	0.57655	24.8349	8.46886	1.10277		LPS+Dex IgG	IL1b TSS	28.9867	29.3214	29.1541	0.236663	24.8349	4.31917	1.39554		LPS+Dex IgG	IL1b -10kb	30.3635	30.2291	30.2963	0.0950428	24.8349	5.46139	1.28219		LPS+Dex IgG	IL1a TSS	29.2094	28.0839	28.6466	0.795828	24.8349	3.81173	2.80553		LPS+Dex IgG	IL1a -10kb	31.3872	31.3592	31.3732	0.0197949	24.8349	6.53832	1.35819
Control Med1	TNFa TSS	32.2116	32.0328	32.1222	0.126465	23.9827	8.13951	1.38558		Control Med1	IL1b TSS	28.6633	28.8922	28.7777	0.161871	23.9827	4.79504	1.00344		Control Med1	IL1b -10kb	29.0627	29.612	29.3374	0.388436	23.9827	5.3547	1.3806		Control Med1	IL1a TSS	29.3157	29.4819	29.3988	0.117524	23.9827	5.41614	0.922656		Control Med1	IL1a -10kb	30.2196	30.6881	30.4539	0.331282	23.9827	6.47121	1.42285
LPS Med1	TNFa TSS	30.3131	30.0701	30.1916	0.171845	25.3176	4.87395	13.3249		LPS Med1	IL1b TSS	26.8564	27.4975	27.1769	0.453327	25.3176	1.85931	7.6778		LPS Med1	IL1b -10kb	28.2613	28.2275	28.2444	0.0238989	25.3176	2.92677	7.42933		LPS Med1	IL1a TSS	28.3806	28.2663	28.3234	0.080779	25.3176	3.00583	4.90472		LPS Med1	IL1a -10kb	28.6452	29.0677	28.8565	0.298753	25.3176	3.53885	10.8615
LPS+Dex Med1	TNFa TSS	30.9389	30.7674	30.8531	0.121321	24.4156	6.43751	4.508		LPS+Dex Med1	IL1b TSS	28.2071	27.8357	28.0214	0.262598	24.4156	3.60577	2.28823		LPS+Dex Med1	IL1b -10kb	28.9914	28.4664	28.7289	0.371194	24.4156	4.31329	2.84161		LPS+Dex Med1	IL1a TSS	29.4061	29.8463	29.6262	0.311238	24.4156	5.21059	1.06393		LPS+Dex Med1	IL1a -10kb	29.7268	28.8989	29.3128	0.585408	24.4156	4.89721	4.23626
																																		#DIV/0!	#DIV/0!		#DIV/0!
Control IgG	TNFa TSS	35.1638	35.0103	35.087	0.108538	25.3494	9.7376	0.994748		Control IgG	Il1b TSS	32.0602	30.8918	31.476	0.826185	25.3494	6.12651	0.995495		Control IgG	IL1b-10kb	31.316	31.8361	31.576	0.367788	25.3494	6.22658	0.995452		Control IgG	IL1a TSS	32.0774	31.7156	31.8965	0.255827	25.3494	6.54708	0.995102		Control IgG	IL1a -10kb	33.3453	32.4981	32.9217	0.599071	25.3494	7.57227	0.998429
LPS IgG	TNFa TSS	32.3131	32.3766	32.3449	0.044909	25.2893	7.05555	6.38394		LPS IgG	Il1b TSS	29.0429	29.5217	29.2823	0.338591	25.2893	3.99296	4.36819		LPS IgG	IL1b-10kb	29.9972	30.2581	30.1276	0.18444	25.2893	4.83833	2.60569		LPS IgG	IL1a TSS	30.1959	30.2659	30.2309	0.049504	25.2893	4.94155	3.02817		LPS IgG	IL1a -10kb	30.9868	31.1309	31.0589	0.101885	25.2893	5.76958	3.48322
L+D iGg	TNFa TSS	32.7781	32.2433	32.5107	0.378148	24.678	7.8327	3.72516		L+D iGg	Il1b TSS	30.1679	29.6192	29.8936	0.387999	24.678	5.21559	1.87178		L+D iGg	IL1b-10kb	29.8103	30.3356	30.0729	0.371478	24.678	5.39494	1.77161		L+D iGg	IL1a TSS	31.1476	30.4735	30.8106	0.47666	24.678	6.13257	1.32632		L+D iGg	IL1a -10kb	31.587	30.8121	31.1996	0.547956	24.678	6.52158	2.06827
Control Med1	TNFa TSS	32.3285	32.5822	32.4554	0.179409	23.4346	9.02078	1.63492		Control Med1	Il1b TSS	29.5303	29.2591	29.3947	0.191828	23.4346	5.96011	1.1172		Control Med1	IL1b-10kb	29.3392	29.5357	29.4374	0.138961	23.4346	6.00284	1.16244		Control Med1	IL1a TSS	30.2766	30.3655	30.321	0.0628588	23.4346	6.88645	0.786519		Control Med1	IL1a -10kb	30.9912	30.8544	30.9228	0.096722	23.4346	7.48823	1.05831
LPS Med1	TNFa TSS	30.0862	29.7683	29.9273	0.22484	23.7577	6.16958	11.7976		LPS Med1	Il1b TSS	26.9406	26.9977	26.9691	0.0404367	23.7577	3.21148	7.50849		LPS Med1	IL1b-10kb	27.7111	27.9314	27.8213	0.155784	23.7577	4.0636	4.45801		LPS Med1	IL1a TSS	28.2423	28.2332	28.2378	0.00647645	23.7577	4.48008	4.16962		LPS Med1	IL1a -10kb	28.4313	28.4579	28.4446	0.0187806	23.7577	4.68694	7.37712
L+D Med1	TNFa TSS	31.4077	30.5342	30.971	0.617646	23.8074	7.16362	5.92322		L+D Med1	Il1b TSS	27.8055	27.7675	27.7865	0.0268836	23.8074	3.97913	4.41027		L+D Med1	IL1b-10kb	28.479	28.4774	28.4782	0.00112886	23.8074	4.67084	2.92648		L+D Med1	IL1a TSS	29.661	29.1451	29.4031	0.364761	23.8074	5.5957	1.92425		L+D Med1	IL1a -10kb	29.7858	29.3584	29.5721	0.302217	23.8074	5.76473	3.49495
																																		#DIV/0!	#DIV/0!		#DIV/0!
Med12
Control IgG	TNFa TSS	33.0672	33.095	33.0811	0.0196452	25.8647	7.21639	0.995581		Control IgG	IL1A TSS	31.3854	31.0508	31.2181	0.236597	25.8647	5.3534	0.997645		Control IgG	IL1a -10kb	31.4102	31.1789	31.2945	0.163524	25.8647	5.42984	0.993204		Control IgG	IL1b TSS	29.4389	29.365	29.4019	0.0522405	25.8647	3.53722	0.995005		Control IgG	IL1b -10kb	30.3692	30.9745	30.6718	0.427962	25.8647	4.80714	0.995061
LPS IgG	TNFa TSS	33.3418	33.2283	33.2851	0.0802638	26.0303	7.25476	0.969449		LPS IgG	IL1A TSS	31.6299	31.2424	31.4362	0.273964	26.0303	5.40585	0.962025		LPS IgG	IL1a -10kb	31.2879	31.3351	31.3115	0.0333601	26.0303	5.28119	1.10099		LPS IgG	IL1b TSS	29.8664	29.8365	29.8514	0.0211004	26.0303	3.82113	0.817261		LPS IgG	IL1b -10kb	30.3694	30.2909	30.3301	0.0555664	26.0303	4.29984	1.41437
L+D IgG	TNFa TSS	33.8504	33.2882	33.5693	0.397572	25.2252	8.34416	0.455599		L+D IgG	IL1A TSS	31.6078	31.4762	31.542	0.093067	25.2252	6.31684	0.511626		L+D IgG	IL1a -10kb	31.4153	31.5026	31.4589	0.0617461	25.2252	6.23379	0.568885		L+D IgG	IL1b TSS	30.6929	30.1218	30.4073	0.403825	25.2252	5.18216	0.318163		L+D IgG	IL1b -10kb	31.4975	31.6227	31.5601	0.0885178	25.2252	6.33494	0.345094
Control MED12	TNFa TSS	32.1615	32.0348	32.0982	0.0896238	25.5009	6.59723	1.52919		Control MED12	IL1A TSS	31.096	30.6578	30.8769	0.309873	25.5009	5.37595	0.982171		Control MED12	IL1a -10kb	30.3175	29.9288	30.1231	0.274828	25.5009	4.6222	1.73845		Control MED12	IL1b TSS	29.3508	29.2073	29.2791	0.101445	25.5009	3.77814	0.841984		Control MED12	IL1b -10kb	28.8591	28.9719	28.9155	0.0797715	25.5009	3.41454	2.61255
LPS MED12	TNFa TSS	30.9028	30.8264	30.8646	0.0540221	25.387	5.47765	3.32268		LPS MED12	IL1A TSS	30.4104	31.0516	30.731	0.453391	25.387	5.34404	1.00414		LPS MED12	IL1a -10kb	27.9054	28.1152	28.0103	0.148414	25.387	2.62333	6.94832		LPS MED12	IL1b TSS	27.4841	27.2784	27.3812	0.145476	25.387	1.99427	2.89935		LPS MED12	IL1b -10kb	27.9526	28.1878	28.0702	0.166357	25.387	2.68325	4.33715
L+D MED12	TNFa TSS	31.5565	31.8763	31.7164	0.226104	25.0486	6.6678	1.45619		L+D MED12	IL1A TSS	30.7647	30.6788	30.7218	0.0606942	25.0486	5.67318	0.799306		L+D MED12	IL1a -10kb	29.3788	29.2353	29.3071	0.101434	25.0486	4.25848	2.23693		L+D MED12	IL1b TSS	28.6351	28.5107	28.5729	0.0879891	25.0486	3.5243	1.00396		L+D MED12	IL1b -10kb	29.248	29.2894	29.2687	0.0293207	25.0486	4.22012	1.49472
Control IgG	TNFa TSS	33.8444	33.9794	33.9119	0.0954852	23.3093	10.6026	0.998183		Control IgG	IL1a TSS	31.3882	30.9972	31.1927	0.276495	23.3093	7.88341	0.997637		Control IgG	IL1a -10kb	31.3522	31.8822	31.6172	0.374781	23.3093	8.30792	0.994524		Control IgG	IL1b TSS	30.6798	30.0946	30.3872	0.413809	23.3093	7.07787	0.99456		Control IgG	IL1b -10kb	30.2502	31.0178	30.634	0.542788	23.3093	7.32472	0.996735
LPS IgG	TNFa TSS	33.6204	33.5648	33.5926	0.03932	22.8109	10.7817	0.881665		LPS IgG	IL1a TSS	31.2742	30.9484	31.1113	0.230356	22.8109	8.30037	0.747234		LPS IgG	IL1a -10kb	31.0695	31.5222	31.2958	0.320098	22.8109	8.4849	0.879707		LPS IgG	IL1b TSS	30.6506	29.7036	30.1771	0.669622	22.8109	7.36616	0.81442		LPS IgG	IL1b -10kb	30.9831	30.0993	30.5412	0.624951	22.8109	7.73026	0.752487
L+D IgG	TNFa TSS	33.9243	34.069	33.9966	0.102347	21.8354	12.1613	0.338857		L+D IgG	IL1a TSS	31.3296	30.4875	30.9086	0.595476	21.8354	9.07316	0.437342		L+D IgG	IL1a -10kb	30.9339	31.1003	31.0171	0.117693	21.8354	9.18172	0.542718		L+D IgG	IL1b TSS	29.4861	29.5016	29.4938	0.0109568	21.8354	7.65845	0.665056		L+D IgG	IL1b -10kb	30.8507	30.4418	30.6462	0.289158	21.8354	8.81084	0.355806
Control Med12	TNFa TSS	31.504	31.4602	31.4821	0.0309176	21.9032	9.57887	2.02951		Control Med12	IL1a TSS	29.2831	29.8011	29.5421	0.366299	21.9032	7.63889	1.1819		Control Med12	IL1a -10kb	29.9234	29.8349	29.8792	0.0625567	21.9032	7.97596	1.25183		Control Med12	IL1b TSS	28.3975	28.1732	28.2853	0.158637	21.9032	6.38211	1.61093		Control Med12	IL1b -10kb	28.163	27.9166	28.0398	0.174222	21.9032	6.13657	2.27116
LPS Med12	TNFa TSS	32.4492	32.5349	32.4921	0.0606132	23.0589	9.43317	2.24517		LPS Med12	IL1a TSS	30.4268	31.1197	30.7733	0.489943	23.0589	7.71438	1.12165		LPS Med12	IL1a -10kb	28.6751	28.6868	28.681	0.00821762	23.0589	5.62208	6.39934		LPS Med12	IL1b TSS	28.1799	28.418	28.299	0.168362	23.0589	5.24011	3.55509		LPS Med12	IL1b -10kb	29.1782	28.7977	28.9879	0.269033	23.0589	5.92905	2.62251
L+D Med12	TNFa TSS	31.495	31.3964	31.4457	0.0697655	22.0748	9.37093	2.34415		L+D Med12	IL1a TSS	29.9385	29.9602	29.9494	0.0153293	22.0748	7.87459	1.00375		L+D Med12	IL1a -10kb	28.7913	28.2489	28.5201	0.383553	22.0748	6.44535	3.61665		L+D Med12	IL1b TSS	27.8843	27.9996	27.942	0.0815558	22.0748	5.8672	2.30186		L+D Med12	IL1b -10kb	28.3131	28.1383	28.2257	0.123606	22.0748	6.15096	2.24862
Control IgG	TNFa TSS	33.5504	33.4104	33.4804	0.0989945	21.8412	11.6392	0.986749		Control IgG	IL1a TSS	30.6523	30.3069	30.4796	0.244243	21.8412	8.63844	0.994164		Control IgG	IL1a -10kb	31.3932	32.3167	31.855	0.653013	21.8412	10.0138	0.997373		Control IgG	IL1b TSS	29.6651	30.0633	29.8642	0.281588	21.8412	8.02304	0.997896		Control IgG	IL1b -10kb	30.3129	30.4552	30.384	0.100668	21.8412	8.54285	0.998027
LPS IgG	TNFa TSS	32.8502	32.9102	32.8802	0.0424517	21.8134	11.0668	1.46731		LPS IgG	IL1a TSS	30.6301	30.2711	30.4506	0.253852	21.8134	8.63723	0.995		LPS IgG	IL1a -10kb	31.3078	31.6898	31.4988	0.270138	21.8134	9.68538	1.25234		LPS IgG	IL1b TSS	29.8556	29.8205	29.8381	0.0248174	21.8134	8.02465	0.996781		LPS IgG	IL1b -10kb	30.3663	30.424	30.3952	0.0407914	21.8134	8.58175	0.971473
L+D IgG	TNFa TSS	33.2216	33.6105	33.4161	0.274986	21.417	11.9991	0.768914		L+D IgG	IL1a TSS	31.3916	31.6806	31.5361	0.20434	21.417	10.1192	0.356219		L+D IgG	IL1a -10kb	32.2037	32.3435	32.2736	0.0988435	21.417	10.8566	0.556097		L+D IgG	IL1b TSS	30.6642	30.2386	30.4514	0.300969	21.417	9.03446	0.495015		L+D IgG	IL1b -10kb	31.1373	30.9661	31.0517	0.121098	21.417	9.63472	0.468227
Control Med12	TNFa TSS	32.1263	32.1744	32.1504	0.0340331	21.0398	11.1105	1.42351		Control Med12	IL1a TSS	29.7321	30.1102	29.9211	0.267384	21.0398	8.88131	0.840132		Control Med12	IL1a -10kb	30.7921		30.7921	#DIV/0!	21.0398	9.75229	1.19558		Control Med12	IL1b TSS	28.6502	28.6961	28.6732	0.0324281	21.0398	7.63332	1.30738		Control Med12	IL1b -10kb	28.9887	28.8539	28.9213	0.0953072	21.0398	7.88148	1.57846
LPS Med12	TNFa TSS	32.2289		32.2289	#DIV/0!	21.8357	10.3932	2.34041		LPS Med12	IL1a TSS	30.4347	30.2645	30.3496	0.12028	21.8357	8.51391	1.0838		LPS Med12	IL1a -10kb	29.1925	29.4156	29.304	0.157771	21.8357	7.46834	5.82261		LPS Med12	IL1b TSS	28.4294	28.8057	28.6176	0.266119	21.8357	6.78186	2.35894		LPS Med12	IL1b -10kb	28.7874	28.7356	28.7615	0.0366172	21.8357	6.92582	3.06137
L+D Med12	TNFa TSS	32.4696		32.4696	#DIV/0!	20.3967	12.0729	0.730593		L+D Med12	IL1a TSS	30.4255	30.5395	30.4825	0.0806185	20.3967	10.0858	0.364565		L+D Med12	IL1a -10kb	30.3265	29.7922	30.0593	0.377764	20.3967	9.66262	1.27225		L+D Med12	IL1b TSS	28.7065	28.5381	28.6223	0.119048	20.3967	8.22558	0.86719		L+D Med12	IL1b -10kb	29.1813	29.2253	29.2033	0.0311644	20.3967	8.80659	0.831279
[truncated: 44 more columns]
