# Supplementary material for: Gene-specific mechanisms direct glucocorticoid-receptor-driven repression of inflammatory response genes in macrophages
Source: eLife. 2018 Feb 9;7:e34864. doi: 10.7554/eLife.34864 (PMC5821458; doi:10.7554/eLife.34864)
Supplement: Figure 5—source data 1. [file elife-34864-fig5-data1.xlsx]

## Sheet: Fig5.
FIG 5A
p300 ChIP
						dCT (relative to input)	ddCT(relative to IgG)	Fold change	StD dCT	StD ddCT	STDERR FC	IgG		Over control
TNFa TSS	Control IgG	33.6826	34.0068	33.8447	0.229241	-9.38524			0.162693			0	1	0.297016
TNFa TSS	LPS IgG	32.8566	32.9807	32.9186	0.0877572	-8.51055			0.0750573			0.874689	1.83361	0.544613
TNFa TSS	L+D IgG	32.2246	33.8961	33.0604	1.18192	-8.65192			0.838199			0.733318	1.66246	0.493777
TNFa TSS	Control p300	31.9333	32.2533	32.0933	0.226244	-7.63385	1.75139	3.36682	0.160581	0.228594	0.533471			1
TNFa TSS	LPS p300	29.9294	29.6007	29.765	0.232424	-5.35699	4.02825	16.3163	0.169686	0.185545	2.09845			4.84622
TNFa TSS	L+D p300	30.4243	30.3425	30.3834	0.0578592	-5.97496	3.41028	10.6315	0.0760842	0.841645	6.20227			3.15774
Control	TNFa TSS	24.4456	24.4734	24.4595	0.0196559
LPS	TNFa TSS	24.4503	24.3658	24.4081	0.059715
L+D	TNFa TSS	24.3443	24.4726	24.4084	0.0907189
D	TNFa TSS	24.3826	24.175	24.2788	0.14681
IL1b TSS	Control IgG	31.3664	31.3126	31.3395	0.0380333	-6.50326			0.0291066			0	1	0.199196
IL1b TSS	LPS IgG	31.4873	30.5791	31.0332	0.642176	-6.36791			0.459547			0.135355	1.09836	0.218789
IL1b TSS	L+D IgG	31.2189	30.9833	31.1011	0.166574	-6.17766			0.206473			0.325599	1.25318	0.249629
IL1b TSS	Control p300	28.4119	29.6116	29.0118	0.84831	-4.17552	2.32774	5.02019	0.599949	0.600655	2.09012			1
IL1b TSS	LPS p300	27.4506	27.6932	27.5719	0.171501	-2.90657	3.59669	12.0979	0.140336	0.480497	4.02927			2.40985
IL1b TSS	L+D p300	28.1668	28.082	28.1244	0.0599241	-3.20095	3.30231	9.86491	0.174795	0.270526	1.84982			1.96505
Control	IL1b TSS	24.8251	24.8474	24.8362	0.0157434
LPS	IL1b TSS	24.5947	24.736	24.6653	0.0998793
L+D	IL1b TSS	24.7539	25.093	24.9235	0.239824
D	IL1b TSS	24.631	24.6475	24.6392	0.011673
IL1b -10kb	Control IgG	30.9392	31.0507	30.995	0.0788045	-6.49601			0.0569298			0	1	0.577024
IL1b -10kb	LPS IgG	30.9258	30.3686	30.6472	0.394063	-6.14708			0.279016			0.348929	1.27362	0.734906
IL1b -10kb	L+D IgG	31.4342	31.7053	31.5698	0.191735	-6.93561			0.136709			-0.439606	0.737336	0.425461
IL1b -10kb	Control p300	30.3364	30.067	30.2017	0.19049	-5.70271	0.793297	1.73303	0.135201	0.146698	0.17622			1
IL1b -10kb	LPS p300	28.1566	28.1553	28.1559	0.000954879	-3.65582	2.84019	7.16113	0.0143992	0.279387	1.3868			4.13215
IL1b -10kb	L+D p300	28.4854	28.8256	28.6555	0.240572	-4.02134	2.47467	5.55841	0.171013	0.21894	0.843531			3.20734
Control	IL1b -10kb	24.4873	24.5106	24.499	0.0164878
LPS	IL1b -10kb	24.4857	24.5145	24.5001	0.0203411
L+D	IL1b -10kb	24.6517	24.6166	24.6342	0.0248242
D	IL1b -10kb	24.3826	24.4524	24.4175	0.0493597
IL1a TSS	Control IgG	32.3361	31.9672	32.1516	0.260906	-6.95969			0.190239			0	1	0.541907
IL1a TSS	LPS IgG	31.8841	32.0778	31.9809	0.136971	-7.0197			0.110039			-0.0600119	0.959256	0.519828
IL1a TSS	L+D IgG	32.2317	31.1535	31.6926	0.762401	-6.56579			0.539103			0.393899	1.31394	0.712033
IL1a TSS	Control p300	31.2828	31.2527	31.2678	0.0213229	-6.07581	0.883883	1.84533	0.0488092	0.196401	0.251214			1
IL1a TSS	LPS p300	29.8655	29.6762	29.7709	0.133858	-4.80965	2.15004	4.4384	0.108107	0.154259	0.474571			2.4052
IL1a TSS	L+D p300	30.3245	30.108	30.2163	0.153033	-5.08946	1.87023	3.65592	0.108232	0.54986	1.39339			1.98117
Control	IL1a TSS	25.1455	25.2384	25.192	0.0656506
LPS	IL1a TSS	24.909	25.0135	24.9612	0.0738656
L+D	IL1a TSS	25.129	25.1247	25.1268	0.00303457
D	IL1a TSS	24.9904	25.3054	25.1479	0.222721
Tnf -200bp	Control IgG		35.9746	35.9746	#DIV/0!	-9.66537		0.0012315	#DIV/0!			0.12315	0	1	0.422058
Tnf -200bp	LPS IgG	35.4007	35.3664	35.3835	0.0242065	-9.10003		0.00182229	0.0526341			0.182229	0.565338	1.47973	0.624534
Tnf -200bp	L+D IgG	34.8514	34.7845	34.8179	0.0473205	-8.34144		0.00308301	0.0563559			0.308301	1.32392	2.50346	1.05661
Tnf -200bp	Control p300	35.0358	34.4245	34.7302	0.432266	-8.42088	1.24449	2.36934	0.305659						1
Tnf -200bp	LPS p300	32.0377	32.0221	32.0299	0.0110108	-5.74638	3.91899	15.1263	0.0503785						6.3842
Tnf -200bp	L+D p300	32.5485	32.5445	32.5465	0.00283497	-6.07006	3.5953	12.0863	0.0453915						5.10113
Tnf -200bp	Control input	26.3088	26.3097	26.3093	0.000637935
Tnf -200bp	LPS input	26.3333	26.2337	26.2835	0.07039
Tnf -200bp	L+D input	26.5218	26.4311	26.4765	0.0641306
Ccl2 TSS	Control IgG	36.607	37.3713	36.9891	0.540456	-10.0398		0.000950018	0.390575			0.0950018	0	1	0.161993
Ccl2 TSS	LPS IgG		37.2153	37.2153	#DIV/0!	-10.3183		0.000783221	#DIV/0!			0.0783221	-0.278537	0.824427	0.133551
Ccl2 TSS	L+D IgG	35.4961	35.7853	35.6407	0.204452	-8.64741		0.00249386	0.144694			0.249386	1.39235	2.62506	0.425242
Ccl2 TSS	Control p300	34.1277	34.5986	34.3631	0.333005	-7.41376	2.626	6.1731	0.248894						1
Ccl2 TSS	LPS p300	33.8543	33.5431	33.6987	0.220062	-6.80176	3.23799	9.43481	0.155609						1.52837
Ccl2 TSS	L+D p300	33.881	33.8792	33.8801	0.00128936	-6.8868	3.15296	8.89479	0.00606561						1.44089
Ccl2 TSS	Control input	26.8687	27.03	26.9494	0.114038
Ccl2 TSS	LPS input	26.8978	26.8961	26.897	0.0011882
Ccl2 TSS	L+D input	26.9993	26.9873	26.9933	0.00848062
Ccl2 -12.5kb	Control IgG	33.7865	34.3589	34.0727	0.404739	-9.24649		0.00164637	0.409176			0.164637	0	1	0.210095
Ccl2 -12.5kb	LPS IgG	33.1332		33.1332	#DIV/0!	-8.28269		0.00321115	#DIV/0!			0.321115	0.963799	1.95044	0.409777
Ccl2 -12.5kb	L+D IgG		33.9422	33.9422	#DIV/0!	-8.81386		0.00222211	#DIV/0!			0.222211	0.432635	1.3497	0.283564
Ccl2 -12.5kb	Control p300	31.8873	31.7563	31.8218	0.0926341	-6.99561	2.25089	4.75975	0.299681						1
Ccl2 -12.5kb	LPS p300	30.4859	31.0106	30.7482	0.371018	-5.89772	3.34877	10.1878	0.294245						2.1404
Ccl2 -12.5kb	L+D p300	30.8639	30.8215	30.8427	0.0299883	-5.71442	3.53207	11.568	0.164062						2.43038
Ccl2 -12.5kb	Control input	24.5337	25.1186	24.8262	0.413565
Ccl2 -12.5kb	LPS input	24.7173	24.9837	24.8505	0.188432
Ccl2 -12.5kb	L+D input	24.9656	25.291	25.1283	0.230073
Il1a -20kb	Control IgG	38.7771	39.2762	39.0267	0.35292	-10.8247		0.000551362	0.363302			0.0551362	0	1	0.19758
Il1a -20kb	LPS IgG	38.0683		38.0683	#DIV/0!	-9.95243		0.0010093	#DIV/0!			0.10093	0.872284	1.83056	0.361682
Il1a -20kb	L+D IgG		37.3628	37.3628	#DIV/0!	-8.68036		0.00243754	#DIV/0!			0.243754	2.14436	4.42095	0.873491
Il1a -20kb	Control p300	36.5523	36.8221	36.6872	0.190776	-8.48522	2.33949	5.06124	0.296497						1
Il1a -20kb	LPS p300	34.8139	34.5979	34.7059	0.152732	-6.59003	4.23468	18.8264	0.217826						3.71972
Il1a -20kb	L+D p300	35.6251	35.8278	35.7264	0.143337	-7.04393	3.78078	13.7445	0.118987						2.71563
Il1a -20kb	Control input	27.9379	28.466	28.2019	0.373397
Il1a -20kb	LPS input	28.305	27.9267	28.1158	0.267524
Il1a -20kb	L+D input	28.7448	28.6201	28.6825	0.0881496
				#DIV/0!	#DIV/0!	dCT (relative to input)	ddCT(relative to IgG)	Fold change	StD dCT	StD ddCT	STDERR FC	IgG
TNFa TSS	Control IgG	33.5494	33.6177	33.5835	0.0482888	-6.72197			0.0399375			0	1	0.324336
TNFa TSS	LPS IgG	33.5491	33.2076	33.3783	0.241503	-7.24686			0.187397			-0.524885	0.695014	0.225418
TNFa TSS	L+D IgG		32.0838	32.0838	#DIV/0!	-5.51482			#DIV/0!			1.20715	2.30881	0.748832
TNFa TSS	Dex IgG	33.1665	33.149	33.1577	0.012373	6.88468			0.0227918
TNFa TSS	Control p300	32.1306	31.7876	31.9591	0.242488	-5.09753	1.62444	3.08322	0.172712	0.177269	0.378846			1
TNFa TSS	LPS p300	30.5027	30.6359	30.5693	0.0941419	-4.43782	2.80903	7.00815	0.101918	0.213319	1.03624			2.273
TNFa TSS	L+D p300	30.0999	30.2782	30.1891	0.126043	-3.62004	1.89478	3.71865	0.09198	#DIV/0!	#DIV/0!			1.20609
TNFa TSS	Dex p300	32.2187	31.945	32.0819	0.193546	-5.80881	-12.6935	0.000150966	0.138467	0.14033	1.46844e-05
TNFa TSS	Control input	26.8408	26.8823	26.8616	0.0292951
TNFa TSS	LPS input	26.0543	26.2087	26.1315	0.109141
TNFa TSS	L+D input	26.5463	26.5918	26.569	0.0321543
TNFa TSS	Dex input	26.252	26.2941	26.2731	0.0297631
				#DIV/0!	#DIV/0!
IL1a TSS	Control IgG	31.5045	32.0199	31.7622	0.36442	-6.85454			0.287869			0	1	0.438689
IL1a TSS	LPS IgG	32.0164	31.8791	31.9478	0.097105	-7.15171			0.266303			-0.297176	0.813844	0.357024
IL1a TSS	L+D IgG	30.6239	30.8328	30.7283	0.147746	-5.61321			0.119105			1.24133	2.36416	1.03713
IL1a TSS	Dex IgG	30.5207	31.6611	31.0909	0.806438	-6.82375			0.608463
IL1a TSS	Control p300	30.7555	30.3914	30.5735	0.257502	-5.66581	1.18873	2.27952	0.222759	0.363992	0.575123			1
IL1a TSS	LPS p300	29.8372	29.6401	29.7386	0.139381	-4.94259	2.20912	4.62394	0.275529	0.383188	1.22814			2.02847
IL1a TSS	L+D p300	29.3361	29.3936	29.3648	0.0406673	-4.24971	1.3635	2.57308	0.0640202	0.135221	0.24117			1.12878
IL1a TSS	Dex p300	31.0149	30.748	30.8814	0.188687	-6.61429	0.209466	1.15626	0.250712	0.658091	0.527432
IL1a TSS	Control input	24.7793	25.036	24.9076	0.181482
IL1a TSS	LPS input	24.5387	25.0533	24.796	0.363875
IL1a TSS	L+D input	25.1723	25.0579	25.1151	0.0808909
IL1a TSS	Dex input	24.4794	24.0549	24.2671	0.300184
				#DIV/0!	#DIV/0!
IL1b TSS	Control IgG		30.3482	30.3482	#DIV/0!	-6.2624			#DIV/0!			0	1	0.501533
IL1b TSS	LPS IgG	30.5857	30.7131	30.6494	0.090081	-7.06263			0.0651731			-0.80023	0.574258	0.288009
IL1b TSS	L+D IgG	29.3609	29.994	29.6775	0.447636	-5.59818			0.324949			0.664211	1.5847	0.79478
IL1b TSS	Dex IgG	30.0038	29.8058	29.9048	0.139996	-6.09422			#DIV/0!
IL1b TSS	Control p300	29.3086	29.3966	29.3526	0.0621885	-5.26681	0.995584	1.99389	0.0529179	#DIV/0!	#DIV/0!			1
IL1b TSS	LPS p300	28.0507	27.9422	27.9964	0.0767329	-4.40963	2.653	6.28973	0.0559841	0.0859171	0.374574			3.15451
IL1b TSS	L+D p300	28.101	27.8252	27.9631	0.195018	-3.88382	1.71437	3.28153	0.156266	0.36057	0.820147			1.64579
IL1b TSS	Dex p300	29.4961	29.7751	29.6356	0.197315	-5.82504	0.269179	1.20512	#DIV/0!	#DIV/0!	#DIV/0!
IL1b TSS	Control input	24.1152	24.0564	24.0858	0.0416316
IL1b TSS	LPS input	23.6006	23.573	23.5868	0.0195062
IL1b TSS	L+D input	24.1528	24.0058	24.0793	0.103952
IL1b TSS	Dex input	23.8106		23.8106	#DIV/0!
IL1a -10kb	Control IgG	32.3033	32.4485	32.3759	0.102709	-7.22016			0.137069			0	1	0.556033
IL1a -10kb	LPS IgG	32.0532	32.6945	32.3739	0.453454	-7.96231			0.320831			-0.742151	0.597847	0.332423
IL1a -10kb	L+D IgG	31.2541	31.0488	31.1515	0.145139	-6.1265			0.142211			1.09367	2.13416	1.18666
IL1a -10kb	Dex IgG	31.401	32.2547	31.8278	0.603683	-7.89007			0.428539
IL1a -10kb	Control p300	31.4519	31.6063	31.5291	0.109174	-6.37341	0.846758	1.79845	0.139545	0.195604	0.243839			1
IL1a -10kb	LPS p300	30.3356	30.0785	30.2071	0.181772	-5.7955	2.16681	4.4903	0.129007	0.345797	1.07627			2.49676
IL1a -10kb	L+D p300	30.0216	29.7464	29.884	0.194542	-4.85905	1.26745	2.40736	0.169158	0.220994	0.368763			1.33857
IL1a -10kb	Dex p300	30.4449	30.2393	30.3421	0.145352	-6.40435	1.48573	2.80058	0.109509	0.442309	0.858618
IL1a -10kb	Control input	25.272	25.0395	25.1557	0.164398
IL1a -10kb	LPS input	24.4226	24.4005	24.4116	0.0156368
IL1a -10kb	L+D input	25.1234	24.9265	25.025	0.139221
IL1a -10kb	Dex input	23.9756	23.9	23.9378	0.053453
				#DIV/0!	#DIV/0!
IL1b -10kb	Control IgG	31.8206	31.4702	31.6454	0.247764	-7.39691			0.223385			0	1	0.221641
IL1b -10kb	LPS IgG	31.6716	31.6379	31.6548	0.0238072	-7.58987			0.171689			-0.192955	0.874812	0.193894
IL1b -10kb	L+D IgG	29.5275	29.544	29.5358	0.0117094	-4.99525			0.0494584			2.40166	5.28412	1.17118
IL1b -10kb	Dex IgG	30.2771	29.9702	30.1237	0.216972	-6.80284			0.162484
IL1b -10kb	Control p300	29.6414	29.302	29.4717	0.239962	-5.22321	2.1737	4.51179	0.219084	0.312888	0.978505			1
IL1b -10kb	LPS p300	28.2078	28.2119	28.2098	0.00286059	-4.14494	3.44493	10.89	0.170874	0.24223	1.82843			2.41366
IL1b -10kb	L+D p300	27.9003	27.8827	27.8915	0.0124606	-3.35096	1.64429	3.12594	0.0495501	0.0700096	0.151692			0.692837
IL1b -10kb	Dex p300	28.5044	28.704	28.6042	0.141125	-5.28334	1.5195	2.86692	0.11323	0.198046	0.393556
IL1b -10kb	Control input	24.1099	24.3871	24.2485	0.195996
IL1b -10kb	LPS input	23.894	24.2358	24.0649	0.241636
IL1b -10kb	L+D input	24.5893	24.4917	24.5405	0.0689576
IL1b -10kb	Dex input	23.3743	23.2673	23.3208	0.0756674
Tnf TSS	Control IgG	35.5462	35.3182	35.4322	0.161191	-6.69834			0.136639		0	1	0.792704
Tnf TSS	LPS IgG	36.4427	36.5366	36.4897	0.0664019	-7.87213			0.0989798		-1.17379	0.443255	0.35137
Tnf TSS	L+D IgG	35.8505	36.1778	36.0142	0.231377	-7.31795			0.182101		-0.619615	0.650845	0.515927
Tnf TSS	Control p300	35.2426	34.9515	35.097	0.205814	-6.36319	0.335146	1.26151	0.163886				1
Tnf TSS	LPS p300	34.0806	33.9874	34.034	0.0658354	-5.41644	1.2819	2.43159	0.0987904				1.92753
Tnf TSS	L+D p300	35.3728	35.136	35.2544	0.167452	-6.55817	0.140164	1.10203	0.142875				0.873584
Tnf TSS	Control input	28.8092	28.6585	28.7338	0.106574
Tnf TSS	LPS input	28.5304	28.7047	28.6176	0.123227
Tnf TSS	L+D input	28.6162	28.7762	28.6962	0.113076
				#DIV/0!	#DIV/0!
Il1b TSS	Control IgG	33.7909		33.7909	#DIV/0!	-7.93768			#DIV/0!		0	1	0.445307
Il1b TSS	LPS IgG	33.5369	33.6653	33.6011	0.0908457	-7.67173			0.0762018		0.26595	1.20243	0.53545
Il1b TSS	L+D IgG	33.2242	32.8549	33.0396	0.261149	-6.9832			0.18865		0.954489	1.93789	0.862957
Il1b TSS	Control p300	32.5909	32.6567	32.6238	0.0465274	-6.77056	1.16713	2.24564	0.0408357				1
Il1b TSS	LPS p300	31.2864	31.0027	31.1445	0.2006	-5.21514	2.72254	6.60035	0.14765				2.93918
Il1b TSS	L+D p300	32.0785	31.8053	31.9419	0.193213	-5.88552	2.05216	4.14727	0.141969				1.84681
Il1b TSS	Control input	25.8291	25.8774	25.8532	0.0342098
Il1b TSS	LPS input	25.9704	25.8884	25.9294	0.0579698
Il1b TSS	L+D input	26.095	26.0178	26.0564	0.0545778
				#DIV/0!	#DIV/0!
Ccl2 TSS	Control IgG	32.6944	33.1111	32.9027	0.294631	-7.4656			0.215022		0	1	0.421412
Ccl2 TSS	LPS IgG	33.4985		33.4985	#DIV/0!	-8.03345			#DIV/0!		-0.567855	0.674619	0.284292
Ccl2 TSS	L+D IgG	33.8435	33.8766	33.8601	0.023408	-8.18034			0.112692		-0.71474	0.609315	0.256772
Ccl2 TSS	Control p300	31.3372	31.9749	31.656	0.45094	-6.2189	1.2467	2.37298	0.323271				1
Ccl2 TSS	LPS p300	31.6522	31.8471	31.7496	0.137825	-6.28458	1.18102	2.26736	0.113417				0.955493
Ccl2 TSS	L+D p300	32.0082	32.8138	32.411	0.569631	-6.7313	0.7343	1.66359	0.41793				0.701056
Ccl2 TSS	Control input	25.4903	25.3839	25.4371	0.0752439
Ccl2 TSS	LPS input	25.407	25.5231	25.465	0.0820427
Ccl2 TSS	L+D input	25.5683	25.7912	25.6797	0.157643
Ccl2 -12.5kb	Control IgG	32.1907	32.2455	32.2181	0.0387077	-7.39033			0.0496081		0	1	0.30973
Ccl2 -12.5kb	LPS IgG		32.5034	32.5034	#DIV/0!	-7.72495			#DIV/0!		-0.334622	0.792992	0.245613
Ccl2 -12.5kb	L+D IgG		32.1176	32.1176	#DIV/0!	-7.19553			#DIV/0!		0.1948	1.14457	0.354506
Ccl2 -12.5kb	Control p300	30.6223	30.4321	30.5272	0.134429	-5.69941	1.69092	3.22862	0.10367				1
Ccl2 -12.5kb	LPS p300	30.2347	30.2107	30.2227	0.0169612	-5.44422	1.94611	3.85333	0.0344065				1.19349
Ccl2 -12.5kb	L+D p300	31.1376	30.999	31.0683	0.0979749	-6.14625	1.24408	2.36868	0.078566				0.733652
Ccl2 -12.5kb	Control input	24.8692	24.7864	24.8278	0.058512
Ccl2 -12.5kb	LPS input	24.7462	24.8107	24.7785	0.0456063
Ccl2 -12.5kb	L+D input	24.9591	24.885	24.9221	0.0524037
				#DIV/0!	#DIV/0!
Il1a -20kb	Control IgG	36.7137	37.34	37.0269	0.442856	-8.59918			0.315035		0	1	0.268783
Il1a -20kb	LPS IgG	37.5005	37.0328	37.2666	0.330715	-8.7216			0.242146		-0.122421	0.918645	0.246916
Il1a -20kb	L+D IgG		37.8143	37.8143	#DIV/0!	-9.40371			#DIV/0!		-0.804532	0.572548	0.153891
Il1a -20kb	Control p300	35.1146	35.1482	35.1314	0.0237182	-6.70369	1.89548	3.72047	0.0383083				1
Il1a -20kb	LPS p300	34.1048		34.1048	#DIV/0!	-5.55979	3.03939	8.22143	#DIV/0!				2.20978
Il1a -20kb	L+D p300	35.3551	34.9377	35.1464	0.295139	-6.73583	1.86335	3.6385	0.216281				0.977969
Il1a -20kb	Control input	28.4622	28.3933	28.4277	0.0487083
Il1a -20kb	LPS input	28.4822	28.6079	28.545	0.0888671
Il1a -20kb	L+D input	28.4673	28.3538	28.4105	0.0803015
Il1a -10kb	Control IgG	32.1313	31.9366	32.0339	0.137655	-7.32448			0.151715		0	1	0.610842
Il1a -10kb	LPS IgG	33.1513	33.7105	33.4309	0.395441	-8.62755			0.308289		-1.30307	0.405263	0.247552
Il1a -10kb	L+D IgG		33.4526	33.4526	#DIV/0!	-8.37604			#DIV/0!		-1.05156	0.482448	0.294699
Il1a -10kb	Control p300	31.2777	31.368	31.3228	0.0638757	-6.61335	0.711128	1.63708	0.124833				1
Il1a -10kb	LPS p300	29.6889	30.0874	29.8882	0.281751	-5.0848	2.23968	4.72291	0.237797				2.88496
Il1a -10kb	L+D p300	30.5531	31.0128	30.783	0.325081	-5.70641	1.61807	3.06964	0.269367				1.87507
Il1a -10kb	Control input	24.5931	24.8258	24.7095	0.164579
Il1a -10kb	LPS input	24.6735	24.9332	24.8034	0.183605
Il1a -10kb	L+D input	24.9361	25.217	25.0765	0.198595
				#DIV/0!	#DIV/0!
Tnf -200bp	Control IgG	33.9029	33.479	33.6909	0.299727	-7.69681			0.246284		0	1	0.462506
Tnf -200bp	LPS IgG	34.5938	34.2741	34.4339	0.226072	-8.53592			0.159956		-0.839107	0.55899	0.258536
Tnf -200bp	L+D IgG	34.4762		34.4762	#DIV/0!	-8.38883			#DIV/0!		-0.692016	0.618988	0.286286
Tnf -200bp	Control p300	32.6438	32.5131	32.5785	0.0923832	-6.58435	1.11246	2.16214	0.141439				1
Tnf -200bp	LPS p300	31.0301	31.029	31.0296	0.000741785	-5.13157	2.56524	5.91853	0.00566532				2.73736
Tnf -200bp	L+D p300	32.0487	32.1544	32.1016	0.0747746	-6.01416	1.68265	3.21018	0.053472				1.48473
Tnf -200bp	Control input	26.1196	25.8687	25.9941	0.177413
Tnf -200bp	LPS input	25.8924	25.9036	25.898	0.00797756
Tnf -200bp	L+D input	26.0794	26.0954	26.0874	0.0112819
Contro IgG	Tnf TSS	39.017	38.8168	38.9169	0.141506	-9.19294			0.100186			0	1	0.0683279
LPS IgG	Tnf TSS	37.5317	37.949	37.7403	0.295087	-8.15728			0.214847			1.03567	2.05006	0.140076
L+D IgG	Tnf TSS	38.8588	39.0743	38.9666	0.152346	-8.97013			0.109729			0.222809	1.167	0.0797389
Control p300	Tnf TSS	35.1914	34.8996	35.0455	0.206364	-5.32156	3.87138	14.6353	0.146008					1
LPS p300	Tnf TSS	33.7921	33.6359	33.714	0.11051	-4.13093	5.06201	33.4055	0.0934197					2.28253
L+D p300	Tnf TSS	35.6437	35.3669	35.5053	0.195699	-5.50888	3.68407	12.8533	0.139946					0.878239
Control Input	Tnf TSS	29.729	29.7189	29.724	0.00711574
LPS Input	Tnf TSS	29.6343	29.5319	29.5831	0.0724022
LPS+Dex Input	Tnf TSS	29.9755	30.0173	29.9964	0.029523
				#DIV/0!	#DIV/0!
Contro IgG	IL1b TSS	34.6593	35.2955	34.9774	0.44988	-8.03368			0.320014			0	1	0.204121
LPS IgG	IL1b TSS	35.3349	35.3046	35.3198	0.0214308	-8.3531			0.024248			-0.319425	0.801389	0.16358
L+D IgG	IL1b TSS	35.9911		35.9911	#DIV/0!	-8.8443			#DIV/0!			-0.81062	0.570137	0.116377
Control p300	IL1b TSS	32.5142	32.8557	32.6849	0.241487	-5.74117	2.29251	4.89906	0.174272					1
LPS p300	IL1b TSS	30.9594	31.0292	30.9943	0.0493786	-4.02768	4.006	16.0667	0.0397171					3.27954
L+D p300	IL1b TSS	32.7881	32.6835	32.7358	0.0739033	-5.58896	2.44472	5.44422	0.140282					1.11128
Control Input	IL1b TSS	26.9786	26.9089	26.9438	0.0492464
LPS Input	IL1b TSS	26.9856	26.9477	26.9666	0.0267703
LPS+Dex Input	IL1b TSS	27.0167	27.277	27.1468	0.18411
				#DIV/0!	#DIV/0!
Contro IgG	Tnf -200bp	34.8249	34.854	34.8394	0.0206	-8.07131			0.0539475			0	1	0.141194
LPS IgG	Tnf -200bp	34.623	34.5432	34.5831	0.056435	-7.69109			0.0408473			0.380216	1.30154	0.183769
L+D IgG	Tnf -200bp	36.1368	35.8599	35.9984	0.195837	-9.0362			0.139104			-0.964893	0.512316	0.072336
Control p300	Tnf -200bp	32.2348	31.7955	32.0152	0.310619	-5.24706	2.82425	7.08245	0.225699					1
LPS p300	Tnf -200bp	29.8257	29.8734	29.8496	0.0337606	-2.95755	5.11376	34.6254	0.0254153					4.8889
L+D p300	Tnf -200bp	31.3442	31.5564	31.4503	0.150063	-4.48816	3.58315	11.9849	0.106927					1.6922
Control Input	Tnf -200bp	26.7162	26.8201	26.7681	0.0734596
LPS Input	Tnf -200bp	26.9007	26.8833	26.892	0.0123325
LPS+Dex Input	Tnf -200bp	26.9753	26.949	26.9622	0.0186539
				#DIV/0!	#DIV/0!
Contro IgG	IL1a -10kb	34.3935	34.0413	34.2174	0.249078	-8.61214			0.180656			0	1	0.0842476
LPS IgG	IL1a -10kb	33.2271	33.2867	33.2569	0.0421361	-7.66811			0.125102			0.944026	1.92389	0.162083
L+D IgG	IL1a -10kb	34.2076	33.8826	34.0451	0.229837	-8.3449			0.181201			0.267231	1.2035	0.101392
Control p300	IL1a -10kb	30.5241	30.7723	30.6482	0.175526	-5.04292	3.56922	11.8698	0.130466					1
LPS p300	IL1a -10kb	28.5283	28.7412	28.6348	0.150518	-3.04593	5.5662	47.3798	0.161525					3.99164
L+D p300	IL1a -10kb	30.091	29.9438	30.0174	0.104103	-4.31725	4.29489	19.6286	0.108812					1.65366
Control Input	IL1a -10kb	25.6455	25.5651	25.6053	0.0568625
LPS Input	IL1a -10kb	25.7103	25.4673	25.5888	0.17183
LPS+Dex Input	IL1a -10kb	25.7803	25.6201	25.7002	0.113324
Ccl2 TSS	Control IgG	33.9525	33.2956	33.6241	0.464524	-9.49011			0.392465		0	1	0.0408284
Ccl2 TSS	LPS IgG	33.8816	34.252	34.0668	0.261952	-10.1378			#DIV/0!		-0.647673	0.638309	0.0260612
Ccl2 TSS	L+D IgG	33.5303		33.5303	#DIV/0!	-9.35684			#DIV/0!		0.133269	1.09678	0.0447797
Ccl2 TSS	Control p300	28.9692	29.0504	29.0098	0.0574371	-4.87583	4.61428	24.4927	0.218602				1
Ccl2 TSS	LPS p300	29.6578	29.6095	29.6336	0.0341046	-5.70462	3.78549	13.7894	#DIV/0!				0.563002
Ccl2 TSS	L+D p300	31.7086	31.6583	31.6834	0.0355504	-7.51003	1.98008	3.94515	0.250931				0.161074
Ccl2 TSS	Control input	23.9192	24.3488	24.134	0.303768
Ccl2 TSS	LPS input	23.929		23.929	#DIV/0!
Ccl2 TSS	L+D input	23.9237	24.4231	24.1734	0.353085
Il1a -20kb	Control IgG	35.3852		35.3852	#DIV/0!	-10.6467			#DIV/0!		0	1	0.0336458
Il1a -20kb	LPS IgG	34.7397	34.5573	34.6485	0.128998	-9.94087			#DIV/0!		0.705853	1.63111	0.0548799
Il1a -20kb	L+D IgG	35.4169		35.4169	#DIV/0!	-10.1163			#DIV/0!		0.530431	1.44436	0.0485966
Il1a -20kb	Control p300	30.4136	30.57	30.4918	0.11062	-5.7533	4.89343	29.7214	0.122574				1
Il1a -20kb	LPS p300	29.8129	29.8563	29.8346	0.0306977	-5.12696	5.51976	45.879	#DIV/0!				1.54364
Il1a -20kb	L+D p300	31.3349		31.3349	#DIV/0!	-6.03433	4.6124	24.4608	#DIV/0!				0.823002
Il1a -20kb	Control input	24.8329	24.6441	24.7385	0.133462
Il1a -20kb	LPS input		24.7076	24.7076	#DIV/0!
Il1a -20kb	L+D input	25.289	25.3122	25.3006	0.0164447
Ccl2 -12.5kb	Control IgG	Undetermined	30.7158	30.7158	#DIV/0!	-8.56924			#DIV/0!		0	1	0.0551772
Ccl2 -12.5kb	LPS IgG		30.3826	30.3826	#DIV/0!	-8.70554			#DIV/0!		-0.136301	0.909849	0.0502029
Ccl2 -12.5kb	L+D IgG	31.1757	31.2308	31.2033	0.0389572	-9.72165			0.0857423		-1.15241	0.449874	0.0248228
Ccl2 -12.5kb	Control p300	26.5341	26.5378	26.536	0.00262592	-4.38946	4.17978	18.1234	0.266018				1
Ccl2 -12.5kb	LPS p300	25.9391	25.8127	25.8759	0.0893689	-4.19879	4.37045	20.6842	0.0632002				1.14129
Ccl2 -12.5kb	L+D p300	28.395		28.395	#DIV/0!	-6.91337	1.65588	3.15115	#DIV/0!				0.173871
Ccl2 -12.5kb	Control input	22.4125	21.8805	22.1465	0.376197
Ccl2 -12.5kb	LPS input	21.678	21.6762	21.6771	0.00131498
Ccl2 -12.5kb	L+D input	21.4004	21.5628	21.4816	0.11483
IL1b TSS	Control IgG	33.0897	33.7687	33.4292	0.480096	-7.39228			0.349547		0	1	0.79046
IL1b TSS	LPS IgG	33.3143	33.0132	33.1638	0.212844	-7.5169			0.264633		-0.124621	0.917245	0.725045
IL1b TSS	L+D IgG	33.6168	33.5242	33.5705	0.0655468	-7.83001			0.209532		-0.437734	0.738293	0.583592
IL1b TSS	Control p300	33.2854	32.8946	33.09	0.276332	-7.05304	0.339235	1.26509	0.212407				1
IL1b TSS	LPS p300	31.5156	31.44	31.4778	0.0534584	-5.83099	1.56128	2.95116	0.220926				2.33277
IL1b TSS	L+D p300	32.8849	33.4048	33.1449	0.367612	-7.40438	-0.0121088	0.991642	0.330643				0.783853
IL1b TSS	Control input	26.1202	25.9537	26.037	0.117789
IL1b TSS	LPS input	25.8645	25.4292	25.6469	0.30783
IL1b TSS	L+D input	25.5361	25.9448	25.7405	0.288983
Il1b -10kb	Control IgG	31.8738	32.0073	31.9405	0.0943739	-7.18856			0.189788		0	1	0.810608
Il1b -10kb	LPS IgG	32.2328	32.5009	32.3668	0.189576	-7.75941			0.252006		-0.570848	0.673221	0.545718
Il1b -10kb	L+D IgG	32.2086	32.7863	32.4975	0.408478	-7.82972			0.363144		-0.64116	0.641197	0.519759
Il1b -10kb	Control p300	31.4337	31.8415	31.6376	0.288396	-6.88563	0.302924	1.23364	0.270468				1
Il1b -10kb	LPS p300	30.1677	30.5837	30.3757	0.294155	-5.76828	1.42027	2.67636	0.297995				2.16948
Il1b -10kb	L+D p300	31.1346	31.874	31.5043	0.522854	-6.83654	0.35202	1.27635	0.430273				1.03462
Il1b -10kb	Control input	24.5743	24.9297	24.752	0.251263
Il1b -10kb	LPS input	24.394	24.8208	24.6074	0.301786
Il1b -10kb	L+D input	24.8879	24.4476	24.6678	0.311276
Il1a TSS	Control IgG	33.079	33.0094	33.0442	0.0492248	-7.41124			0.0505818		0	1	1.27088
Il1a TSS	LPS IgG	32.1031	32.6167	32.3599	0.363159	-7.13541			0.263203		0.275835	1.21069	1.53865
Il1a TSS	L+D IgG	33.4425	32.9678	33.2052	0.335651	-7.8353			0.302059		-0.424057	0.745326	0.947219
Il1a TSS	Control p300	33.5362	33.2439	33.39	0.206702	-7.75707	-0.345827	0.786857	0.150698				1
Il1a TSS	LPS p300	31.6882	31.9576	31.8229	0.190517	-6.59834	0.812899	1.75674	0.146567				2.2326
Il1a TSS	L+D p300	32.9455	33.1155	33.0305	0.12021	-7.66063	-0.249386	0.841254	0.205267				1.06913
Il1a TSS	Control input	25.5963	25.6697	25.633	0.0519033
Il1a TSS	LPS input	25.1668	25.2823	25.2245	0.0816529
Il1a TSS	L+D input	25.183	25.5567	25.3699	0.264232
Il1a -10kb	Control IgG	32.2254	32.1631	32.1942	0.0440944	-7.54771			0.0358758		0	1	0.767801
Il1a -10kb	LPS IgG	32.7993		32.7993	#DIV/0!	-8.76057			#DIV/0!		-1.21286	0.431413	0.331239
Il1a -10kb	L+D IgG	32.2547	32.6875	32.4711	0.306071	-8.10339			0.261123		-0.555686	0.680333	0.522361
Il1a -10kb	Control p300	31.4688	32.1573	31.813	0.486797	-7.16651	0.381195	1.30242	0.344674				1
Il1a -10kb	LPS p300	30.1214	29.7387	29.9301	0.270594	-5.89132	1.65638	3.15225	0.204386				2.4203
Il1a -10kb	L+D p300	31.3234	31.3717	31.3475	0.0341733	-6.97983	0.567878	1.48234	0.148085				1.13814
Il1a -10kb	Control input	24.6288	24.6643	24.6465	0.0250966
Il1a -10kb	LPS input	23.9669	24.1106	24.0387	0.101619
Il1a -10kb	L+D input	24.5138	24.2216	24.3677	0.206617
FIG 5C- C646 inhibitor experiment
Post-treat-control	IL1b	29.5835	29.6313	29.6074	0.0338011	21.1643	8.44318	0.997796
LPS 30min	IL1b	21.0665	20.9611	21.0138	0.0745359	21.2126	-0.198754	398.588
5uM inhibitor 30min	IL1b	28.088	28.0177	28.0529	0.0497144	20.9284	7.12449	2.48891
LPS+ 5uM inhibitor 30min	IL1b	21.2618	21.1496	21.2057	0.0793858	20.9174	0.288323	284.38
10uM inhibitor 30min	IL1b	28.5805	28.987	28.7837	0.287405	21.351	7.43274	2.01009
LPS+10um inhibitor 30min	IL1b	21.8996	21.8635	21.8815	0.0255376	21.0505	0.830982	195.228
Post-treat-control	Tnf	33.0873	33.0287	33.058	0.0414078	21.1643	11.8938	1.00434
LPS 30min	Tnf	27.283	27.3716	27.3273	0.0627159	21.2126	6.11474	55.1491
5uM inhibitor 30min	Tnf	31.6204	31.7388	31.6796	0.0836666	20.9284	10.7512	2.21729
LPS+ 5uM inhibitor 30min	Tnf	26.85	26.8633	26.8567	0.0094382	20.9174	5.9393	62.2803
10uM inhibitor 30min	Tnf	31.8725	32.0878	31.9801	0.152244	21.351	10.6291	2.41311
LPS+10um inhibitor 30min	Tnf	27.0214	27.0136	27.0175	0.00554046	21.0505	5.96695	61.0977
Post-treat-control	Il1a	32.7067	32.495	32.6009	0.14966	21.1643	11.4366	0.995429
LPS 30min	Il1a	22.3903	22.4883	22.4393	0.0692908	21.2126	1.22672	1178.94
5uM inhibitor 30min	Il1a	31.9809	32.3459	32.1634	0.258115	20.9284	11.235	1.1447
LPS+ 5uM inhibitor 30min	Il1a	22.6517	22.9098	22.7808	0.182533	20.9174	1.86338	758.295
10uM inhibitor 30min	Il1a	32.2747	32.4713	32.373	0.139021	21.351	11.022	1.32683
LPS+10um inhibitor 30min	Il1a	23.1002	23.5817	23.341	0.340468	21.0505	2.29042	564.012
Post-treat-control	Ccl2.	28.4789	28.2326	28.3558	0.174222	21.1643	7.19149	0.998965
LPS 30min	Ccl2.	23.4314	23.455	23.4432	0.0167401	21.2126	2.23063	31.1115
5uM inhibitor 30min	Ccl2.	27.8482	28.0169	27.9326	0.119318	20.9284	7.00418	1.13747
LPS+ 5uM inhibitor 30min	Ccl2.	23.9811	23.6929	23.837	0.203736	20.9174	2.91963	19.2978
10uM inhibitor 30min	Ccl2.	28.1857	28.4727	28.3292	0.202944	21.351	6.97824	1.1581
LPS+10um inhibitor 30min	Ccl2.	24.1767	23.9006	24.0386	0.195209	21.0505	2.98809	18.4036
Control-Post-treat	IL1b	30.876	30.8473	30.8617	0.0203478	21.4652	9.39643	0.995552
LPS 30min	IL1b	22.167	22.1302	22.1486	0.0260232	21.6521	0.496559	475.546
5uM inhibitor	IL1b	30.2523	30.9326	30.5924	0.481022	21.4874	9.10502	1.2184
LPS+ 5uM inhibitor	IL1b	22.705	22.9886	22.8468	0.200514	21.5813	1.26549	279.076
10uM inhibitor	IL1b	32.5963	32.2891	32.4427	0.217267	23.3093	9.13339	1.19467
LPS+ 10uM inhibitor	IL1b	22.9952	23.2373	23.1163	0.17115	21.1971	1.9191	177.404
Control-Post-treat	Tnf	32.5338	32.1815	32.3576	0.249148	21.4652	10.8924	0.998325
LPS 30min	Tnf	27.7067	27.5335	27.6201	0.122483	21.6521	5.96799	30.3161
5uM inhibitor	Tnf	32.9642	32.9137	32.939	0.0356785	21.4874	11.4515	0.677576
LPS+ 5uM inhibitor	Tnf	27.2415	27.3238	27.2827	0.0582355	21.5813	5.70132	36.4711
10uM inhibitor	Tnf	35.6243	35.594	35.6092	0.0214254	23.3093	12.2999	0.376347
LPS+ 10uM inhibitor	Tnf	27.1736	27.0653	27.1195	0.0765454	21.1971	5.92232	31.2912
Control-Post-treat	IL1a	33.8676	34.2138	34.0407	0.244789	21.4652	12.5755	0.996197
LPS 30min	IL1a	25.9107	25.9135	25.9121	0.00198124	21.6521	4.26006	317.352
5uM inhibitor	IL1a	34.8894	34.8274	34.8584	0.0438624	21.4874	13.371	0.573967
LPS+ 5uM inhibitor	IL1a	27.2283	27.3906	27.3094	0.114768	21.5813	5.72811	114.713
10uM inhibitor	IL1a	36.8621	36.6263	36.7442	0.166705	23.3093	13.4349	0.549081
LPS+ 10uM inhibitor	IL1a	27.2602	27.6291	27.4446	0.260883	21.1971	6.2475	80.0317
Control-Post-treat	Ccl2.	29.0891	28.8267	28.9579	0.185592	21.4652	7.49266	0.998155
LPS 30min	Ccl2.	24.2191	24.4662	24.3427	0.174686	21.6521	2.69059	27.8463
5uM inhibitor	Ccl2.	28.7311	28.3236	28.5274	0.288136	21.4874	7.03996	1.36607
LPS+ 5uM inhibitor	Ccl2.	24.5951	24.6288	24.612	0.0238437	21.5813	3.03064	21.9989
10uM inhibitor	Ccl2.	30.2651	30.2201	30.2426	0.031778	23.3093	6.93329	1.47091
LPS+ 10uM inhibitor	Ccl2.	24.8573	24.7994	24.8284	0.040933	21.1971	3.63122	14.5081
Control POST-TREAT	Il1b	32.129	32.6596	32.3943	0.375187	22.1663	10.2279	0.994514
LPS 30min	Il1b	22.1607	22.9187	22.5397	0.535985	21.8054	0.734216	716.978
5uM inhibitor	Il1b	31.7765	32.8936	32.335	0.789862	22.224	10.111	1.07847
LPS + 5uM inhibitor	Il1b	23.5963	24.1532	23.8748	0.393805	22.6683	1.20648	516.822
10uM inhibitor	Il1b	31.8116	32.7322	32.2719	0.650952	22.9577	9.31417	1.87362
LPS+ 10uM inhibitor	Il1b	23.179	23.7024	23.4407	0.370082	22.1326	1.30803	481.694
Control POST-TREAT	Tnf	33.6593	33.4478	33.5536	0.149549	22.1663	11.3872	0.995003
LPS 30min	Tnf	27.4612	27.4419	27.4515	0.0137001	21.8054	5.64609	53.2204
5uM inhibitor	Tnf	33.0869	33.2286	33.1578	0.100171	22.224	10.9337	1.3625
LPS + 5uM inhibitor	Tnf	28.5375	28.6765	28.607	0.0982662	22.6683	5.93868	43.451
10uM inhibitor	Tnf	34.3092	34.4631	34.3862	0.10884	22.9577	11.4284	0.966992
LPS+ 10uM inhibitor	Tnf	27.6394	27.6714	27.6554	0.022642	22.1326	5.52279	57.9691
Control POST-TREAT	Il1a	34.8331	34.9186	34.8758	0.0604703	22.1663	12.7095	0.993439
LPS 30min	Il1a	26.0991	26.211	26.1551	0.0791093	21.8054	4.34964	326.37
5uM inhibitor	Il1a	34.9453	34.9486	34.947	0.00236832	22.224	12.723	0.984216
LPS + 5uM inhibitor	Il1a	27.8514	28.2772	28.0643	0.301034	22.6683	5.39601	158.022
10uM inhibitor	Il1a	34.9313	35.5566	35.2439	0.44216	22.9577	12.2862	1.33222
LPS+ 10uM inhibitor	Il1a	27.4855	27.7442	27.6148	0.182947	22.1326	5.48219	148.86
Control POST-TREAT	Ccl2.	26.875	26.8613	26.8681	0.00964859	20.9196	5.94857	0.994075
LPS 30min	Ccl2.	22.7385	22.8288	22.7837	0.0638623	20.772	2.01165	15.2248
5uM inhibitor	Ccl2.	27.3171	27.3633	27.3402	0.0326196	21.2052	6.13499	0.873579
LPS + 5uM inhibitor	Ccl2.	24.0927	24.0178	24.0552	0.0529985	22.5882	1.46707	22.2068
10uM inhibitor	Ccl2.	28.9148	28.9143	28.9145	0.000347964	22.7118	6.20268	0.833536
LPS+ 10uM inhibitor	Ccl2.	23.2707	23.3399	23.3053	0.0489268	20.8096	2.49565	10.8856
Control POSTTREAT	IL1b	30.7429	30.9845	30.8637	0.170815	21.9607	8.90297	0.997946
LPS	IL1b	22.1751	22.3147	22.2449	0.098714	21.6803	0.56454	323.016
5uM inhibitor	IL1b	30.8426	30.9842	30.9134	0.100137	21.7813	9.13211	0.851391
LPS+5 uM inhibitor	IL1b	22.3083	22.6495	22.4789	0.241236	22.0374	0.441498	351.773
10uM inhibitor	IL1b	30.8107	31.0232	30.9169	0.150217	21.9517	8.96526	0.955776
LPS+10uM inhibitor	IL1b	22.8327		22.8327	#DIV/0!	21.8572	0.975446	242.957
Control POSTTREAT	Tnf	33.8023	33.3436	33.5729	0.324311	21.9607	11.6122	0.998459
LPS	Tnf	28.0398	28.0014	28.0206	0.0271412	21.6803	6.34029	38.5782
5uM inhibitor	Tnf	33.2378	33.4089	33.3233	0.120959	21.7813	11.5421	1.04822
LPS+5 uM inhibitor	Tnf	27.7999	28.1768	27.9883	0.266516	22.0374	5.9509	50.531
10uM inhibitor	Tnf	33.4087	33.2901	33.3494	0.0838837	21.9517	11.3978	1.15849
LPS+10uM inhibitor	Tnf	28.3012	28.2468	28.274	0.0384514	21.8572	6.41682	36.585
Control POSTTREAT	Il1a	33.0179	33.361	33.1895	0.242631	21.9607	11.2287	0.993966
LPS	Il1a	25.0261	25.14	25.0831	0.0805295	21.6803	3.40277	225.539
5uM inhibitor	Il1a	34.032	34.0912	34.0616	0.0418501	21.7813	12.2803	0.479516
LPS+5 uM inhibitor	Il1a	25.6396	25.688	25.6638	0.0342381	22.0374	3.62637	193.157
10uM inhibitor	Il1a	33.6525	33.8611	33.7568	0.147515	21.9517	11.8052	0.666578
LPS+10uM inhibitor	Il1a	26.1675	26.5756	26.3716	0.288607	21.8572	4.51435	104.376
Control POSTTREAT	Ccl2.	30.6904	30.5404	30.6154	0.106072	21.9607	8.65466	0.996776
LPS	Ccl2.	24.2293	24.919	24.5742	0.487713	21.6803	2.89385	54.0471
5uM inhibitor	Ccl2.	30.6258	30.9573	30.7915	0.23442	21.7813	9.01024	0.779036
LPS+5 uM inhibitor	Ccl2.	24.7752	24.9336	24.8544	0.112001	22.0374	2.81701	57.0041
10uM inhibitor	Ccl2.	31.3318	31.5017	31.4168	0.120166	21.9517	9.46508	0.568376
LPS+10uM inhibitor	Ccl2.	25.0202	24.6911	24.8557	0.232699	21.8572	2.99844	50.2677
FIG 5D- p300 overexpression
P300											Fold repression
IL1 B	cntrl	pcDNA vector only	30.1582	29.9367	0.156591	30.0474	18.6981	11.3493	0	1
IL1 B	LPS	pcDNA vector only	23.3411	23.395	0.0381628	23.368	17.8576	5.51041	-5.83892	57.2388	2.49988
IL1 B	L + D	pcDNA vector only	24.7612	24.7618	0.000397866	24.7615	17.9292	6.83228	-4.51706	22.8966
IL1 B	cntrl	50 ng	26.5551	26.3006	0.179935	26.4278	18.3193	8.10854	-3.24079	9.45314
IL1 B	LPS	50 ng	23.62	23.6093	0.00753788	23.6147	17.9213	5.69334	-5.65599	50.4224	1.54063
IL1 B	L + D	50 ng	25.7151	25.6219	0.0658853	25.6685	19.3517	6.31687	-5.03247	32.7283
IL1 B	cntrl	100 ng	23.804	23.7811	0.0162006	23.7925	18.0194	5.7731	-5.57624	47.7106
IL1 B	LPS	100 ng	22.6521	22.6629	0.00763903	22.6575	17.9076	4.74986	-6.59947	96.9705	1.25676
IL1 B	L + D	100 ng	23.1974	23.04	0.111331	23.1187	18.0391	5.07957	-6.26976	77.1591
IL1 B	cntrl	150 ng	23.4478	23.1861	0.185039	23.3169	18.1432	5.17374	-6.17559	72.2833
IL1 B	LPS	150 ng	22.3419	22.1592	0.129147	22.2506	18.0002	4.25035	-7.09899	137.091	0.996318
IL1 B	L + D	150 ng	22.3576	22.3921	0.0243777	22.3749	18.1299	4.24503	-7.10431	137.597
Tnf	cntrl	pcDNA vector only	35.068	35.4409	35.2545	0.263687	22.67	12.5845	1.61946	0.996894
Tnf	LPS	pcDNA vector only	31.1516	31.3499	31.2508	0.140212	22.0315	9.21925	16.6881	10.2727	0.794656
Tnf	L + D	pcDNA vector only	31.154	31.0115	31.0828	0.100803	22.1951	8.88765	21.0004	12.9273
Tnf	cntrl	50 ng	33.9676	33.2227	33.5952	0.526683	22.3523	11.2428	4.10438	2.52654
Tnf	LPS	50 ng	30.3794	30.3797	30.3796	0.000215792	22.0077	8.37184	30.0264	18.4834	1.9393
Tnf	L + D	50 ng	32.0722	32.5685	32.3203	0.35095	22.993	9.32738	15.4831	9.53095
Tnf	cntrl	100 ng	34.2103	33.7781	33.9942	0.305621	21.6428	12.3514	1.90337	1.17166
Tnf	LPS	100 ng	30.8497	31.2578	31.0537	0.288618	21.6227	9.43104	14.4096	8.87013	1.24076
Tnf	L + D	100 ng	31.3797	31.6522	31.5159	0.192702	21.7737	9.74226	11.6135	7.14897
Tnf	cntrl	150 ng	33.2217	33.4646	33.3432	0.171743	22.1486	11.1946	4.24385	2.6124
Tnf	LPS	150 ng	31.539	31.8161	31.6775	0.195913	21.5488	10.1288	8.88408	5.46879	0.630552
Tnf	L + D	150 ng	31.3015	31.4435	31.3725	0.100444	21.9091	9.46346	14.0894	8.67302
Il1a	cntrl	pcDNA vector only		35.9122	35.9122	#DIV/0!	22.67	13.2422	0.881356	0.998474
Il1a	LPS	pcDNA vector only	30.4832	29.7879	30.1356	0.491693	22.0315	8.10405	31.0378	35.1622	4.17821
Il1a	L + D	pcDNA vector only	32.413	32.3111	32.362	0.0720745	22.1951	10.1669	7.42848	8.4156
Il1a	cntrl	50 ng	33.7829		33.7829	#DIV/0!	22.3523	11.4305	3.09397	3.50511
Il1a	LPS	50 ng	29.8148	29.9657	29.8903	0.106756	22.0077	7.88254	36.1885	40.9974	3.08332
Il1a	L + D	50 ng		32.5	32.5	#DIV/0!	22.993	9.50702	11.7369	13.2965
Il1a	cntrl	100 ng		31.323	31.323	#DIV/0!	21.6428	9.68022	10.4091	11.7923
Il1a	LPS	100 ng	29.9072	29.0163	29.4617	0.629953	21.6227	7.83906	37.2958	42.2518	1.03974
Il1a	L + D	100 ng	29.7605	29.5774	29.6689	0.12954	21.7737	7.89528	35.8703	40.6369
Il1a	cntrl	150 ng	29.7035	30.3279	30.0157	0.441505	22.1486	7.86711	36.5777	41.4383
Il1a	LPS	150 ng	28.9642	28.7551	28.8596	0.147874	21.5488	7.31089	53.7842	60.9312	0.619488
Il1a	L + D	150 ng	28.4708	28.5873	28.5291	0.0823758	21.9091	6.62004	86.8204	98.3574
Ccl2.	cntrl	pcDNA vector only	25.8348	26.1915	26.0131	0.252242	22.67	3.34315	3.9637	0.997817
Ccl2.	LPS	pcDNA vector only	23.6988	23.7691	23.7339	0.0496861	22.0315	1.70241	12.3598	3.11145	1.51894
Ccl2.	L + D	pcDNA vector only	24.5299	24.4713	24.5006	0.0414091	22.1951	2.30547	8.13717	2.04844
Ccl2.	cntrl	50 ng	23.8903	24.0019	23.9461	0.078911	22.3523	1.59373	13.3269	3.3549
Ccl2.	LPS	50 ng	23.0421	23.161	23.1016	0.0840671	22.0077	1.09385	18.8455	4.74414	0.74903
Ccl2.	L + D	50 ng	23.6921	23.6477	23.6699	0.0314139	22.993	0.676948	25.1599	6.33372
Ccl2.	cntrl	100 ng	22.3895	21.9003	22.1449	0.345922	21.6428	0.502146	28.4007	7.14956
Ccl2.	LPS	100 ng	21.5545	21.7951	21.6748	0.170167	21.6227	0.0521154	38.7973	9.76679	0.93182
Ccl2.	L + D	100 ng	21.6938	21.754	21.7239	0.0425366	21.7737	-0.0497618	41.6361	10.4814
Ccl2.	cntrl	150 ng	22.2027	21.9865	22.0946	0.152918	22.1486	-0.053956	41.7573	10.5119
Ccl2.	LPS	150 ng	21.5706	22.1421	21.8563	0.404127	21.5488	0.307573	32.5013	8.18185	0.40816
Ccl2.	L + D	150 ng	20.7223	21.1253	20.9238	0.284955	21.9091	-0.98522	79.6289	20.0457
p300	cntrl	pcDNA vector only	30.9701	30.9694	0.000473393	30.9697	18.6981	12.2716	0	1
p300	LPS	pcDNA vector only	30.2293	30.6123	0.270827	30.4208	17.8576	12.5632	0.291574	0.81701
p300	L + D	pcDNA vector only	30.6544	30.8699	0.152372	30.7622	17.9292	12.833	0.561308	0.677688
p300	cntrl	50 ng	27.2578	27.5091	0.177683	27.3835	18.3193	9.06421	-3.20743	9.23705
p300	LPS	50 ng	27.2627	27.2837	0.0147993	27.2732	17.9213	9.3519	-2.91975	7.56713
p300	L + D	50 ng	27.4933	27.3349	0.111977	27.4141	19.3517	8.06247	-4.20918	18.4965
p300	cntrl	100 ng	26.2222	26.284	0.0437194	26.2531	18.0194	8.2337	-4.03794	16.4264
p300	LPS	100 ng	26.1583	26.1237	0.0244748	26.141	17.9076	8.23339	-4.03825	16.4299
p300	L + D	100 ng	26.0758	26.3517	0.195072	26.2137	18.0391	8.1746	-4.09704	17.1133
P300	cntrl	150 ng	26.8847	26.5062	0.26761	26.6955	18.1432	8.55229	-3.71935	13.1715
P300	LPS	150 ng	26.6158	26.4822	0.0945195	26.549	18.0002	8.54879	-3.72285	13.2035
P300	L + D	150 ng	26.2825	26.3112	0.0203276	26.2969	18.1299	8.16702	-4.10462	17.2034
IL1 B	cntrl	pcDNA vector only	32.156	32.9639	0.571239	32.5599	19.4092	13.1507	0	1
IL1 B	LPS	pcDNA vector only	25.8769	26.0725	0.138275	25.9747	20.1854	5.78934	-7.36139	164.437	2.81378
IL1 B	L + D	pcDNA vector only	27.2926	27.0943	0.140227	27.1935	19.9116	7.28184	-5.86888	58.4398
IL1 B	cntrl	50 ng	28.5016	28.4599	0.0294758	28.4808	19.8703	8.6105	-4.54023	23.2672
IL1 B	LPS	50 ng	25.7801	25.7864	0.00442238	25.7833	19.4686	6.31463	-6.83609	114.253	2.70431
IL1 B	L + D	50 ng	29.1701		#DIV/0!	29.1701	21.4203	7.7499	-5.40083	42.2485
IL1 B	cntrl	100 ng	27.3178	27.3696	0.0365943	27.3437	19.0847	8.259	-4.89173	29.6863
IL1 B	LPS	100 ng	25.8625	25.9303	0.0479543	25.8964	19.8735	6.02283	-7.12789	139.865	2.49663
IL1 B	L + D	100 ng	26.3448	26.2182	0.0894983	26.2815	18.9387	7.34281	-5.80791	56.0215
IL1 B	cntrl	150 ng	26.163	26.152	0.00775637	26.1575	19.1303	7.0272	-6.12353	69.7213
IL1 B	LPS	150 ng	25.5171	25.5496	0.0229967	25.5334	19.29	6.24339	-6.90733	120.036	1.14765
IL1 B	L + D	150 ng	26.5596	26.5661	0.00454781	26.5628	20.1208	6.44208	-6.70864	104.593
Tnf	C (0ng)	31.2955	30.7503	0.385468	31.0229	19.4092	11.6137	0.00367989	0.997453
Tnf	L(0ng)	27.3342	27.1552	0.126554	27.2447	20.1854	7.0593	-4.5507	23.4367	2.14906
Tnf	L+D(0ng)	28.3374	27.8118	0.371617	28.0746	19.9116	8.163	-3.447	10.9056
Tnf	C (50ng)	29.6052	29.0253	0.410069	29.3153	19.8703	9.445	-2.165	4.48466
Tnf	L(50ng)		25.7102	#DIV/0!	25.7102	19.4686	6.24156	-5.36844	41.3107	1.6391
Tnf	L+D(50ng)		28.3747	#DIV/0!	28.3747	21.4203	6.95446	-4.65554	25.2033
Tnf	C(100ng)	28.8535	28.3956	0.323731	28.6246	19.0847	9.53982	-2.07018	4.19938
Tnf	L(100ng)	27.2743	26.9746	0.211895	27.1245	19.8735	7.25093	-4.35907	20.5216	2.1315
Tnf	L+D(100ng)	27.2815		#DIV/0!	27.2815	18.9387	8.3428	-3.2672	9.62775
Tnf	C(150ng)	28.3854	28.2464	0.0982811	28.3159	19.1303	9.18557	-2.42443	5.36817
Tnf	L(150ng)	26.0586	26.0781	0.0137392	26.0684	19.29	6.77837	-4.83163	28.4751	0.974909
Tnf	L+D(150ng)	26.8265	26.8985	0.0509066	26.8625	20.1208	6.74171	-4.86829	29.208
Il1a	C (0ng)	36.5239	35.9448	0.40946	36.2344	19.4092	16.8251	0.00513142	0.996449
Il1a	L(0ng)	30.4265	30.1819	0.172899	30.3042	20.1854	10.1188	-6.70116	104.052	3.58477
Il1a	L+D(0ng)	32.0432	31.7014	0.241686	31.8723	19.9116	11.9607	-4.85928	29.0261
Il1a	C (50ng)	33.7939	33.2262	0.401413	33.51	19.8703	13.6398	-3.18025	9.06462
Il1a	L(50ng)	31.0841	30.7508	0.235696	30.9174	19.4686	11.4488	-5.37118	41.3892	1.42276
Il1a	L+D(50ng)		33.3778	#DIV/0!	33.3778	21.4203	11.9575	-4.86249	29.0909
Il1a	C(100ng)	33.2948	33.1052	0.134028	33.2	19.0847	14.1152	-2.70475	6.51945
Il1a	L(100ng)	30.8658	30.7504	0.081626	30.8081	19.8735	10.9346	-5.88542	59.1138	1.93901
Il1a	L+D(100ng)	30.8815	30.7757	0.0748393	30.8286	18.9387	11.8899	-4.9301	30.4866
Il1a	C(150ng)	31.7495	31.6809	0.0484722	31.7152	19.1303	12.5849	-4.23514	18.8323
Il1a	L(150ng)	30.4333	30.296	0.0971144	30.3646	19.29	11.0747	-5.74535	53.644	1.48931
Il1a	L+D(150ng)	31.9925	31.5477	0.314517	31.7701	20.1208	11.6493	-5.1707	36.0193
Ccl2.	C (0ng)	25.2392		#DIV/0!	25.2392	19.4092	5.82996	7.69996	0.00480928
Ccl2.	L(0ng)	22.4774		#DIV/0!	22.4774	20.1854	2.29199	4.16199	0.0558619	1.02152
Ccl2.	L+D(0ng)	22.4645	22.0041	0.32556	22.2343	19.9116	2.32271	4.19271	0.0546849
Ccl2.	C (50ng)	24.0057	23.4264	0.409615	23.7161	19.8703	3.8458	5.7158	0.0190271
Ccl2.	L(50ng)	21.8868	21.4248	0.326689	21.6558	19.4686	2.18721	4.05721	0.0600702	0.947292
Ccl2.	L+D(50ng)	23.6611	23.3976	0.186339	23.5293	21.4203	2.10909	3.97909	0.0634125
Ccl2.	C(100ng)	22.6341	22.6924	0.0412082	22.6632	19.0847	3.57848	5.44848	0.0229004
Ccl2.	L(100ng)	22.021	21.7761	0.173182	21.8985	19.8735	2.02498	3.89498	0.0672192	1.28193
Ccl2.	L+D(100ng)	21.3284	21.3155	0.00915092	21.322	18.9387	2.3833	4.2533	0.052436
Ccl2.	C(150ng)	22.0007	21.9187	0.0580372	21.9597	19.1303	2.82936	4.69936	0.0384902
Ccl2.	L(150ng)	20.9748	20.9359	0.0275296	20.9553	19.29	1.66536	3.53536	0.0862484	0.749988
Ccl2.	L+D(150ng)	21.3813	21.3608	0.0144904	21.3711	20.1208	1.2503	3.1203	0.115
P300	cntrl	pcDNA vector only	30.6305	30.0154	0.434926	30.3229	19.4092	10.9137	0	1
P300	LPS	pcDNA vector only	28.9849	29.1853	0.141661	29.0851	20.1854	8.89973	-2.01398	4.03896
P300	L + D	pcDNA vector only	29.7733	30.9036	0.799226	30.3385	19.9116	10.4269	-0.486844	1.40138
P300	cntrl	50 ng		27.4996	#DIV/0!	27.4996	19.8703	7.62931	-3.28441	9.74329
P300	LPS	50 ng	26.9576	26.8748	0.0585834	26.9162	19.4686	7.44757	-3.46614	11.0513
P300	L + D	50 ng	27.7989	27.7022	0.0684128	27.7506	21.4203	6.3303	-4.58342	23.9743
P300	cntrl	100 ng	26.7197	26.878	0.111956	26.7988	19.0847	7.7141	-3.19962	9.18717
P300	LPS	100 ng	26.5107	26.7308	0.155645	26.6207	19.8735	6.74719	-4.16652	17.9576
P300	L + D	100 ng	26.8654	26.9989	0.0944346	26.9321	18.9387	7.99346	-2.92026	7.5698
P300	cntrl	150 ng		26.2987	#DIV/0!	26.2987	19.1303	7.16841	-3.74531	13.4106
P300	LPS	150 ng	26.1669	26.0151	0.1073	26.091	19.29	6.80102	-4.11269	17.2999
P300	L + D	150 ng	26.6585	26.5454	0.0799226	26.6019	20.1208	6.48119	-4.43253	21.5936
Il1b	Control	empty	29.9307	29.9642	29.9474	0.0236643	16.8459	13.1015	0.998928
Il1b	LPS	empty	22.9767		22.9767	#DIV/0!	16.8587	6.11797	126.416	3.18588
Il1b	L+D	empty	24.3536	24.3943	24.374	0.0287219	16.5843	7.78966	39.68
Il1b	Control	50ng p300	29.455	29.6042	29.5296	0.105507	16.8689	12.6607	1.35593
Il1b	LPS	50ng p300	23.8134	23.8471	23.8302	0.0238207	16.6453	7.1849	60.3423	1.71305
Il1b	L+D	50ng p300	24.7609	24.5524	24.6566	0.147417	16.6951	7.96147	35.2251
Il1b	Control	100ng p300	29.4653	29.2347	29.35	0.163105	16.858	12.492	1.52416
Il1b	LPS	100ng p300	23.9613	23.9165	23.9389	0.0316971	16.8178	7.12113	63.0693	2.34876
Il1b	L+D	100ng p300	25.0549	25.001	25.0279	0.038121	16.6749	8.35303	26.8522
Il1b	Control	150ng p300	29.1113	29.1136	29.1125	0.00161304	16.7901	12.3224	1.71429
Il1b	LPS	150ng p300	23.984	23.8658	23.9249	0.0835897	16.8666	7.05828	65.8779	2.07628
Il1b	L+D	150ng p300	25.1274	25.0007	25.064	0.0895779	16.9518	8.11228	31.7288
Il1a	Control	empty		32.6346	32.6346	#DIV/0!	16.8459	15.7887	0.993975
Il1a	LPS	empty	24.6465		24.6465	#DIV/0!	16.8587	7.78776	254.627	2.23255
Il1a	L+D	empty	25.6384	25.4231	25.5307	0.152298	16.5843	8.94645	114.053
Il1a	Control	50ng p300	32.1931	32.7062	32.4496	0.362814	16.8689	15.5808	1.1481
Il1a	LPS	50ng p300	25.3835	25.1689	25.2762	0.151749	16.6453	8.63087	141.939	1.22404
Il1a	L+D	50ng p300	25.6696	25.5658	25.6177	0.0734191	16.6951	8.92252	115.959
Il1a	Control	100ng p300	32.7073	32.5872	32.6472	0.0849222	16.858	15.7892	0.993628
Il1a	LPS	100ng p300	25.2748	25.2927	25.2837	0.012671	16.8178	8.46593	159.131	1.68136
Il1a	L+D	100ng p300	25.9987	25.7822	25.8904	0.153098	16.6749	9.21556	94.6443
Il1a	Control	150ng p300	31.7688		31.7688	#DIV/0!	16.7901	14.9787	1.74267
Il1a	LPS	150ng p300	25.4739	25.337	25.4054	0.0967759	16.8666	8.53884	151.288	1.55038
Il1a	L+D	150ng p300	26.2675	25.9789	26.1232	0.20406	16.9518	9.17147	97.5813
Tnf	Control	empty	26.7518	26.9302	26.841	0.126128	16.8459	9.99511	0.996466
Tnf	LPS	empty	24.2966		24.2966	#DIV/0!	16.8587	7.43785	5.86509	1.14593
Tnf	L+D	empty	24.1293	24.308	24.2187	0.126326	16.5843	7.63437	5.11817
Tnf	Control	50ng p300	25.3837	25.168	25.2759	0.152489	16.8689	8.40699	2.99594
Tnf	LPS	50ng p300	23.8827	23.6209	23.7518	0.185139	16.6453	7.10647	7.37956	0.665786
Tnf	L+D	50ng p300	23.2016	23.2278	23.2147	0.0185203	16.6951	6.5196	11.084
Tnf	Control	100ng p300	24.7953	25.2962	25.0457	0.354205	16.858	8.18772	3.48771
Tnf	LPS	100ng p300	23.8847	23.7052	23.795	0.126941	16.8178	6.97717	8.07149	1.14746
Tnf	L+D	100ng p300	23.4341	24.2669	23.8505	0.588941	16.6749	7.1756	7.03424
Tnf	Control	150ng p300	24.722	25.1836	24.9528	0.326431	16.7901	8.1627	3.54872
Tnf	LPS	150ng p300	23.5768	23.6173	23.597	0.0286315	16.8666	6.73046	9.57676	0.567849
Tnf	L+D	150ng p300	22.7583	22.9733	22.8658	0.152082	16.9518	5.91404	16.865
Ccl2.	Control	empty	24.7908	24.4198	24.6053	0.262321	20.7645	3.84075	0.99948
Ccl2.	LPS	empty	23.1738	23.2879	23.2309	0.0806158	20.6942	2.53663	2.46804	1.44258
Ccl2.	L+D	empty	23.9751	23.784	23.8795	0.135168	20.8143	3.06528	1.71085
Ccl2.	Control	50ng p300	25.2062	24.804	25.0051	0.284345	20.7614	4.24373	0.7559
Ccl2.	LPS	50ng p300	24.1195	23.931	24.0252	0.133304	20.6193	3.40591	1.35106	0.789205
Ccl2.	L+D	50ng p300	23.6335	23.63	23.6318	0.00249914	20.5674	3.06438	1.71192
Ccl2.	Control	100ng p300	24.636	24.6618	24.6489	0.0182155	20.6583	3.99057	0.900894
Ccl2.	LPS	100ng p300	23.5848	23.3742	23.4795	0.14889	20.6103	2.86919	1.95994	1.60841
Ccl2.	L+D	100ng p300	23.9469	23.7073	23.8271	0.169447	20.2723	3.55483	1.21856
Ccl2.	Control	150ng p300	24.4196		24.4196	#DIV/0!	20.4241	3.99545	0.897849
Ccl2.	LPS	150ng p300	23.8916	23.4593	23.6754	0.305613	20.0123	3.66319	1.13038	0.455333
Ccl2.	L+D	150ng p300	23.0524	23.0889	23.0707	0.0257979	20.5425	2.52819	2.48253
p300.	Control	empty	34.1771		34.1771	#DIV/0!	16.8459	17.3312	0.999179
p300.	LPS	empty		34.3792	34.3792	#DIV/0!	16.8587	17.5205	0.876297
p300.	L+D	empty		34.0812	34.0812	#DIV/0!	16.5843	17.4969	0.890748
p300.	Control	50ng p300	30.1938	30.1805	30.1872	0.00943415	16.8689	13.3183	16.1303
p300.	LPS	50ng p300	29.9826	29.5903	29.7865	0.277351	16.6453	13.1411	18.2381
p300.	L+D	50ng p300	30.055	29.684	29.8695	0.262399	16.6951	13.1744	17.8226
p300.	Control	100ng p300	29.2847	29.1539	29.2193	0.0924857	16.858	12.3612	31.3146
p300.	LPS	100ng p300	29.5521	29.3233	29.4377	0.161794	16.8178	12.6199	26.1743
p300.	L+D	100ng p300	29.1222	28.8855	29.0039	0.167375	16.6749	12.329	32.0222
p300.	Control	150ng p300	28.6834	28.5662	28.6248	0.0828492	16.7901	11.8347	45.1078
p300.	LPS	150ng p300	28.8393	28.4892	28.6643	0.247589	16.8666	11.7977	46.2799
p300.	L+D	150ng p300	28.8802	28.6484	28.7643	0.163944	16.9518	11.8125	45.8062
p300deltaHAT overexpression
Il1b	Control	empty	30.4603	30.9852	0.37113	30.7227	18.8841	11.8386	0	1
Il1b	LPS	empty	24.6511	24.3853	0.188014	24.5182	18.5769	5.94128	-5.89733	59.6035	2.87717
Il1b	L+D	empty	25.6934	25.747	0.0378971	25.7202	18.2543	7.46593	-4.37267	20.716
Il1b	Control	50ng deltaHAT	30.1332	30.1079	0.0178568	30.1206	18.6525	11.4681	-0.370498	1.2928
Il1b	LPS	50ng deltaHAT	25.0032	25.0596	0.0398581	25.0314	18.7189	6.31244	-5.52617	46.0832	1.83771
Il1b	L+D	50ng deltaHAT	26.1019	26.1015	0.000294016	26.1017	18.9113	7.19034	-4.64826	25.0764
Il1b	Control	100ng deltaHAT	29.8093	29.8544	0.0319089	29.8319	18.948	10.8839	-0.954724	1.93821
Il1b	LPS	100ng deltaHAT	24.9572	25.0768	0.0845634	25.017	18.8319	6.18505	-5.65355	50.3371	2.63138
Il1b	L+D	100ng deltaHAT	26.2816	26.1614	0.0849748	26.2215	18.6406	7.58087	-4.25773	19.1295
Il1b	Control	150ng deltaHAT	30.8901	30.7034	0.132042	30.7968	20.7884	10.0084	-1.8302	3.55586
Il1b	LPS	150ng deltaHAT	25.077	25.08	0.00215927	25.0785	18.9845	6.09403	-5.74458	53.6155	1.76216
Il1b	L+D	150ng deltaHAT	26.1558	26.1965	0.0287718	26.1762	19.2648	6.91137	-4.92723	30.426
Il1a	Control	empty	35.8385	35.6446	0.137171	35.7415	18.8841	16.8574	0	1
Il1a	LPS	empty	29.8341	29.7163	0.0833321	29.7752	18.5769	11.1983	-5.65914	50.5326	1.8014
Il1a	L+D	empty	30.3529	30.2505	0.0724144	30.3017	18.2543	12.0474	-4.81002	28.0518
Il1a	Control	50ng deltaHAT	35.0734		#DIV/0!	35.0734	18.6525	16.421	-0.436419	1.35324
Il1a	LPS	50ng deltaHAT	29.9465	30.2159	0.190443	30.0812	18.7189	11.3623	-5.49516	45.1033	1.48517
Il1a	L+D	50ng deltaHAT	30.8293	30.8591	0.021099	30.8442	18.9113	11.9329	-4.92453	30.3691
Il1a	Control	100ng deltaHAT	35.7594	35.5689	0.134692	35.6641	18.948	16.7161	-0.141285	1.10289
Il1a	LPS	100ng deltaHAT	29.956	30.1647	0.147608	30.0604	18.8319	11.2284	-5.62897	49.4869	2.7897
Il1a	L+D	100ng deltaHAT	31.3897	31.3085	0.0574182	31.3491	18.6406	12.7086	-4.14886	17.7391
Il1a	Control	150ng deltaHAT	35.834		#DIV/0!	35.834	20.7884	15.0456	-1.8118	3.51081
Il1a	LPS	150ng deltaHAT	30.7395	30.4074	0.234837	30.5735	18.9845	11.589	-5.26844	38.5442	1.24691
Il1a	L+D	150ng deltaHAT	31.1276	31.2166	0.062902	31.1721	19.2648	11.9073	-4.95008	30.9117
Tnf	Control	empty	29.6717	29.6998	0.0198475	29.6858	18.8841	10.8016	0	1
Tnf	LPS	empty	26.9992	26.8996	0.0704183	26.9494	18.5769	8.37246	-2.42918	5.38587	1.3858
Tnf	L+D	empty	27.0849	27.11	0.0177367	27.0975	18.2543	8.84319	-1.95846	3.88646
Tnf	Control	50ng deltaHAT	29.9587	29.6624	0.209483	29.8105	18.6525	11.1581	0.356437	0.781091
Tnf	LPS	50ng deltaHAT	26.9882	26.6201	0.260304	26.8042	18.7189	8.08525	-2.7164	6.57229	1.00301
Tnf	L+D	50ng deltaHAT		27.0009	#DIV/0!	27.0009	18.9113	8.08958	-2.71206	6.55257
Tnf	Control	100ng deltaHAT	30.5872	30.5434	0.0310241	30.5653	18.948	11.6173	0.81566	0.568149
Tnf	LPS	100ng deltaHAT		26.9848	#DIV/0!	26.9848	18.8319	8.15292	-2.64873	6.27114	1.37714
Tnf	L+D	100ng deltaHAT	27.3686	27.1418	0.160383	27.2552	18.6406	8.61459	-2.18705	4.55373
Tnf	Control	150ng deltaHAT	32.3963	32.6081	0.149803	32.5022	20.7884	11.7139	0.91221	0.531371
Tnf	LPS	150ng deltaHAT	26.6521	26.4853	0.117883	26.5687	18.9845	7.5842	-3.21744	9.30137	1.06002
Tnf	L+D	150ng deltaHAT		26.9331	#DIV/0!	26.9331	19.2648	7.66829	-3.13336	8.77474
Ccl2.	Control	empty	24.3649	24.5908	0.159768	24.4779	18.8841	5.59374	0	1
Ccl2.	LPS	empty	21.9022	21.8216	0.0569677	21.8619	18.5769	3.28496	-2.30878	4.95465	1.13084
Ccl2.	L+D	empty	21.6672	21.7661	0.0699004	21.7166	18.2543	3.46235	-2.13139	4.3814
Ccl2.	Control	50ng deltaHAT	24.2063	24.1415	0.0457843	24.1739	18.6525	5.52147	-0.0722704	1.05137
Ccl2.	LPS	50ng deltaHAT	21.6239	21.7569	0.0940906	21.6904	18.7189	2.97146	-2.62228	6.15723	0.94424
Ccl2.	L+D	50ng deltaHAT	21.8042	21.7958	0.00591405	21.8	18.9113	2.88868	-2.70506	6.52083
Ccl2.	Control	100ng deltaHAT	22.6671		#DIV/0!	22.6671	18.948	3.71914	-1.8746	3.667
Ccl2.	LPS	100ng deltaHAT	21.4161	21.5638	0.104393	21.4899	18.8319	2.658	-2.93574	7.65146	2.06708
Ccl2.	L+D	100ng deltaHAT	22.3462		#DIV/0!	22.3462	18.6406	3.7056	-1.88814	3.70158
Ccl2.	Control	150ng deltaHAT	25.2105	25.3629	0.107741	25.2867	20.7884	4.49836	-1.09538	2.13669
Ccl2.	LPS	150ng deltaHAT	21.9623	21.8382	0.087772	21.9002	18.9845	2.91572	-2.67802	6.39975	0.819116
Ccl2.	L+D	150ng deltaHAT	21.8373	21.948	0.0783311	21.8926	19.2648	2.62786	-2.96588	7.813
Il1b	Control	empty	29.4199	29.6605	29.5402	0.170118	16.8234	12.7168	0.995277
Il1b	LPS	empty	23.1576	23.0841	23.1209	0.0519694	16.7898	6.33107	83.2239	2.72291
Il1b	L+D	empty	24.468	24.3845	24.4262	0.0590595	16.65	7.77622	30.5643
Il1b	Control	50ng deltaHAT	29.4875	29.2187	29.3531	0.190048	16.8163	12.5368	1.12757
Il1b	LPS	50ng deltaHAT	23.0693	23.082	23.0757	0.00899582	16.683	6.39264	79.7472	3.4868
Il1b	L+D	50ng deltaHAT	24.9723	25.3013	25.1368	0.23261	16.9423	8.19454	22.8712
Il1b	Control	100ng deltaHAT	28.162	29.5133	28.8377	0.955524	16.5047	12.333	1.29866
Il1b	LPS	100ng deltaHAT	23.4492	23.4976	23.4734	0.0341963	16.7179	6.75554	62.0111	2.2556
Il1b	L+D	100ng deltaHAT	24.7649	24.7474	24.7561	0.0123339	16.8271	7.92906	27.4921
Il1b	Control	150ng deltaHAT	28.9647	28.8695	28.9171	0.0673001	16.917	12.0001	1.63571
Il1b	LPS	150ng deltaHAT	23.2779	23.3677	23.3228	0.0635251	16.8066	6.51619	73.202	2.7784
Il1b	L+D	150ng deltaHAT	24.8519	24.8833	24.8676	0.0221537	16.8772	7.99044	26.3468
Il1a	Control	empty	31.5525	31.7506	31.6516	0.140116	16.8234	14.8282	0.248586
Il1a	LPS	empty	24.219	24.1755	24.1972	0.0307261	16.7898	7.40745	42.5932	2.18005
Il1a	L+D	empty	25.2311	25.1326	25.1818	0.0696185	16.65	8.53181	19.5377
Il1a	Control	50ng deltaHAT	31.582	31.7269	31.6545	0.102412	16.8163	14.8382	0.24687
Il1a	LPS	50ng deltaHAT	24.0805	24.1037	24.0921	0.0163732	16.683	7.40907	42.5452	6.82207
Il1a	L+D	50ng deltaHAT		27.1216	27.1216	#DIV/0!	16.9423	10.1793	6.23641
Il1a	Control	100ng deltaHAT	30.912	31.5098	31.2109	0.422751	16.5047	14.7062	0.27052
Il1a	LPS	100ng deltaHAT	23.9073	24.5205	24.2139	0.433607	16.7179	7.49608	40.0553	2.31196
Il1a	L+D	100ng deltaHAT	25.7355	25.3291	25.5323	0.287415	16.8271	8.7052	17.3252
Il1a	Control	150ng deltaHAT	31.1492	31.3667	31.258	0.153771	16.917	14.3409	0.34846
Il1a	LPS	150ng deltaHAT	24.3419	24.3364	24.3392	0.00393685	16.8066	7.53255	39.0555	2.04261
Il1a	L+D	150ng deltaHAT	25.3696	25.5106	25.4401	0.0996945	16.8772	8.56296	19.1204
Tnfa	Control	empty	25.7314	26.2971	26.0143	0.400075	16.8234	9.19087	0.9994
Tnfa	LPS	empty	24.5295	23.8127	24.1711	0.506817	16.7898	7.38131	3.50323	0.942841
Tnfa	L+D	empty	23.9565	23.9363	23.9464	0.0142477	16.65	7.2964	3.71561
Tnfa	Control	50ng deltaHAT	22.3309	22.8717	22.6013	0.382383	16.8163	5.78505	10.5923
Tnfa	LPS	50ng deltaHAT	25.9188	26.6833	26.301	0.540595	16.683	9.61802	0.743279	0.117517
Tnfa	L+D	50ng deltaHAT	23.7369	23.2056	23.4712	0.375649	16.9423	6.52896	6.32488
Tnfa	Control	100ng deltaHAT	25.5372	25.7442	25.6407	0.146378	16.5047	9.136	1.03814
Tnfa	LPS	100ng deltaHAT	23.0964	23.6321	23.3642	0.378801	16.7179	6.64638	5.8305	0.58748
Tnfa	L+D	100ng deltaHAT	22.5176	22.8946	22.7061	0.266553	16.8271	5.87899	9.92459
Tnfa	Control	150ng deltaHAT	25.5628	25.6845	25.6236	0.0860686	16.917	8.70661	1.39802
Tnfa	LPS	150ng deltaHAT	22.5635		22.5635	#DIV/0!	16.8066	5.75684	10.8015	1.66288
Tnfa	L+D	150ng deltaHAT	23.3984	23.337	23.3677	0.0433728	16.8772	6.49052	6.49566
Ccl2.	Control	empty	24.7443	24.4248	24.5845	0.225922	20.1903	4.39419	0.9971
Ccl2.	LPS	empty	23.0552	23.0032	23.0292	0.0367588	20.1934	2.83584	2.93664	1.13989
Ccl2.	L+D	empty	22.9369	23.1027	23.0198	0.117211	19.995	3.02473	2.57624
Ccl2.	Control	50ng deltaHAT	24.1857	23.9264	24.0561	0.18333	19.971	4.08504	1.23538
Ccl2.	LPS	50ng deltaHAT	22.7851	22.628	22.7066	0.11109	19.7923	2.91425	2.78127	1.15066
Ccl2.	L+D	50ng deltaHAT	23.3281	23.4439	23.386	0.0819052	20.2693	3.11672	2.41711
Ccl2.	Control	100ng deltaHAT		23.925	23.925	#DIV/0!	20.5978	3.32718	2.089
Ccl2.	LPS	100ng deltaHAT	22.488	22.8801	22.684	0.277271	19.8961	2.78791	3.03582	0.968188
Ccl2.	L+D	100ng deltaHAT	23.3223	23.2452	23.2838	0.0545117	20.5425	2.74127	3.13557
Ccl2.	Control	150ng deltaHAT	23.8319	23.8874	23.8597	0.0392471	20.536	3.32369	2.09407
Ccl2.	LPS	150ng deltaHAT	23.6341	23.4159	23.525	0.15428	20.1885	3.33645	2.07563	0.858302
Ccl2.	L+D	150ng deltaHAT		23.481	23.481	#DIV/0!	20.365	3.11601	2.4183
p300.	Control	empty	34.3548	34.7105	34.5327	0.251543	16.8234	17.7093	0.768826
p300.	LPS	empty	33.1298	33.3766	33.2532	0.174505	16.7898	16.4634	1.82333
p300.	L+D	empty	32.7579	33.6854	33.2217	0.65587	16.65	16.5716	1.69158
p300.	Control	50ng deltaHAT	30.2962	30.6755	30.4858	0.268231	16.8163	13.6695	12.6446
p300.	LPS	50ng deltaHAT	28.7168	28.7983	28.7576	0.0575787	16.683	12.0745	38.1993
p300.	L+D	50ng deltaHAT	29.7488	29.8397	29.7942	0.06431	16.9423	12.852	22.2857
p300.	Control	100ng deltaHAT	28.4789	28.5267	28.5028	0.0338011	16.5047	11.9981	40.2762
p300.	LPS	100ng deltaHAT	28.5265	28.8098	28.6681	0.200349	16.7179	11.9503	41.6352
p300.	L+D	100ng deltaHAT	28.3656	28.4985	28.432	0.0940057	16.8271	11.605	52.8942
p300.	Control	150ng deltaHAT	28.8635	28.9287	28.8961	0.046139	16.917	11.9791	40.8119
p300.	LPS	150ng deltaHAT	27.4972	27.6882	27.5927	0.135122	16.8066	10.7861	93.3073
p300.	L+D	150ng deltaHAT	27.9871	28.128	28.0575	0.0996217	16.8772	11.1804	70.9939
Il1b.	Control	empty	30.2676	29.9055	30.0866	0.256079	17.1078	12.9788	0.993924
Il1b.	LPS	empty	23.8854	23.9694	23.9274	0.0594318	16.9466	6.98077	63.5238	2.7515
Il1b.	L+D	empty	25.6403	25.5769	25.6086	0.0448186	17.1676	8.44099	23.087
Il1b.	Control	50ng deltaHAT	29.269	29.4608	29.3649	0.135616	16.9283	12.4366	1.44731
Il1b.	LPS	50ng deltaHAT	24.9396	24.9289	24.9343	0.00753383	16.8545	8.07978	29.6554	2.26102
Il1b.	L+D	50ng deltaHAT	26.3984	26.3036	26.351	0.0670196	17.0943	9.25675	13.1159
Il1b.	Control	100ng deltaHAT	29.188	29.0806	29.1343	0.0758873	16.9872	12.1471	1.76894
Il1b.	LPS	100ng deltaHAT	24.7047	25.1521	24.9284	0.31634	16.9308	7.9976	31.3937	3.20885
Il1b.	L+D	100ng deltaHAT	26.4932	26.5916	26.5424	0.0695686	16.8628	9.67966	9.78345
Il1b.	Control	150ng deltaHAT	28.8483	28.9296	28.8889	0.0574721	16.9707	11.9183	2.07304
Il1b.	LPS	150ng deltaHAT	25.2521	25.3199	25.286	0.0478829	16.8755	8.41047	23.5806	2.31542
Il1b.	L+D	150ng deltaHAT	26.3661	26.6522	26.5091	0.20232	16.8874	9.62174	10.1842
Il1a.	Control	empty	31.7548	32.2048	31.9798	0.318196	17.1078	14.872	0.998582
Il1a.	LPS	empty	25.1295	25.1552	25.1424	0.0181602	16.9466	8.19574	102.13	1.59161
Il1a.	L+D	empty	26.1206	25.9471	26.0338	0.122693	17.1676	8.86622	64.1677
Il1a.	Control	50ng deltaHAT	31.5481	31.4028	31.4754	0.102695	16.9283	14.5471	1.25081
Il1a.	LPS	50ng deltaHAT	25.7265	25.7194	25.723	0.00507111	16.8545	8.86849	64.0671	2.15456
Il1a.	L+D	50ng deltaHAT	26.8522	27.2881	27.0702	0.308288	17.0943	9.97588	29.7356
Il1a.	Control	100ng deltaHAT	32.2031	31.0544	31.6287	0.812214	16.9872	14.6416	1.17157
Il1a.	LPS	100ng deltaHAT	25.9514	26.1019	26.0267	0.106426	16.9308	9.09583	54.7266	1.97365
Il1a.	L+D	100ng deltaHAT	26.9798	26.8991	26.9395	0.0570877	16.8628	10.0767	27.7286
Il1a.	Control	150ng deltaHAT	31.4798	30.9442	31.212	0.378731	16.9707	14.2413	1.54619
Il1a.	LPS	150ng deltaHAT	26.2041	26.188	26.196	0.0114302	16.8755	9.32052	46.8338	1.75195
Il1a.	L+D	150ng deltaHAT	26.8527	27.181	27.0169	0.232129	16.8874	10.1295	26.7324
Tnf	Control	empty	26.2014	26.7405	26.471	0.381144	17.1078	9.36319	0.99779
Tnf	LPS	empty	22.7423	22.784	22.7631	0.0294934	16.9466	5.81651	11.66	2.9583
Tnf	L+D	empty	24.3822	24.7155	24.5489	0.235677	17.1676	7.38127	3.94145
Tnf	Control	50ng deltaHAT	25.6633	25.625	25.6441	0.0271372	16.9283	8.71585	1.56282
Tnf	LPS	50ng deltaHAT	23.2313	23.6627	23.447	0.305019	16.8545	6.59256	6.80901	0.869192
Tnf	L+D	50ng deltaHAT	23.3189	23.6503	23.4846	0.234365	17.0943	6.3903	7.83372
Tnf	Control	100ng deltaHAT	25.9025	26.4792	26.1909	0.407756	16.9872	9.20368	1.11444
Tnf	LPS	100ng deltaHAT	22.4396	22.7192	22.5794	0.197704	16.9308	5.64859	13.0992	1.75791
Tnf	L+D	100ng deltaHAT	23.131	23.5195	23.3252	0.27471	16.8628	6.46246	7.45156
Tnf	Control	150ng deltaHAT	25.2817	25.4591	25.3704	0.125418	16.9707	8.39976	1.94564
Tnf	LPS	150ng deltaHAT	22.5309	23.0709	22.8009	0.381821	16.8755	5.92535	10.8126	1.98788
Tnf	L+D	150ng deltaHAT	23.417	24.1909	23.804	0.547239	16.8874	6.91658	5.43929
Ccl2.	Control	empty	23.9697	24.6155	24.2926	0.456602	18.4957	5.79691	0.995225
Ccl2.	LPS	empty	23.932	23.9933	23.9627	0.0432946	18.3627	5.6	1.14076	0.578735
Ccl2.	L+D	empty	22.8961	23.1774	23.0367	0.198937	18.2257	4.81098	1.97113
Ccl2.	Control	50ng deltaHAT	24.1691	24.189	24.179	0.0140561	18.596	5.58305	1.15425
Ccl2.	LPS	50ng deltaHAT	23.8197	24.3135	24.0666	0.349146	18.5285	5.5381	1.19078	0.952264
Ccl2.	L+D	50ng deltaHAT	24.173	24.3122	24.2426	0.0984442	18.7751	5.46753	1.25047
Ccl2.	Control	100ng deltaHAT		24.5106	24.5106	#DIV/0!	18.6067	5.90382	0.924135
Ccl2.	LPS	100ng deltaHAT	23.7237	23.9116	23.8176	0.132879	18.5354	5.28221	1.42187	0.740805
Ccl2.	L+D	100ng deltaHAT	23.5451	23.834	23.6896	0.204269	18.8402	4.84937	1.91936
Ccl2.	Control	150ng deltaHAT	24.1217	24.4841	24.3029	0.256266	18.5232	5.77968	1.00718
Ccl2.	LPS	150ng deltaHAT	22.9159	23.413	23.1645	0.351498	18.26	4.90448	1.84743	1.55914
Ccl2.	L+D	150ng deltaHAT	23.197	23.6155	23.4062	0.295952	17.861	5.54523	1.1849
p300.	Control	empty		35.4138	35.4138	#DIV/0!	17.1078	18.306	0.448754
p300.	LPS	empty	35.003		35.003	#DIV/0!	16.9466	18.0563	0.533536
p300.	L+D	empty	30.5431		30.5431	#DIV/0!	17.1676	13.3755	13.6846
p300.	Control	50ng deltaHAT	30.4289	29.9081	30.1685	0.368227	16.9283	13.2402	15.0302
p300.	LPS	50ng deltaHAT	29.4238	29.7585	29.5911	0.236663	16.8545	12.7366	21.3085
p300.	L+D	50ng deltaHAT	30.1807	30.2783	30.2295	0.068963	17.0943	13.1352	16.1646
p300.	Control	100ng deltaHAT	29.0701	29.3879	29.229	0.224678	16.9872	12.2418	30.0265
p300.	LPS	100ng deltaHAT		29.0538	29.0538	#DIV/0!	16.9308	12.123	32.6056
p300.	L+D	100ng deltaHAT	28.9478	28.7579	28.8529	0.134275	16.8628	11.9901	35.751
p300.	Control	150ng deltaHAT	28.028	28.0856	28.0568	0.0406808	16.9707	11.0861	66.8976
p300.	LPS	150ng deltaHAT	28.3642	28.4767	28.4204	0.0795611	16.8755	11.5449	48.6738
p300.	L+D	150ng deltaHAT	28.6309	28.3201	28.4755	0.219768	16.8874	11.5881	47.2381
p300.

## Sheet: Fig5B.
p300 ChIP for Dex-insensitive genes (5B-left)
						dCT (relative to input)	ddCT(relative to IgG)	Fold change	StD dCT	StD ddCT	STDERR FC	IgG		Over control	Avg IgG
Cxcl10 -100bp	Control IgG	Undetermined	Undetermined	#DIV/0!	#DIV/0!	#DIV/0!			#DIV/0!			#DIV/0!	#DIV/0!	#DIV/0!
Cxcl10 -100bp	LPS IgG	38.3104	38.7012	38.5058	0.276308	-10.4343			0.26			0	1	0.64933
Cxcl10 -100bp	L+D IgG	37.9671	37.3634	37.6652	0.426893	-9.62029			0.31			0.814033	1.75812	1.1416	0.895465
Cxcl10 -100bp	Control p300	38.0503	37.5433	37.7968	0.358444	-9.81134	0.622976	1.54005	0.25	#DIV/0!	#DIV/0!			1
Cxcl10 -100bp	LPS p300	36.3925	35.7775	36.085	0.434858	-8.01354	2.42078	5.3546	0.35	0.44	1.6			3.4769
Cxcl10 -100bp	L+D p300	35.2155	34.9505	35.083	0.187383	-7.03803	3.39629	10.529	0.16	0.35	2.6			6.83677
Cxcl10 -100bp	Control input	28.0106	27.9603	27.9855	0.0355638
Cxcl10 -100bp	LPS input	28.2466	27.8963	28.0715	0.24769
Cxcl10 -100bp	L+D input	28.1337	27.9562	28.0449	0.125523
Cxcl10 -100bp	Control IgG	36.8177		36.8177	#DIV/0!	-9.73138			#DIV/0!			1.35422	2.55658	1.95137
Cxcl10 -100bp	LPS IgG	38.5033	38.0744	38.2889	0.303244	-11.0856			0.22			0	1	0.763271
Cxcl10 -100bp	L+D IgG	38.514	Undetermined	38.514	#DIV/0!	-11.2345			#DIV/0!			-0.148889	0.901945	0.688429	1.13436
Cxcl10 -100bp	Control p300	37.7821		37.7821	#DIV/0!	-10.6959	0.389732	1.31015	#DIV/0!	#DIV/0!	#DIV/0!			1
Cxcl10 -100bp	LPS p300	36.5791	36.2541	36.4166	0.229781	-9.21331	1.87229	3.66112	0.17	0.28	0.7			2.79443
Cxcl10 -100bp	L+D p300	35.6823	35.5871	35.6347	0.0673298	-8.35518	2.73041	6.63645	0.17	#DIV/0!	#DIV/0!			5.06541
Cxcl10 -100bp	Control input	27.0425	27.13	27.0863	0.0618797
Cxcl10 -100bp	LPS input	27.2498	27.1567	27.2033	0.0658287
Cxcl10 -100bp	L+D input	27.4411	27.1179	27.2795	0.228548
Cxcl10 -100bp	Control IgG	39.4077		39.4077	#DIV/0!	-9.67698			#DIV/0!			-0.623652	0.649026	0.729087
Cxcl10 -100bp	LPS IgG		38.1751	38.1751	#DIV/0!	-9.05333			#DIV/0!			0	1	1.12336
Cxcl10 -100bp	L+D IgG	Undetermined	Undetermined	#DIV/0!	#DIV/0!	#DIV/0!			#DIV/0!			#DIV/0!	#DIV/0!	#DIV/0!	0.926221
Cxcl10 -100bp	Control p300	39.3987	38.5051	38.9519	0.631833	-9.22114	-0.167815	0.89019	0.45	#DIV/0!	#DIV/0!			1
Cxcl10 -100bp	LPS p300	36.4309	36.5175	36.4742	0.0612444	-7.35244	1.70089	3.25101	0.17	#DIV/0!	#DIV/0!			3.65204
Cxcl10 -100bp	L+D p300		36.5725	36.5725	#DIV/0!	-7.02203	2.0313	4.08773	#DIV/0!	#DIV/0!	#DIV/0!			4.59198
Cxcl10 -100bp	Control input	29.8102	29.6513	29.7307	0.112375
Cxcl10 -100bp	LPS input	29.2832	28.9603	29.1218	0.228297
Cxcl10 -100bp	L+D input	29.7479	29.3529	29.5504	0.279329
Cxcl10 -100bp	Control IgG	39.765	39.1404	39.4527	0.441672	-10.587			0.31			-0.169725	0.889012	0.294081
Cxcl10 -100bp	LPS IgG	39.1334		39.1334	#DIV/0!	-10.4173			#DIV/0!			0	1	0.330795
Cxcl10 -100bp	L+D IgG	38.201	39.1119	38.6565	0.644106	-9.23837			0.47			1.17889	2.26403	0.748931	0.457935
Cxcl10 -100bp	Control p300	37.5311	37.8429	37.687	0.220502	-8.82127	1.59599	3.02302	0.16	0.35	0.7			1
Cxcl10 -100bp	LPS p300	34.89	35.0088	34.9494	0.083943	-6.23322	4.18404	18.177	0.15	#DIV/0!	#DIV/0!			6.01287
Cxcl10 -100bp	L+D p300	36.3025	35.5463	35.9244	0.534757	-6.50628	3.91099	15.0427	0.4	0.61	6.4			4.97603
Cxcl10 -100bp	Control input	28.8344	28.897	28.8657	0.0442495
Cxcl10 -100bp	LPS input	28.8496	28.5827	28.7162	0.188695
Cxcl10 -100bp	L+D input	29.5359	29.3004	29.4181	0.166545
Cxcl10 -100bp	Control IgG	39.3036	Undetermined	39.3036	#DIV/0!	-9.69186			#DIV/0!			-1.22017	0.429233	0.414252
Cxcl10 -100bp	LPS IgG	Undetermined	38.0763	38.0763	#DIV/0!	-8.47169			#DIV/0!			0	1	0.965098
Cxcl10 -100bp	L+D IgG	Undetermined	38.3802	38.3802	#DIV/0!	-9.2279			#DIV/0!			-0.756207	0.592051	0.571387	0.650246
Cxcl10 -100bp	Control p300	37.9356	38.1288	38.0322	0.136569	-8.42044	0.0512533	1.03616	0.26	#DIV/0!	#DIV/0!			1
Cxcl10 -100bp	LPS p300	36.6715	35.8779	36.2747	0.561159	-6.67008	1.80161	3.48608	0.41	#DIV/0!	#DIV/0!			3.36441
Cxcl10 -100bp	L+D p300	35.4195	35.2874	35.3534	0.0933435	-6.20118	2.27051	4.82494	0.07	#DIV/0!	#DIV/0!			4.65653
Cxcl10 -100bp	Control input	29.8482	29.3753	29.6118	0.334361
Cxcl10 -100bp	LPS input	29.495	29.7143	29.6046	0.155121
Cxcl10 -100bp	L+D input	29.1221	29.1824	29.1523	0.0426175
Cd40 -450bp	Control IgG	Undetermined	Undetermined	#DIV/0!	#DIV/0!	#DIV/0!			#DIV/0!			#DIV/0!	#DIV/0!	#DIV/0!
Cd40 -450bp	LPS IgG		39.3946	39.3946	#DIV/0!	-10.4131			#DIV/0!			0	1	0.337802
Cd40 -450bp	L+D IgG	38.1839	38.3708	38.2773	0.132105	-9.27464			0.1			1.13845	2.20144	0.743653	0.540728
Cd40 -450bp	Control p300	37.7143	37.6933	37.7038	0.0147817	-8.84734	1.56575	2.96031	0.07	#DIV/0!	#DIV/0!			1
Cd40 -450bp	LPS p300	35.9615	36.0317	35.9966	0.0496672	-7.01512	3.39797	10.5412	0.12	#DIV/0!	#DIV/0!			3.56085
Cd40 -450bp	L+D p300	34.5937	35.001	34.7973	0.288001	-5.79463	4.61846	24.5637	0.21	0.23	3.9			8.29767
Cd40 -450bp	Control input	28.7882	28.9247	28.8565	0.0965143
Cd40 -450bp	LPS input	29.0915	28.8714	28.9815	0.155613
Cd40 -450bp	L+D input	28.9753	29.0301	29.0027	0.0387535
Cd40 -450bp	Control IgG	37.04	37.7705	37.4052	0.516557	-9.95732			0.37			1.31723	2.49187	1.29303
Cd40 -450bp	LPS IgG	38.832	39.3697	39.1008	0.380177	-11.2745			0.32			0	1	0.518898
Cd40 -450bp	L+D IgG	38.5179	38.1695	38.3437	0.246305	-10.5842			0.17			0.690373	1.6137	0.837347	0.88309
Cd40 -450bp	Control p300	37.4509	38.101	37.776	0.459653	-10.3281	0.946476	1.92716	0.33	0.49	0.7			1
Cd40 -450bp	LPS p300	36.4371	36.87	36.6536	0.306165	-8.82725	2.44729	5.45392	0.28	0.42	1.6			2.83003
Cd40 -450bp	L+D p300	35.0769	35.0774	35.0772	0.000345267	-7.31762	3.95693	15.5293	0.01	0.18	1.9			8.05815
Cd40 -450bp	Control input	27.4469	27.4489	27.4479	0.00136623
Cd40 -450bp	LPS input	27.9965	27.6561	27.8263	0.240706
Cd40 -450bp	L+D input	27.7452	27.7738	27.7595	0.0202008
Cd40 -450bp	Control IgG		39.982	39.982	#DIV/0!	-9.99381			#DIV/0!			-0.372236	0.772584	0.452487
Cd40 -450bp	LPS IgG		39.0848	39.0848	#DIV/0!	-9.62158			#DIV/0!			0	1	0.58568
Cd40 -450bp	L+D IgG	Undetermined	Undetermined	#DIV/0!	#DIV/0!	#DIV/0!			#DIV/0!			#DIV/0!	#DIV/0!	#DIV/0!	0.519083
Cd40 -450bp	Control p300	38.828	38.8479	38.838	0.0140615	-8.84976	0.771816	1.70742	0.06	#DIV/0!	#DIV/0!			1
Cd40 -450bp	LPS p300	36.5032	36.5095	36.5064	0.00443183	-7.04314	2.57844	5.97293	0.01	#DIV/0!	#DIV/0!			3.49823
Cd40 -450bp	L+D p300	37.5707	37.1181	37.3444	0.32003	-7.51886	2.10271	4.29517	0.25	#DIV/0!	#DIV/0!			2.51559
Cd40 -450bp	Control input	29.9284	30.0481	29.9882	0.0846187
Cd40 -450bp	LPS input	29.4771	29.4493	29.4632	0.0196681
Cd40 -450bp	L+D input	29.7204	29.9306	29.8255	0.148615
Cd40 -450bp	Control IgG	Undetermined	Undetermined	#DIV/0!	#DIV/0!	#DIV/0!			#DIV/0!			#DIV/0!	#DIV/0!	#DIV/0!
Cd40 -450bp	LPS IgG	Undetermined	39.6246	39.6246	#DIV/0!	-10.3641			#DIV/0!			0	1	0.302376
Cd40 -450bp	L+D IgG	Undetermined	39.8872	39.8872	#DIV/0!	-10.1868			#DIV/0!			0.177331	1.13079	0.341924	0.32215
Cd40 -450bp	Control p300	38.2057	37.873	38.0394	0.235246	-8.63856	1.72558	3.30714	0.17	#DIV/0!	#DIV/0!			1
Cd40 -450bp	LPS p300	35.0875	34.8058	34.9467	0.199227	-5.68616	4.67799	25.5986	0.14	#DIV/0!	#DIV/0!			7.7404
Cd40 -450bp	L+D p300	35.9673	35.984	35.9756	0.0118335	-6.27521	4.08894	17.0174	0.11	#DIV/0!	#DIV/0!			5.14567
Cd40 -450bp	Control input	29.45	29.3516	29.4008	0.0695807
Cd40 -450bp	LPS input	29.2669	29.2541	29.2605	0.00900257
Cd40 -450bp	L+D input	29.5895	29.8114	29.7004	0.156878
Cd40 -450bp	Control IgG	Undetermined	Undetermined	#DIV/0!	#DIV/0!	#DIV/0!			#DIV/0!			#DIV/0!	#DIV/0!	#DIV/0!
Cd40 -450bp	LPS IgG	Undetermined	39.9033	39.9033	#DIV/0!	-10.3011			#DIV/0!			0	1	0.35793
Cd40 -450bp	L+D IgG	Undetermined	38.7325	38.7325	#DIV/0!	-9.47951			#DIV/0!			0.821563	1.76732	0.632577	0.495254
Cd40 -450bp	Control p300	38.1249	39.126	38.6254	0.707892	-8.81883	1.48225	2.79384	0.5	#DIV/0!	#DIV/0!			1
Cd40 -450bp	LPS p300	35.8618	35.6672	35.7645	0.137619	-6.16226	4.13881	17.616	0.15	#DIV/0!	#DIV/0!			6.30529
Cd40 -450bp	L+D p300	35.3588	35.5357	35.4473	0.125076	-6.19425	4.10683	17.2297	0.14	#DIV/0!	#DIV/0!			6.16704
Cd40 -450bp	Control input	29.7446	29.8686	29.8066	0.0877207
Cd40 -450bp	LPS input	29.4899	29.7146	29.6022	0.15885
Cd40 -450bp	L+D input	29.1428	29.3632	29.253	0.155849
Tnfsf9 -800bp	Control IgG	39.9282		39.9282	#DIV/0!	-11.6738			#DIV/0!			-0.610578	0.654934	0.214548
Tnfsf9 -800bp	LPS IgG	39.3168	39.4383	39.3775	0.085931	-11.0632			0.17			0	1	0.327587
Tnfsf9 -800bp	L+D IgG	37.7352	38.5499	38.1425	0.576097	-10.0648			0.43			0.998391	1.99777	0.654444	0.39886
Tnfsf9 -800bp	Control p300	37.9068	37.5083	37.7076	0.281749	-9.45317	1.61005	3.05262	0.3	#DIV/0!	#DIV/0!			1
Tnfsf9 -800bp	LPS p300	36.2466	35.9752	36.1109	0.191893	-7.7966	3.26662	9.62391	0.21	0.27	1.8			3.15267
Tnfsf9 -800bp	L+D p300	34.1838	33.8201	34.002	0.257213	-5.92424	5.13898	35.236	0.23	0.49	12			11.5429
Tnfsf9 -800bp	Control input	28.0326	28.4761	28.2544	0.313616
Tnfsf9 -800bp	LPS input	28.1588	28.4698	28.3143	0.219934
Tnfsf9 -800bp	L+D input	27.9324	28.223	28.0777	0.205526
Tnfsf9 -800bp	Control IgG		37.1796	37.1796	#DIV/0!	-10.2504			#DIV/0!			1.02934	2.04109	1.52843
Tnfsf9 -800bp	LPS IgG	38.0965	38.0395	38.068	0.0402856	-11.2797			0.1			0	1	0.748833
Tnfsf9 -800bp	L+D IgG	37.6111		37.6111	#DIV/0!	-10.5163			#DIV/0!			0.763392	1.69748	1.27113	1.1828
Tnfsf9 -800bp	Control p300	37.9282	37.6551	37.7917	0.193134	-10.8624	0.417284	1.33541	0.4	#DIV/0!	#DIV/0!			1
Tnfsf9 -800bp	LPS p300	37.5959		37.5959	#DIV/0!	-10.8077	0.472078	1.38711	#DIV/0!	#DIV/0!	#DIV/0!			1.03871
Tnfsf9 -800bp	L+D p300	34.3306	34.9551	34.6429	0.441559	-7.54815	3.73158	13.2836	0.35	#DIV/0!	#DIV/0!			9.94722
Tnfsf9 -800bp	Control input	26.5536	27.3049	26.9292	0.531224
Tnfsf9 -800bp	LPS input	26.6946	26.882	26.7883	0.132503
Tnfsf9 -800bp	L+D input	26.9396	27.2498	27.0947	0.219342
Tnfsf9 -800bp	Control IgG	Undetermined	Undetermined	#DIV/0!	#DIV/0!	#DIV/0!			#DIV/0!			#DIV/0!	#DIV/0!	#DIV/0!
Tnfsf9 -800bp	LPS IgG	Undetermined	Undetermined	#DIV/0!	#DIV/0!	#DIV/0!			#DIV/0!			#DIV/0!	#DIV/0!	#DIV/0!
Tnfsf9 -800bp	L+D IgG	39.9084		39.9084	#DIV/0!	-10.0471			#DIV/0!			0	1	0.407495	0.407495
Tnfsf9 -800bp	Control p300	38.4775	39.2858	38.8817	0.571544	-8.75196	1.29515	2.45402	0.42	#DIV/0!	#DIV/0!			1
Tnfsf9 -800bp	LPS p300	36.2739	36.6075	36.4407	0.235909	-6.83715	3.20995	9.25321	0.2	#DIV/0!	#DIV/0!			3.77063
Tnfsf9 -800bp	L+D p300	36.8267	37.2981	37.0624	0.333312	-7.20108	2.84603	7.1902	0.28	#DIV/0!	#DIV/0!			2.92997
Tnfsf9 -800bp	Control input	30.0314	30.228	30.1297	0.13897
Tnfsf9 -800bp	LPS input	29.4991	29.708	29.6036	0.147693
Tnfsf9 -800bp	L+D input	29.7084	30.0142	29.8613	0.216221
Tnfsf9 -800bp	Control IgG	39.1786	Undetermined	39.1786	#DIV/0!	-10.2776			#DIV/0!			-0.677124	0.625411	0.476469
Tnfsf9 -800bp	LPS IgG	38.4777	Undetermined	38.4777	#DIV/0!	-9.60046			#DIV/0!			0	1	0.76185
Tnfsf9 -800bp	L+D IgG	Undetermined	39.8251	39.8251	#DIV/0!	-10.5785			#DIV/0!			-0.978047	0.507666	0.386765	0.541695
Tnfsf9 -800bp	Control p300	38.0314	38.1866	38.109	0.109763	-9.20804	0.392422	1.31259	0.19	#DIV/0!	#DIV/0!			1
Tnfsf9 -800bp	LPS p300	34.8214	34.6412	34.7313	0.127436	-5.85407	3.74639	13.4207	0.16	#DIV/0!	#DIV/0!			10.2246
Tnfsf9 -800bp	L+D p300	34.116	34.4722	34.2941	0.251843	-5.04754	4.55293	23.4729	0.2	#DIV/0!	#DIV/0!			17.8828
Tnfsf9 -800bp	Control input	28.7241	29.0779	28.901	0.250165
Tnfsf9 -800bp	LPS input	28.7495	29.005	28.8772	0.180674
Tnfsf9 -800bp	L+D input	29.1595	29.3337	29.2466	0.123138
Tnfsf9 -800bp	Control IgG	Undetermined	Undetermined	#DIV/0!	#DIV/0!	#DIV/0!			#DIV/0!			#DIV/0!	#DIV/0!	#DIV/0!
Tnfsf9 -800bp	LPS IgG	Undetermined	Undetermined	#DIV/0!	#DIV/0!	#DIV/0!			#DIV/0!			#DIV/0!	#DIV/0!	#DIV/0!
Tnfsf9 -800bp	L+D IgG	38.8163	39.5629	39.1896	0.527897	-10.0443			0.4			0	1	0.891461	0.891461
Tnfsf9 -800bp	Control p300	39.1807	39.5536	39.3671	0.263646	-9.87858	0.165756	1.12175	0.22	#DIV/0!	#DIV/0!			1
Tnfsf9 -800bp	LPS p300	35.6519	35.4672	35.5595	0.130568	-6.32141	3.72293	13.2042	0.1	#DIV/0!	#DIV/0!			11.7711
Tnfsf9 -800bp	L+D p300	34.2312	34.6999	34.4656	0.331413	-5.32031	4.72403	26.4286	0.28	0.49	4.5			23.56
Tnfsf9 -800bp	Control input	29.3693	29.6078	29.4886	0.168595
Tnfsf9 -800bp	LPS input	29.1936	29.2826	29.2381	0.0629276
Tnfsf9 -800bp	L+D input	28.9898	29.3007	29.1453	0.219822
Trim13 -1kb	Control IgG		39.208	39.208	#DIV/0!	-11.8873			#DIV/0!			-1.43055	0.370989	0.18967
Trim13 -1kb	LPS IgG	38.0849	37.8963	37.9906	0.133413	-10.4567			0.1			0	1	0.511254
Trim13 -1kb	L+D IgG	38.0437	37.2849	37.6643	0.536553	-10.3912			0.44			0.0655184	1.04646	0.535008	0.411977
Trim13 -1kb	Control p300	37.1916	36.4276	36.8096	0.540265	-9.48883	0.967887	1.95597	0.38	#DIV/0!	#DIV/0!			1
Trim13 -1kb	LPS p300	35.6268	34.5391	35.083	0.769123	-7.5491	2.90762	7.50378	0.54	0.55	2.9			3.83634
Trim13 -1kb	L+D p300	33.3917	33.484	33.4378	0.0652824	-6.16467	4.29205	19.59	0.23	0.5	6.8			10.0155
Trim13 -1kb	Control input	27.289	27.3525	27.3208	0.0448712
Trim13 -1kb	LPS input	27.5044	27.5634	27.5339	0.0416842
Trim13 -1kb	L+D input	27.4995	27.0468	27.2731	0.320108
Trim13 -1kb	Control IgG	34.88	34.9159	34.8979	0.0253879	-7.75508			0.09			2.30184	4.93087	1.70764
Trim13 -1kb	LPS IgG	37.5207	36.8935	37.2071	0.443514	-10.0569			0.35			0	1	0.346317
Trim13 -1kb	L+D IgG	36.7223	36.5726	36.6474	0.105814	-9.26162			0.1			0.795299	1.73544	0.601011	0.884991
Trim13 -1kb	Control p300	35.5494	35.7905	35.6699	0.170513	-8.52709	1.52983	2.88753	0.15	0.17	0.3			1
Trim13 -1kb	LPS p300	35.1738	34.9819	35.0778	0.135703	-7.9276	2.12932	4.37511	0.18	0.39	1.2			1.51517
Trim13 -1kb	L+D p300	33.6346	33.4215	33.528	0.150733	-6.14222	3.9147	15.0814	0.13	0.16	1.7			5.22295
Trim13 -1kb	Control input	27.2296	27.0561	27.1429	0.12269
Trim13 -1kb	LPS input	27.2986	27.0018	27.1502	0.209843
Trim13 -1kb	L+D input	27.4539	27.3177	27.3858	0.0963052
Trim13 -1kb	Control IgG	38.4599		38.4599	#DIV/0!	-10.1529			#DIV/0!			-1.26005	0.417529	0.169314
Trim13 -1kb	LPS IgG	36.9462	37.4534	37.1998	0.358611	-8.89288			0.26			0	1	0.405515
Trim13 -1kb	L+D IgG	37.4242	37.068	37.2461	0.251818	-8.85723			0.18			0.0356522	1.02502	0.415661	0.330163
Trim13 -1kb	Control p300	36.1988	35.5966	35.8977	0.425814	-7.59071	1.30217	2.466	0.34	#DIV/0!	#DIV/0!			1
Trim13 -1kb	LPS p300	34.2723	34.2804	34.2763	0.00572388	-5.9694	2.92348	7.58675	0.04	0.26	1.4			3.07654
Trim13 -1kb	L+D p300	34.463	35.7122	35.0876	0.883312	-6.69877	2.19411	4.57608	0.62	0.65	2.1			1.85567
Trim13 -1kb	Control input	28.156	28.4579	28.307	0.213425
Trim13 -1kb	LPS input	28.2658	28.3481	28.3069	0.0582099
Trim13 -1kb	L+D input	28.4092	28.3685	28.3889	0.0287866
Trim13 -1kb	Control IgG	Undetermined	Undetermined	#DIV/0!	#DIV/0!	#DIV/0!			#DIV/0!			#DIV/0!	#DIV/0!	#DIV/0!
Trim13 -1kb	LPS IgG	38.3078	38.6113	38.4595	0.21461	-9.55747			0.23			0	1	0.241672
Trim13 -1kb	L+D IgG	38.1564	38.9967	38.5765	0.594113	-9.31854			0.45			0.238932	1.18012	0.285202	0.263437
Trim13 -1kb	Control p300	35.5309	37.0044	36.2676	1.04193	-7.5086	2.04888	4.13783	0.75	#DIV/0!	#DIV/0!			1
Trim13 -1kb	LPS p300	34.2109	34.4469	34.3289	0.166861	-5.42681	4.13066	17.5167	0.21	0.32	3.9			4.2333
Trim13 -1kb	L+D p300	34.9358	34.6959	34.8159	0.169594	-5.55786	3.99961	15.9957	0.2	0.49	5.4			3.86572
Trim13 -1kb	Control input	28.6429	28.8752	28.759	0.164284
Trim13 -1kb	LPS input	28.7229	29.0812	28.9021	0.253317
Trim13 -1kb	L+D input	29.104	29.412	29.258	0.217822
Trim13 -1kb	Control IgG	39.2319	38.7576	38.9948	0.335395	-10.3784			0.24			-1.11101	0.46297	0.14467
Trim13 -1kb	LPS IgG	Undetermined	37.6527	37.6527	#DIV/0!	-9.26742			#DIV/0!			0	1	0.312482
Trim13 -1kb	L+D IgG	Undetermined	39.4904	39.4904	#DIV/0!	-11.3094			#DIV/0!			-2.04196	0.242834	0.0758812	0.177678
Trim13 -1kb	Control p300	35.9351	36.4761	36.2056	0.382577	-7.58926	1.67816	3.20019	0.27	0.36	0			1
Trim13 -1kb	LPS p300	34.5146	34.9901	34.7523	0.336241	-6.36703	2.90039	7.46627	0.25	#DIV/0!	#DIV/0!			2.33307
Trim13 -1kb	L+D p300	34.6435	33.8849	34.2642	0.536448	-6.08321	3.18421	9.08954	0.4	#DIV/0!	#DIV/0!			2.84032
Trim13 -1kb	Control input	28.642	28.5907	28.6163	0.0363029
Trim13 -1kb	LPS input	28.3046	28.4659	28.3853	0.114055
Trim13 -1kb	L+D input	28.0586	28.3034	28.181	0.173045
Expression of Dex-insensitive genes from RNA-seq (5B- right)
	WT_CO_10_log2(cpm)	WT_CO_74_log2(cpm)	WT_CO_34_log2(cpm)	WT_L60_13_log2(cpm)	WT_L60_77_log2(cpm)	WT_L60_37_log2(cpm)	WT_LD60_14_log2(cpm)	WT_LD60_78_log2(cpm)	WT_LD60_38_log2(cpm)
Cxcl10	2.1	-0.805	0.053	8.44	7.99	7.883	7.622	7.219	7.022
Cd40	3.545	3.193	3.485	5.12	4.701	4.9	5.059	4.371	5.072
Tnfsf9	1.564	1.41	0.837	8.161	8.259	7.72	8.094	8.151	7.477
Trim13	0.683	-0.805	0.263	2.766	2.734	2.174	2.713	2.733	2.11
