# Supplementary material for: Gene-specific mechanisms direct glucocorticoid-receptor-driven repression of inflammatory response genes in macrophages
Source: eLife. 2018 Feb 9;7:e34864. doi: 10.7554/eLife.34864 (PMC5821458; doi:10.7554/eLife.34864)
Supplement: Supplementary file 1. [file elife-34864-supp1.xls]

## Sheet: Sheet1
Supplementary File 1: summary of RNA-seq data for LPS-induced Dex-repressed genes
genes	WT_CO_74_log2(cpm)	WT_CO_34_log2(cpm)	WT_L60_77_log2(cpm)	WT_L60_37_log2(cpm)	WT_LD60_78_log2(cpm)	WT_LD60_38_log2(cpm)	logFC_-1*WT_CO 1*WT_L60	logCPM_-1*WT_CO 1*WT_L60	LR_-1*WT_CO 1*WT_L60	PValue_-1*WT_CO 1*WT_L60	FDR_-1*WT_CO 1*WT_L60	logFC_-1*WT_CO 1*WT_LD60	logCPM_-1*WT_CO 1*WT_LD60	LR_-1*WT_CO 1*WT_LD60	PValue_-1*WT_CO 1*WT_LD60	FDR_-1*WT_CO 1*WT_LD60	logFC_-1*WT_L60 1*WT_LD60	logCPM_-1*WT_L60 1*WT_LD60	LR_-1*WT_L60 1*WT_LD60	PValue_-1*WT_L60 1*WT_LD60	FDR_-1*WT_L60 1*WT_LD60	*foldR basal by Dex
Ifnb1	-5.018	-3.99	4.883	5.933	3.607	4.772	11.137	4.689	474.145	4.01652e-105	5.67283e-102	9.912	4.689	350.43	3.41561e-78	3.50845e-75	-1.225	4.689	26.743	2.32425e-07	6.40528e-05	1.01396
Tmem200b	-5.018	-5.018	0.938	0.969	1.078	-0.19	8.943	0.322	67.048	2.6498e-16	2.77223e-14	8.501	0.322	56.097	6.89736e-14	6.44077e-12	-0.442	0.322	0.939	0.332429	0.999997	0.993092
Il23a	-5.018	-5.018	0.704	-0.237	-1.782	-1.999	8.295	-0.374	39.319	3.59845e-10	2.18596e-08	5.98	-0.374	13.87	0.000195894	0.00456373	-2.315	-0.374	11.538	0.000681874	0.0617461	1
Cxcl10	-0.826	0.035	7.945	7.858	7.177	6.991	8.248	7.34	462.678	1.25632e-102	1.41952e-99	7.434	7.34	395.763	4.60453e-88	7.43238e-85	-0.814	7.34	9.424	0.0021411	0.141475	1.45397
Il6	-2.261	-1.97	5.33	6.122	4.425	5.087	8.094	5.072	580.85	2.45024e-128	5.53705e-125	7.123	5.072	443.62	1.76453e-98	4.98435e-95	-0.971	5.072	23.893	1.01837e-06	0.000234828	1.03526
Areg	-5.018	-3.99	2.222	2.63	0.609	1.731	7.972	1.819	182.375	1.46834e-41	5.02751e-39	6.752	1.819	106.288	6.37758e-25	1.33445e-22	-1.22	1.819	18.977	1.32323e-05	0.00216084	1.03526
Csf3	-3.731	-2.652	3.81	4.892	3.431	4.396	7.887	4.497	464.438	5.20242e-103	6.53136e-100	7.447	4.497	399.386	7.49187e-89	1.41084e-85	-0.441	4.497	5.443	0.0196524	0.760639	1
Ifna5	-5.018	-5.018	-3.399	0.396	-5.018	-0.19	7.813	-0.834	6.743	0.00941412	0.0892367	6.405	-0.834	4.732	0.0295994	0.158129	-1.407	-0.834	0.68	0.40953	0.999997	1
Il1a	-1.372	-0.574	6.619	6.686	5.062	4.688	7.689	5.619	206.86	6.65359e-47	3.41722e-44	5.961	5.619	138.776	4.92935e-32	1.68778e-29	-1.728	5.619	19.638	9.35678e-06	0.0016265	1.07923
Il1b	1.878	2.145	9.432	9.843	7.547	7.747	7.638	8.699	496.205	6.36218e-110	1.1981e-106	5.645	8.699	319.609	1.76219e-71	1.42221e-68	-1.992	8.699	58.039	2.56922e-14	2.07354e-11	1.94531
Cxcl2	2.538	3.196	10.116	10.575	9.716	10.255	7.468	9.87	896.204	6.56144e-197	7.41377e-193	7.11	9.87	836.382	6.64028e-184	7.50285e-180	-0.358	9.87	3.76	0.0524813	0.999997	1.42405
Gem	-1.982	-1.8	5.689	5.005	5.37	4.638	7.362	4.892	344.477	6.75917e-77	5.87476e-74	7.022	4.892	315.492	1.38918e-70	1.04642e-67	-0.34	4.892	1.762	0.184432	0.999997	1
Ptgs2	1.053	1.265	8.31	8.276	6.265	6.182	7.137	7.511	622.119	2.58717e-137	9.74414e-134	5.068	7.511	361.916	1.07717e-80	1.35232e-77	-2.07	7.511	89.873	2.5399e-21	4.78305e-18	1.22264
Flrt3	-5.018	-2.652	2.109	2.568	-0.139	-0.297	6.068	1.198	153.58	2.86162e-35	8.15346e-33	3.474	1.198	32.622	1.11966e-08	6.23204e-07	-2.593	1.198	64.538	9.47068e-16	8.23148e-13	nd
Gm26667	-5.018	-1.97	3.135	3.097	2.265	2.048	6.059	2.393	199.683	2.44866e-45	1.02472e-42	5.104	2.393	131.236	2.19845e-30	6.53692e-28	-0.955	2.393	12.926	0.000323979	0.0323951	nd
Tnf	5.06	6.177	11.508	11.649	10.644	10.368	5.898	10.657	185.129	3.67907e-42	1.29906e-39	4.85	10.657	137.549	9.1481e-32	3.04013e-29	-1.049	10.657	8.777	0.00305072	0.184332	3.81055
Csrnp1	-0.52	2.058	6.272	6.591	5.556	5.776	5.326	5.621	92.608	6.37567e-22	1.02912e-19	4.566	5.621	72.506	1.66564e-17	2.04566e-15	-0.76	5.621	2.796	0.0945254	0.999997	1.07177
Il12b	-1.372	-1.06	4.024	3.437	2.844	2.133	5.049	3.103	46.448	9.40993e-12	6.68697e-10	3.817	3.103	28.745	8.25739e-08	4.11014e-06	-1.232	3.103	4.101	0.0428548	0.999997	1.02101
Ccl4	4.685	5.898	10.176	10.485	9.605	9.957	5.025	9.706	202.227	6.82111e-46	3.08287e-43	4.473	9.706	168.81	1.34609e-38	5.43195e-36	-0.552	9.706	3.436	0.0637709	0.999997	2.73208
Maff	1.842	1.59	6.491	6.666	6.171	6.304	4.873	5.997	324.958	1.2051e-72	9.72605e-70	4.533	5.997	287.882	1.43918e-64	1.01633e-61	-0.341	5.997	2.392	0.121933	0.999997	1.04247
Ccrl2	5.011	4.322	9.645	9.35	9.286	8.881	4.826	8.76	489.375	1.94907e-108	3.14608e-105	4.411	8.76	424.715	2.29664e-94	5.18995e-91	-0.414	8.76	5.044	0.0247136	0.892137	1
Olr1	0.744	-0.574	5.489	4.273	3.599	1.934	4.816	4.177	88.377	5.40884e-21	8.04137e-19	2.747	4.177	32.67	1.09196e-08	6.10794e-07	-2.069	4.177	21.995	2.73296e-06	0.00054175	1.06437
Ppp1r15a	5.627	5.057	9.818	10.376	9.419	9.89	4.749	9.39	204.568	2.10442e-46	9.90745e-44	4.299	9.39	174.953	6.12907e-40	2.5649e-37	-0.45	9.39	2.53	0.11169	0.999997	1.01396
Egr2	1.895	2.961	7.106	7.357	5.923	5.469	4.746	5.944	172.111	2.55916e-39	8.26171e-37	3.257	5.944	90.805	1.58565e-21	2.63474e-19	-1.49	5.944	22.722	1.8723e-06	0.000399152	3.01049
Socs3	4.946	5.088	9.465	9.692	9.115	8.944	4.566	9.107	419.713	2.81852e-93	2.89513e-90	4.01	9.107	340.346	5.36526e-76	5.05184e-73	-0.556	9.107	8.416	0.00372034	0.216681	1.44393
Ccl3	4.69	5.999	9.266	10.099	8.499	9.357	4.311	8.976	268.572	2.32339e-60	1.45844e-57	3.558	8.976	195.857	1.67478e-44	7.88474e-42	-0.754	8.976	10.745	0.00104538	0.0828098	2.58471
Zfp36	6.497	7.105	10.424	11.273	9.863	10.621	4.064	10.287	139.462	3.4901e-32	8.21556e-30	3.45	10.287	106.385	6.07107e-25	1.29428e-22	-0.614	10.287	4.06	0.0439201	0.999997	0.993092
Lif	0.075	-0.211	3.715	4.173	2.246	2.112	4.051	3.277	80.909	2.36377e-19	3.17955e-17	2.298	3.277	27.608	1.48583e-07	7.05393e-06	-1.753	3.277	20.124	7.25672e-06	0.00130149	1.11062
Fosb	-1.982	-1.8	1.661	2.251	0.938	1.026	4.045	1.76	43.3	4.69469e-11	3.12031e-09	2.988	1.76	23.73	1.10851e-06	4.44153e-05	-1.056	1.76	4.465	0.0346023	0.999997	1.08273
Ptgs2os2	-3.062	-2.977	1.241	-0.096	0.224	-1.191	3.993	-0.269	24.994	5.75229e-07	2.31299e-05	2.931	-0.269	12.885	0.000331168	0.00723767	-1.062	-0.269	2.936	0.0866139	0.999997	nd
Lrrc63	-5.018	-2.652	0.839	-0.237	-0.039	-0.474	3.978	-0.342	36.167	1.81102e-09	1.04402e-07	3.357	-0.342	23.695	1.12849e-06	4.50559e-05	-0.621	-0.342	1.896	0.168577	0.999997	1
Ccl2	2.957	3.086	7.116	6.856	6.362	5.804	3.976	6.207	153.562	2.88644e-35	8.15346e-33	3.097	6.207	99.791	1.69324e-23	3.29861e-21	-0.879	6.207	9.637	0.00190715	0.130599	2.18859
Nlrp3	4.677	5.584	9.209	9.061	8.794	8.601	3.943	8.528	137.747	8.2797e-32	1.87105e-29	3.506	8.528	113.231	1.92042e-26	4.71713e-24	-0.436	8.528	2.152	0.142381	0.999997	1.17283
Errfi1	3.281	3.633	7.438	7.283	6.745	6.589	3.894	7.145	303.977	4.48154e-68	3.16481e-65	3.2	7.145	216.371	5.5968e-49	3.01135e-46	-0.694	7.145	12.527	0.000401047	0.0384019	0.463294
Rnd1	1.143	-0.718	4.44	4.077	4.13	3.048	3.86	3.767	35.462	2.60054e-09	1.48401e-07	3.254	3.767	26.554	2.56316e-07	1.18693e-05	-0.606	3.767	1.138	0.28612	0.999997	1.00696
Ccl7	3.098	2.629	6.517	6.976	6.011	6.375	3.843	6.147	146.448	1.03615e-33	2.66078e-31	3.289	6.147	112.136	3.336e-26	8.01988e-24	-0.554	6.147	3.937	0.0472445	0.999997	1.55833
Ch25h	-2.607	-0.107	3.004	2.936	0.913	0.957	3.785	1.799	22.96	1.65388e-06	6.20837e-05	1.74	1.799	5.356	0.0206563	0.135996	-2.045	1.799	8.181	0.00423334	0.240364	1.07923
Nr4a1	3.604	3.536	7.413	7.282	6.648	6.594	3.776	6.808	152.357	5.29372e-35	1.45887e-32	3.054	6.808	105.771	8.27591e-25	1.70017e-22	-0.722	6.808	7.006	0.00812555	0.397448	0.768438
Il27	-3.062	-0.879	2.065	2.15	1.811	1.633	3.769	1.42	60.221	8.47811e-15	7.72533e-13	3.394	1.42	48.33	3.60177e-12	2.86595e-10	-0.375	1.42	0.962	0.326786	0.999997	0.840896
Hspa1a	-2.607	-2.387	1.098	0.834	0.578	-1.191	3.64	1.751	45.385	1.61891e-11	1.11537e-09	2.484	1.751	18.422	1.77027e-05	0.000549512	-1.156	1.751	7.988	0.00470992	0.253956	0.946058
Serpinb2	-1.073	1.68	3.884	4.386	1.926	2.55	3.61	4.081	57.519	3.34687e-14	2.90895e-12	1.686	4.081	13.627	0.000222968	0.00513099	-1.924	4.081	19.765	8.75795e-06	0.00154619	0.972655
Phlda1	1.255	1.495	4.634	5.236	4.059	4.191	3.585	5.202	186.504	1.84267e-42	6.71625e-40	2.773	5.202	114.521	1.00193e-26	2.51574e-24	-0.813	5.202	13.013	0.000309256	0.0314455	1.41421
Irg1	7.827	6.764	11.29	10.395	11.01	9.921	3.541	10.226	148.424	3.83265e-34	1.0071e-31	3.172	10.226	123.078	1.34075e-28	3.60694e-26	-0.37	10.226	1.972	0.160282	0.999997	1.14076
Cxcl3	0.4	1.856	3.862	5.231	3.313	4.681	3.445	4.649	107.146	4.13609e-25	7.78894e-23	2.895	4.649	77.445	1.36483e-18	1.79316e-16	-0.551	4.649	3.653	0.0559844	0.999997	1.07177
Dusp5	3.97	3.231	6.682	6.942	6.172	6.4	3.155	6.396	95.675	1.35351e-22	2.31716e-20	2.628	6.396	69.115	9.28818e-17	1.06007e-14	-0.526	6.396	3.2	0.073647	0.999997	2.11404
Tnfsf15	-1.215	0.817	3.536	2.797	3.111	2.421	3.094	2.779	29.824	4.73104e-08	2.26509e-06	2.687	2.779	22.976	1.63997e-06	6.38967e-05	-0.408	2.779	0.66	0.416506	0.999997	nd
Prdm1	3.864	4.963	7.363	7.68	6.278	6.837	3.065	6.823	114.876	8.37644e-27	1.6901e-24	2.102	6.823	58.076	2.52125e-14	2.52103e-12	-0.963	6.823	13.209	0.000278595	0.0289119	2.20381
Nfkbiz	6.011	8.293	10.095	10.604	9.765	10.292	3.02	10.026	39.335	3.56924e-10	2.17993e-08	2.697	10.026	32.219	1.3772e-08	7.48126e-07	-0.322	10.026	0.531	0.466272	0.999997	1.86607
Nxpe3	-1.215	1.058	2.632	3.64	2.154	2.83	3.016	2.6	61.69	4.02058e-15	3.81752e-13	2.378	2.6	38.468	5.56645e-10	3.76619e-08	-0.638	2.6	3.594	0.0579888	0.999997	nd
Gja1	2.162	3.788	6.095	6.077	5.25	5.165	3.004	5.266	56.695	5.08941e-14	4.25965e-12	2.131	5.266	30.202	3.89305e-08	2.0166e-06	-0.874	5.266	5.656	0.0173988	0.697125	0.965936
Gdf15	4.709	3.818	7.068	7.605	6.258	6.321	3.004	6.482	61.375	4.71874e-15	4.44309e-13	1.943	6.482	27.91	1.27076e-07	6.08402e-06	-1.061	6.482	8.875	0.00289042	0.179444	1.35807
Plat	-2.607	-2.164	0.986	-0.096	-0.039	-1.091	2.992	0.275	33.346	7.71284e-09	4.09143e-07	1.959	0.275	12.098	0.000504824	0.0104278	-1.033	0.275	6.621	0.010081	0.461155	nd
Nr4a3	-2.607	-1.509	0.353	1.225	-1.491	0.003	2.952	0.352	54.162	1.84663e-13	1.4591e-11	1.473	0.352	9.703	0.00183923	0.030561	-1.479	0.352	21.569	3.41375e-06	0.000665034	1.02811
Cish	-1.548	-0.967	2.065	1.295	0.783	0.132	2.933	0.726	66.788	3.02349e-16	3.13417e-14	1.69	0.726	18.559	1.64737e-05	0.000515612	-1.243	0.726	18.259	1.92806e-05	0.00294394	nd
Fam43a	1.143	3.84	4.897	6.334	4.162	5.264	2.929	5.465	36.665	1.40287e-09	8.12872e-08	2.024	5.465	18.488	1.70945e-05	0.000532097	-0.906	5.465	4.057	0.0439758	0.999997	1.18921
Btg2	4.68	5.1	7.423	8.017	6.821	7.575	2.841	7.515	73.972	7.92401e-18	9.13606e-16	2.333	7.515	51.843	6.01359e-13	5.22674e-11	-0.508	7.515	2.716	0.0993638	0.999997	1.5049
Pim1	6.499	6.301	9.091	9.344	8.398	8.363	2.833	8.593	143.677	4.18019e-33	1.02678e-30	1.982	8.593	74.972	4.77342e-18	6.0601e-16	-0.851	8.593	14.739	0.00012347	0.0153306	2.75108
Dusp8	0.782	-0.058	3.35	3	2.206	1.588	2.824	1.965	93.23	4.65456e-22	7.73409e-20	1.55	1.965	26.574	2.53611e-07	1.17924e-05	-1.274	1.965	24.576	7.14258e-07	0.000179342	1.09429
Rab11fip1	4.162	4.239	7.416	6.637	6.783	5.69	2.816	6.428	76.448	2.26063e-18	2.80691e-16	2.053	6.428	42.653	6.53758e-11	4.79663e-09	-0.763	6.428	6.45	0.0110961	0.498279	1.11729
Rasgef1b	6.719	7.561	9.929	10.033	9.136	9.158	2.806	9.377	107.542	3.38716e-25	6.4867e-23	1.974	9.377	56.545	5.49241e-14	5.25921e-12	-0.832	9.377	10.741	0.00104804	0.0828098	3.94493
Irf1	5.499	5.846	8.21	8.635	7.495	7.583	2.752	7.926	205.399	1.38589e-46	6.80834e-44	1.866	7.926	100.259	1.33709e-23	2.65049e-21	-0.886	7.926	24.108	9.1104e-07	0.000216736	2.20381
Tpbg	-2.261	-1.8	1.009	0.261	0.412	-0.91	2.748	-0.003	29.452	5.7307e-08	2.69797e-06	1.925	-0.003	12.995	0.000312401	0.00689419	-0.823	-0.003	4.099	0.0429176	0.999997	0.993092
Tnfsf4	-1.372	-0.644	2.054	1.188	1.714	0.618	2.683	1.143	21.243	4.04606e-06	0.000140666	2.26	1.143	15.065	0.000103886	0.00257415	-0.422	1.143	0.681	0.409333	0.999997	1.04972
Cdc42ep2	2.845	2.552	5.217	5.518	4.68	4.7	2.671	4.672	127.196	1.68344e-29	3.45841e-27	1.991	4.672	72.753	1.46946e-17	1.82456e-15	-0.68	4.672	9.817	0.00172888	0.121333	1.68179
Cd83	5.641	5.96	8.25	8.676	7.104	7.417	2.666	7.546	216.371	5.59664e-49	3.16182e-46	1.46	7.546	69.909	6.20979e-17	7.15964e-15	-1.206	7.546	49.176	2.33954e-12	1.32172e-09	1.6358
Ier3	4.772	4.883	7.117	7.81	5.895	6.252	2.643	6.809	172.922	1.70206e-39	5.65633e-37	1.244	6.809	41.324	1.28976e-10	9.05155e-09	-1.399	6.809	53.615	2.43903e-13	1.72241e-10	5.09824
Xcr1	-1.982	-1.509	0.555	0.88	-0.778	-0.242	2.563	0.081	44.862	2.11382e-11	1.4388e-09	1.315	0.081	8.725	0.00313952	0.0463706	-1.248	0.081	16.427	5.05521e-05	0.00671986	nd
Ifrd1	4.874	4.675	7.301	7.339	6.539	6.659	2.546	6.987	208.553	2.84191e-47	1.52909e-44	1.826	6.987	111.738	4.0787e-26	9.60109e-24	-0.72	6.987	18.955	1.33869e-05	0.00216084	0.939523
Junb	6.759	6.782	8.964	9.564	8.787	8.726	2.53	8.978	78.417	8.34335e-19	1.08358e-16	1.986	8.978	50.369	1.27419e-12	1.05088e-10	-0.544	8.978	4.039	0.0444635	0.999997	2.58471
Myc	3.696	5.031	6.525	7.29	6.18	6.726	2.504	6.274	78.695	7.24909e-19	9.52412e-17	2.051	6.274	54.26	1.75645e-13	1.57509e-11	-0.453	6.274	2.911	0.0880027	0.999997	1.14076
Gpr84	4.997	4.062	7.273	6.831	6.707	5.785	2.502	6.228	71.301	3.06644e-17	3.43046e-15	1.717	6.228	35.383	2.70901e-09	1.63886e-07	-0.784	6.228	7.807	0.00520316	0.274576	1.30134
Dusp4	4.269	3.967	7.284	5.913	6.327	4.491	2.467	5.78	42.445	7.27061e-11	4.69432e-09	1.331	5.78	13.068	0.00030033	0.00667997	-1.136	5.78	9.911	0.00164293	0.11749	1.65491
Ifit1	5.215	5.579	7.715	7.938	7.303	7.622	2.433	7.458	133.138	8.43527e-31	1.7983e-28	2.067	7.458	98.508	3.23768e-23	6.09709e-21	-0.366	7.458	3.375	0.0662038	0.999997	0.922849
Nfkbie	4.816	4.754	7.374	7.059	7.077	6.502	2.43	6.717	141.798	1.07662e-32	2.58824e-30	2.012	6.717	99.608	1.85783e-23	3.55791e-21	-0.418	6.717	4.729	0.0296557	0.994302	1.40444
Klf6	7.302	8.509	10.12	10.617	9.751	10.327	2.417	9.854	73.848	8.4382e-18	9.63063e-16	2.088	9.854	56.504	5.60831e-14	5.32506e-12	-0.329	9.854	1.519	0.217828	0.999997	0.939523
Hspa1b	0.351	-0.265	2.719	2.062	1.975	0.861	2.38	3.257	56.043	7.08856e-14	5.80389e-12	1.433	3.257	19.046	1.27601e-05	0.000407278	-0.947	3.257	11.471	0.000706828	0.0623941	1.16473
Arl5b	2.311	3.463	5.313	5.111	4.876	4.692	2.233	4.797	42.114	8.60916e-11	5.46488e-09	1.804	4.797	28.104	1.14966e-07	5.55128e-06	-0.429	4.797	1.754	0.185343	0.999997	1.00696
Zswim4	4.707	5.223	7.064	7.19	6.652	6.531	2.151	6.587	99.08	2.42548e-23	4.42025e-21	1.623	6.587	57.942	2.69906e-14	2.67515e-12	-0.528	6.587	6.557	0.0104486	0.474132	1.27456
Mx2	2.549	2.265	3.986	5.099	3.275	4.76	2.117	4.198	21.359	3.80847e-06	0.000134056	1.638	4.198	12.987	0.000313727	0.00690995	-0.479	4.198	1.223	0.268698	0.999997	0.860228
Pcdh7	3.764	4.184	6.796	5.581	6.024	4.583	2.112	5.4	26.939	2.09968e-07	8.91889e-06	1.249	5.4	9.777	0.00176685	0.0295717	-0.863	5.4	4.935	0.0263118	0.923283	1.06193
Spata13	3.501	4.336	6.508	5.703	6.247	5.192	2.109	5.665	26.274	2.962e-07	1.23954e-05	1.751	5.665	18.368	1.8206e-05	0.000561992	-0.358	5.665	0.84	0.359391	0.999997	1.01396
Zfp131	3.578	4.342	6.359	5.847	5.751	5.193	2.094	5.652	42.897	5.7712e-11	3.79121e-09	1.466	5.652	21.702	3.18433e-06	0.000117966	-0.628	5.652	4.242	0.0394305	0.999997	0.939523
Cdc42ep4	4.565	4.431	6.723	6.454	6.331	5.559	2.091	6.051	71.199	3.22902e-17	3.57693e-15	1.473	6.051	36.354	1.64506e-09	1.02693e-07	-0.618	6.051	6.772	0.00925871	0.433737	1.27456
Clcf1	1.824	1.411	3.575	3.735	3.27	3.086	2.045	3.316	64.972	7.59874e-16	7.53142e-14	1.569	3.316	38.052	6.88706e-10	4.57746e-08	-0.476	3.316	4.22	0.0399598	0.999997	1.23114
Malt1	3.676	4.315	6.27	5.858	5.577	5.068	2.036	5.54	49.044	2.50229e-12	1.82409e-10	1.3	5.54	20.678	5.43401e-06	0.00019068	-0.735	5.54	6.978	0.00825132	0.399731	1.00696
Mxd1	3.81	4.062	5.531	6.338	4.841	5.079	2.014	5.439	63.733	1.42463e-15	1.36414e-13	1.027	5.439	17.247	3.28138e-05	0.000948242	-0.987	5.439	16.466	4.95362e-05	0.0066632	1.29235
Osm	3.287	3.416	4.921	5.733	4.251	4.763	2.004	4.63	64.302	1.06746e-15	1.03976e-13	1.163	4.63	22.316	2.31226e-06	8.67982e-05	-0.841	4.63	12.407	0.000427819	0.0406213	1.13606
Sde2	4.353	5.149	6.652	6.852	6.257	6.51	1.984	6.226	96.96	7.07296e-23	1.24871e-20	1.614	6.226	65.363	6.22823e-16	6.9676e-14	-0.37	6.226	3.699	0.0544603	0.999997	nd
Gadd45a	3.792	3.014	5.551	5.226	4.048	3.183	1.98	4.719	47.569	5.30892e-12	3.82073e-10	0.221	4.719	0.614	0.433106	0.604746	-1.759	4.719	38.42	5.70496e-10	2.22277e-07	1.48452
Klf7	2.176	4.633	5.541	5.741	4.972	4.976	1.972	5.156	14.05	0.000177985	0.00409583	1.322	5.156	6.469	0.0109759	0.103845	-0.65	5.156	1.687	0.193959	0.999997	1.1487
Zfp558	-1.548	-0.644	0.839	0.926	-0.139	-0.19	1.961	0.415	22.143	2.53031e-06	9.19807e-05	0.893	0.415	3.975	0.0461692	0.193298	-1.069	0.415	8.157	0.0042887	0.240647	nd
Hcar2	2.162	2.102	3.948	4.199	2.883	3.015	1.95	3.213	60.948	5.86005e-15	5.42727e-13	0.824	3.213	10.764	0.0010352	0.0193976	-1.126	3.213	22.567	2.02904e-06	0.000424558	nd
Mefv	5.023	5.345	7.204	7.055	6.849	6.597	1.945	6.577	71.17	3.27714e-17	3.59499e-15	1.544	6.577	45.758	1.3379e-11	1.04255e-09	-0.401	6.577	3.28	0.0701092	0.999997	1.19748
Gadd45b	4.753	5.035	6.5	7.147	6.148	6.46	1.94	6.563	88.609	4.81018e-21	7.2467e-19	1.411	6.563	48.1	4.05126e-12	3.20106e-10	-0.529	6.563	7.145	0.00751636	0.372488	1.39474
Nfkbid	4.581	3.869	6.071	6.3	5.642	5.582	1.94	5.742	64.002	1.24313e-15	1.20052e-13	1.358	5.742	32.29	1.32812e-08	7.24946e-07	-0.582	5.742	6.286	0.0121708	0.535087	2
Traf1	3.661	3.113	5.355	5.319	4.962	4.721	1.928	4.782	28.389	9.92196e-08	4.52049e-06	1.437	4.782	16.183	5.74993e-05	0.00154595	-0.49	4.782	1.992	0.158095	0.999997	1.05702
Peli1	4.346	5.265	6.647	6.757	6.178	6.259	1.868	6.387	64.308	1.06422e-15	1.03976e-13	1.386	6.387	36.186	1.79316e-09	1.11324e-07	-0.483	6.387	4.635	0.0313234	0.999997	nd
Plek	8.755	9.22	10.974	10.75	10.636	10.434	1.859	10.486	74.394	6.39741e-18	7.68982e-16	1.531	10.486	51.487	7.20588e-13	6.16812e-11	-0.327	10.486	2.469	0.116119	0.999997	1.12506
Ripk2	4.136	3.988	6.013	5.79	5.513	5.316	1.84	5.42	107.681	3.15751e-25	6.15116e-23	1.353	5.42	58.993	1.58209e-14	1.59608e-12	-0.487	5.42	8.311	0.0039404	0.226003	1.18099
Fzd1	0.494	2.34	2.753	3.93	2.626	3.438	1.825	3.253	34.51	4.24067e-09	2.36036e-07	1.51	3.253	23.51	1.24268e-06	4.94402e-05	-0.316	3.253	1.175	0.27837	0.999997	1.22194
Frmd6	0.924	3.246	4.138	4.074	2.939	3.275	1.809	3.587	13.706	0.000213764	0.00480183	0.774	3.587	2.622	0.105395	0.281396	-1.035	3.587	4.878	0.0271998	0.948551	1.11808
Adora2b	2.624	2.694	4.418	4.435	4.144	3.883	1.775	4.136	41.917	9.52474e-11	6.01229e-09	1.374	4.136	25.342	4.80086e-07	2.03928e-05	-0.4	4.136	2.355	0.124858	0.999997	1.69349
Tnip3	6.097	6.659	8.122	8.182	7.274	7.41	1.758	7.533	76.915	1.78481e-18	2.24073e-16	0.947	7.533	23.169	1.4839e-06	5.82174e-05	-0.811	7.533	17.228	3.31459e-05	0.00468144	1.26576
Sowahc	5.023	4.756	6.873	6.393	6.5	5.913	1.742	6.667	90.258	2.09044e-21	3.23559e-19	1.317	6.667	52.454	4.40476e-13	3.85809e-11	-0.425	6.667	5.775	0.0162531	0.658223	nd
Kcnj2	4.046	5.079	6.677	6.125	6.248	5.339	1.722	5.807	17.802	2.45122e-05	0.000713822	1.148	5.807	8.029	0.00460434	0.0599398	-0.575	5.807	2.129	0.144572	0.999997	1.51999
Fosl1	0.3	0.559	2.161	2.122	1.742	1.307	1.72	1.525	34.168	5.05531e-09	2.73301e-07	1.116	1.525	13.619	0.000223925	0.00514253	-0.603	1.525	5.145	0.023314	0.858062	0.932675
Isg15	5.313	4.636	6.699	6.698	6.1	6.309	1.685	6.252	35.641	2.37242e-09	1.36071e-07	1.194	6.252	18.249	1.93808e-05	0.000588665	-0.491	6.252	3.214	0.0730001	0.999997	0.916599
Osgin2	3.864	3.818	5.668	5.389	5.046	4.685	1.682	4.951	67.309	2.32138e-16	2.45134e-14	1.019	4.951	25.063	5.54822e-07	2.30476e-05	-0.663	4.951	11.256	0.000793666	0.0664269	1.00696
Skil	7.264	7.811	9.337	9.138	8.94	8.614	1.666	8.756	48.486	3.3258e-12	2.40886e-10	1.21	8.756	26.118	3.21243e-07	1.44611e-05	-0.456	8.756	3.838	0.0501028	0.999997	1.31039
Mdm2	6.411	6.703	8.243	8.08	7.721	7.549	1.605	7.683	70.862	3.83056e-17	4.16168e-15	1.079	7.683	32.779	1.03228e-08	5.83186e-07	-0.526	7.683	8.006	0.00466149	0.253222	1.02101
Htra4	0.4	0.817	2.021	2.26	1.531	1.573	1.568	1.814	12.652	0.000375098	0.00786055	0.989	1.814	4.989	0.0255118	0.148128	-0.579	1.814	1.915	0.166354	0.999997	0.892831
Gpr85	1.478	2.091	3.467	3.303	3.05	2.946	1.556	2.98	36.812	1.30104e-09	7.57753e-08	1.168	2.98	20.554	5.79578e-06	0.000200265	-0.389	2.98	2.605	0.106552	0.999997	0.76313
Tnfaip2	8.926	8.863	10.544	10.351	10.201	9.733	1.552	10.018	75.984	2.85994e-18	3.47468e-16	1.078	10.018	37.45	9.37964e-10	6.12604e-08	-0.474	10.018	7.389	0.00656166	0.332467	1.48452
Pnrc1	5.744	5.521	7.148	7.201	6.553	6.454	1.543	6.651	88.183	5.96683e-21	8.68164e-19	0.87	6.651	28.665	8.60558e-08	4.26467e-06	-0.673	6.651	17.623	2.69347e-05	0.00395241	1.04971
Il1rn	6.214	6.143	7.782	7.643	6.881	6.695	1.538	7.089	36.888	1.25122e-09	7.36329e-08	0.616	7.089	6.128	0.0133067	0.112675	-0.922	7.089	13.672	0.000217712	0.0248016	0.939523
Adamts4	-1.982	-1.267	-0.326	-0.008	-1.491	-0.09	1.527	-0.377	9.702	0.00184064	0.0298812	0.979	-0.377	3.661	0.0556894	0.207737	-0.547	-0.377	1.638	0.200622	0.999997	1.00475
Ccdc71l	5.776	6.106	7.438	7.411	6.706	6.583	1.473	6.965	57.897	2.76268e-14	2.43871e-12	0.694	6.965	13.173	0.000283992	0.00634155	-0.779	6.965	16.805	4.14252e-05	0.00577856	nd
Hilpda	5.491	3.84	6.402	5.952	5.84	5.044	1.453	5.716	21.399	3.72984e-06	0.000132417	0.709	5.716	5.256	0.0218746	0.13916	-0.744	5.716	5.869	0.0154108	0.633186	nd
Stx11	3.778	3.882	5.248	5.264	4.937	4.955	1.433	4.823	42.849	5.91223e-11	3.8614e-09	1.123	4.823	26.482	2.65968e-07	1.22162e-05	-0.31	4.823	2.149	0.14268	0.999997	1.10957
Mmp13	3.573	4.642	5.416	5.669	4.392	4.747	1.427	4.983	34.235	4.88449e-09	2.66617e-07	0.446	4.983	3.409	0.064843	0.222829	-0.981	4.983	16.769	4.22113e-05	0.00581641	1.05702
Plau	5.856	5.387	7.315	6.773	5.548	4.817	1.427	5.796	20.717	5.32449e-06	0.000180665	-0.42	5.796	1.841	0.174838	0.359864	-1.847	5.796	33.843	5.97516e-09	2.02278e-06	nd
B430305J03Rik	1.2	2.091	3.256	3.021	2.939	2.495	1.412	2.83	21.273	3.9836e-06	0.000138922	0.999	2.83	10.566	0.00115169	0.0211199	-0.413	2.83	2.003	0.157002	0.999997	1.11588
4930430E12Rik	3.759	3.385	5.073	4.875	4.418	4.357	1.398	4.423	35.233	2.92489e-09	1.65242e-07	0.808	4.423	11.859	0.000573863	0.0116518	-0.59	4.423	6.649	0.0099235	0.455795	1.40444
Pard3b	-2.607	-0.381	0.118	0.296	-0.488	-0.09	1.391	-0.172	8.312	0.00393811	0.0514413	0.874	-0.172	3.089	0.0788438	0.245686	-0.517	-0.172	1.371	0.241657	0.999997	nd
Il1f9	2.232	0.62	3.81	1.723	3.418	1.361	1.387	2.396	14.399	0.000147884	0.00348114	1.009	2.396	7.601	0.00583346	0.0708734	-0.378	2.396	1.172	0.279019	0.999997	1.14076
Etv3	5.358	6.881	7.308	7.876	6.587	6.826	1.384	6.988	17.983	2.22839e-05	0.000657403	0.506	6.988	2.452	0.117369	0.294243	-0.879	6.988	7.462	0.00630323	0.320812	1.69349
Zfp263	5.972	6.182	7.568	7.334	7.103	6.808	1.358	7.135	46.106	1.12042e-11	7.8631e-10	0.863	7.135	18.917	1.36525e-05	0.000432101	-0.496	7.135	6.378	0.0115565	0.514083	1.18921
Wsb1	5.779	6.735	7.568	7.73	7.234	7.282	1.35	7.261	28.842	7.85167e-08	3.59174e-06	0.962	7.261	14.842	0.000116909	0.00285922	-0.388	7.261	2.483	0.115111	0.999997	1.45645
5930403N24Rik	-1.548	0.59	0.813	1.411	-0.303	1.003	1.345	0.797	11.659	0.000638906	0.0123402	0.619	0.797	2.332	0.126754	0.305456	-0.726	0.797	3.83	0.050346	0.999997	0.998271
Foxn2	4.847	5.991	6.853	6.798	6.268	6.299	1.336	6.408	19.399	1.06062e-05	0.000331965	0.79	6.408	6.923	0.00850847	0.0899319	-0.546	6.408	3.387	0.0657235	0.999997	1.18099
Slc20a1	4.046	4.898	5.681	5.934	5.499	5.253	1.3	5.243	26.16	3.14254e-07	1.30543e-05	0.888	5.243	12.26	0.000462832	0.00972033	-0.412	5.243	2.736	0.0981246	0.999997	1.2994
Rnf19a	4.748	5.607	6.527	6.527	6.274	5.922	1.296	6.253	21.816	3.00157e-06	0.000108354	0.882	6.253	10.185	0.00141622	0.0250791	-0.414	6.253	2.314	0.128187	0.999997	0.812252
Tgif1	6.401	6.406	7.715	7.674	7.209	7.108	1.29	7.347	55.728	8.32381e-14	6.72987e-12	0.754	7.347	19.335	1.09687e-05	0.000356546	-0.537	7.347	9.962	0.00159779	0.11499	2.07053
Vegfa	6.251	6.303	7.432	7.64	6.645	6.711	1.267	7.403	23.81	1.06325e-06	4.11428e-05	0.401	7.403	2.446	0.117862	0.294768	-0.866	7.403	11.33	0.000762595	0.0657753	1.44488
Arhgef3	4.893	4.629	6.497	5.594	5.819	4.718	1.266	5.381	30.263	3.77235e-08	1.8613e-06	0.497	5.381	4.729	0.0296496	0.158187	-0.769	5.381	11.521	0.000688172	0.0617461	1.31207
Tmem171	3.604	3.52	4.717	4.926	4.36	4.459	1.263	4.241	42.295	7.85006e-11	5.03965e-09	0.849	4.241	19.102	1.23931e-05	0.000396686	-0.414	4.241	4.867	0.0273787	0.949462	1.21419
Trib1	4.893	6.118	6.471	7.121	6.007	6.462	1.251	6.643	22.615	1.97949e-06	7.35733e-05	0.69	6.643	6.978	0.00825404	0.0877351	-0.561	6.643	4.695	0.0302512	0.999997	1.24833
Prkaa2	-2.261	-0.322	0.075	0.33	-0.7	-0.19	1.212	-0.226	9.51	0.00204318	0.0321979	0.552	-0.226	1.725	0.189061	0.375431	-0.66	-0.226	3.356	0.0669782	0.999997	nd
Cav1	1.358	1.736	3.192	2.32	2.85	1.798	1.196	2.402	9.285	0.00231025	0.0353706	0.783	2.402	3.963	0.0465238	0.193541	-0.413	2.402	1.189	0.275538	0.999997	1.0052
Bcl6	5.287	5.83	6.597	6.897	6.012	6.411	1.181	6.357	30.841	2.80105e-08	1.40663e-06	0.647	6.357	9.388	0.00218395	0.0348572	-0.534	6.357	6.493	0.0108299	0.489469	1.6245
Spred1	5.67	6.808	7.39	7.546	6.932	7.12	1.179	7.098	19.824	8.49296e-06	0.000275753	0.736	7.098	7.85	0.00508321	0.063959	-0.443	7.098	2.891	0.0890776	0.999997	0.892815
Ralgds	6.425	7.079	7.754	8.105	7.196	7.213	1.172	7.339	34.568	4.11661e-09	2.30265e-07	0.46	7.339	5.417	0.0199433	0.135647	-0.712	7.339	12.999	0.0003117	0.0314455	1.45397
Stk40	5.011	6.344	6.46	7.287	5.807	6.578	1.166	6.428	25.811	3.76511e-07	1.55831e-05	0.484	6.428	4.528	0.0333382	0.166162	-0.681	6.428	9.031	0.00265404	0.167531	1.50525
3110007F17Rik	-1.073	-0.644	0.616	-0.008	0.142	-0.297	1.153	-0.202	9.828	0.00171865	0.028494	0.753	-0.202	3.828	0.0504158	0.199537	-0.4	-0.202	1.512	0.218881	0.999997	nd
Ccr3	1.692	3.446	3.146	4.4	2.255	3.711	1.15	3.754	15.239	9.47426e-05	0.00235274	0.372	3.754	1.589	0.207479	0.394664	-0.778	3.754	7.232	0.00715984	0.35796	1.04972
Btg1	7.455	6.884	8.445	8.199	7.791	7.579	1.142	8.062	32.034	1.51509e-08	7.81691e-07	0.505	8.062	6.375	0.0115736	0.106664	-0.637	8.062	10.177	0.00142177	0.104316	1.17979
Gfod1	0.4	0.393	1.813	1.225	1.359	0.588	1.137	1.015	12.986	0.000313845	0.00679336	0.603	1.015	3.431	0.06398	0.220938	-0.534	1.015	3.275	0.0703327	0.999997	nd
Gas2l3	5.34	6.198	7.104	6.831	6.826	6.388	1.136	6.513	14.386	0.000148941	0.00349145	0.784	6.513	6.907	0.00858392	0.0904218	-0.352	6.513	1.431	0.231596	0.999997	1.2808
Rap2b	6.957	6.556	7.948	7.853	7.351	7.324	1.134	7.539	36.85	1.27589e-09	7.46957e-08	0.571	7.539	9.478	0.00207971	0.0335495	-0.563	7.539	9.308	0.00228208	0.147344	1.31951
Nr4a2	0.666	1.376	2.054	2.337	0.783	1.193	1.133	2.076	11.405	0.000732337	0.0139775	-0.078	2.076	0.05	0.822272	0.892035	-1.211	2.076	13.207	0.00027891	0.0289119	1.16072
Clic4	7.324	8.435	9.005	9.096	8.568	8.746	1.123	8.678	17.648	2.65752e-05	0.000766002	0.726	8.678	7.495	0.0061885	0.0736143	-0.396	8.678	2.272	0.131758	0.999997	0.96602
Irgq	4.629	4.494	5.663	5.699	5.6	5.125	1.122	5.136	33.431	7.38249e-09	3.95331e-07	0.814	5.136	17.669	2.62826e-05	0.000771344	-0.308	5.136	2.62	0.105553	0.999997	1.00696
Orai2	5.23	5.199	6.479	6.198	5.962	5.271	1.122	5.948	27.006	2.02787e-07	8.67911e-06	0.422	5.948	3.847	0.0498355	0.198673	-0.701	5.948	10.752	0.00104168	0.0828098	1.31039
Slc2a6	5.77	4.253	6.486	5.903	6.222	5.281	1.12	5.62	11.681	0.000631302	0.0122562	0.684	5.62	4.433	0.035258	0.171052	-0.436	5.62	1.827	0.176483	0.999997	1.23114
Insig1	6.171	6.719	7.281	7.84	6.947	7.423	1.115	7.478	51.262	8.08276e-13	6.04815e-11	0.739	7.478	22.749	1.84555e-06	7.09281e-05	-0.376	7.478	6.001	0.0142978	0.602802	1.33793
Bmp2	1.842	3.737	3.093	4.777	2.195	3.636	1.111	3.709	6.585	0.010286	0.0924236	0.068	3.709	0.025	0.875131	0.924208	-1.043	3.709	5.844	0.0156287	0.637504	1.63548
Zbtb11	1.962	3.621	4.146	4	3.798	3.676	1.098	3.826	6.659	0.00986334	0.0915332	0.759	3.826	3.212	0.0730916	0.236884	-0.338	3.826	0.668	0.413821	0.999997	nd
Arl5c	6.447	5.669	7.249	7.051	6.454	6.077	1.093	6.47	29.859	4.64522e-08	2.23346e-06	0.202	6.47	1.035	0.309093	0.491616	-0.891	6.47	20.125	7.25278e-06	0.00130149	1.31039
Slc2a1	5.111	5.799	6.498	6.542	6.122	5.907	1.04	6.283	19.694	9.08664e-06	0.000291676	0.544	6.283	5.431	0.0197871	0.135405	-0.496	6.283	4.589	0.0321724	0.999997	1.21263
Ctsc	8.259	9.273	9.738	9.922	8.934	9.239	1.022	9.475	16.372	5.20369e-05	0.00139659	0.277	9.475	1.225	0.268428	0.45406	-0.745	9.475	8.845	0.00293876	0.180462	1.06077
Fkbp14	-0.716	-0.442	0.424	0.427	-0.362	-0.19	1.021	-0.024	8.339	0.00388049	0.050865	0.303	-0.024	0.632	0.426444	0.599079	-0.717	-0.024	4.696	0.0302348	0.999997	nd
Six5	-1.372	-0.211	0.279	0.396	-0.139	-0.474	1.017	0.077	7.277	0.00698471	0.0749995	0.371	0.077	0.85	0.35658	0.536342	-0.646	0.077	3.332	0.0679296	0.999997	nd
Arg2	3.599	3.712	4.52	4.837	3.682	4.133	1.01	4.202	7.543	0.00602516	0.067807	0.227	4.202	0.386	0.534289	0.687421	-0.782	4.202	4.601	0.0319484	0.999997	1.16206
Ahr	1.432	2.673	3.327	3.021	2.579	2.298	1.007	2.921	7.153	0.00748579	0.0777792	0.267	2.921	0.502	0.478563	0.641129	-0.74	2.921	4.012	0.0451805	0.999997	1.35544
Dio2	2.8	1.102	3.602	2.378	2.515	1.463	0.996	2.173	8.451	0.00364915	0.0486797	-0.017	2.173	0.002	0.961395	0.977838	-1.012	2.173	8.81	0.0029965	0.182029	nd
Syngap1	-0.716	0.942	1.161	1.411	0.547	1.112	0.992	1.007	7.165	0.00743364	0.0776272	0.534	1.007	2.007	0.156625	0.340067	-0.458	1.007	1.675	0.195653	0.999997	nd
Zbtb10	0.855	1.393	2.222	2.011	1.359	1.661	0.992	1.7	14.376	0.000149727	0.00350163	0.37	1.7	1.879	0.170466	0.356076	-0.623	1.7	6.185	0.0128851	0.550459	nd
Bcl2l11	6.332	6.876	7.806	7.439	7.325	6.931	0.981	7.55	15.391	8.73926e-05	0.00218462	0.488	7.55	3.851	0.0497107	0.198522	-0.493	7.55	3.983	0.0459739	0.999997	1.32869
Rgs3	2.624	2.058	3.359	3.29	2.564	2.334	0.974	2.759	13.524	0.00023552	0.00524879	0.097	2.759	0.13	0.718405	0.824589	-0.877	2.759	11.271	0.000787451	0.0663985	1.24227
Dhrs9	1.912	1.665	3.197	2.277	2.749	1.934	0.955	2.281	16.714	4.34684e-05	0.00120086	0.554	2.281	5.437	0.0197144	0.135166	-0.402	2.281	3.249	0.0714776	0.999997	1.00845
Ldlr	5.788	7.263	7.024	8.01	6.627	7.524	0.949	7.446	9.903	0.0016504	0.0275042	0.505	7.446	2.83	0.0925341	0.266245	-0.445	7.446	2.209	0.137205	0.999997	1.41759
Ets1	2.997	4.627	4.029	5.52	3.634	4.981	0.948	4.592	17.221	3.32736e-05	0.00094462	0.475	4.592	4.31	0.0378918	0.176391	-0.473	4.592	4.437	0.0351682	0.999997	1.18921
Fbxo30	3.764	4.294	5.238	4.709	4.806	4.515	0.933	4.847	13.117	0.000292608	0.00639492	0.605	4.847	5.56	0.018376	0.13075	-0.328	4.847	1.681	0.194805	0.999997	1.03218
A830010M20Rik	-0.347	0.428	1.032	1.053	0.64	0.703	0.927	0.81	6.899	0.00862426	0.0846734	0.551	0.81	2.327	0.127128	0.305705	-0.376	0.81	1.276	0.2587	0.999997	nd
Pdgfb	4.218	4.196	5.167	5.089	3.914	3.625	0.925	4.374	12.699	0.000365765	0.00772481	-0.424	4.374	2.635	0.104546	0.28052	-1.349	4.374	26.483	2.65905e-07	7.15347e-05	2.47384
Spty2d1	4.781	5.41	6.032	6.05	5.656	5.683	0.916	5.877	16.678	4.43009e-05	0.0012179	0.544	5.877	5.925	0.0149292	0.118544	-0.372	5.877	2.816	0.0933526	0.999997	1.26553
Mapkapk2	8.343	8.275	9.208	9.238	8.84	8.83	0.914	8.928	34.726	3.79562e-09	2.13367e-07	0.526	8.928	11.608	0.000656538	0.0129689	-0.388	8.928	6.36	0.0116693	0.517064	1.12506
Src	3.029	3.471	3.966	4.222	3.503	3.69	0.86	3.666	6.836	0.00893276	0.0863627	0.366	3.666	1.243	0.264925	0.450723	-0.493	3.666	2.305	0.128936	0.999997	1.04369
Odc1	6.31	5.826	6.842	7.046	6.157	6.384	0.85	6.778	14.025	0.0001804	0.00414296	0.177	6.778	0.613	0.43383	0.605353	-0.673	6.778	8.908	0.00283888	0.177218	1.25926
Sh2b2	5.159	5.149	6.002	5.944	5.779	5.115	0.818	5.704	15.93	6.57348e-05	0.0017193	0.309	5.704	2.269	0.131982	0.311297	-0.509	5.704	6.251	0.0124137	0.539471	1.47738
B4galt5	6.602	7.11	7.551	7.823	7.092	7.005	0.817	7.405	14.008	0.000182059	0.00415573	0.177	7.405	0.66	0.416479	0.590328	-0.641	7.405	8.653	0.00326533	0.195211	1.6358
Ier5	5.62	5.717	6.367	6.6	5.772	5.72	0.817	6.581	19.654	9.28005e-06	0.000295367	0.079	6.581	0.184	0.668101	0.788476	-0.739	6.581	16.144	5.87125e-05	0.0076252	2.37841
Padi2	0.448	0.966	1.69	1.442	1.448	0.81	0.816	1.113	7.496	0.00618426	0.0690162	0.397	1.113	1.685	0.194314	0.381503	-0.419	1.113	2.166	0.141114	0.999997	0.976292
Ppap2b	3.029	2.723	4.322	3.026	3.682	2.438	0.813	3.23	7.629	0.00574527	0.0658375	0.194	3.23	0.432	0.510978	0.667848	-0.619	3.23	4.552	0.0328734	0.999997	1.19513
Kdr	0.625	0.495	1.718	0.926	1.265	0.618	0.788	1.168	7.38	0.0065939	0.0720546	0.394	1.168	1.737	0.187485	0.374467	-0.394	1.168	2.068	0.150448	0.999997	nd
Arrdc4	4.959	4.53	5.746	5.311	5.405	4.814	0.785	5.38	16.065	6.11994e-05	0.00160812	0.372	5.38	3.603	0.0576833	0.210995	-0.413	5.38	4.547	0.0329706	0.999997	1.13234
Zbtb21	4.374	4.398	5.291	5.049	4.936	4.76	0.784	4.802	21.217	4.10106e-06	0.000142141	0.461	4.802	7.294	0.00691666	0.0789408	-0.324	4.802	3.735	0.053287	0.999997	nd
Abhd17c	5.767	5.683	6.65	6.356	6.205	5.863	0.776	6.051	18.818	1.43813e-05	0.00044519	0.307	6.051	2.956	0.0855564	0.255741	-0.469	6.051	6.975	0.00826725	0.399731	nd
Slc25a37	5.503	5.542	6.651	5.952	6.316	5.554	0.772	6.146	11.3	0.000774876	0.0147148	0.409	6.146	3.193	0.0739586	0.238419	-0.362	6.146	2.541	0.110954	0.999997	1.09231
Clec5a	5.393	4.094	6.216	4.78	5.851	4.463	0.763	5.349	8.678	0.00322026	0.0446999	0.419	5.349	2.629	0.104952	0.281007	-0.344	5.349	1.792	0.180727	0.999997	1.06756
Ifit2	5.198	6.313	6.322	6.75	5.842	6.585	0.757	6.464	6.465	0.0109993	0.095016	0.434	6.464	2.15	0.142559	0.323947	-0.322	6.464	1.192	0.275004	0.999997	0.828975
Ednrb	4.921	6.36	6.192	6.713	5.67	6.208	0.744	6.128	6.578	0.0103267	0.0924236	0.231	6.128	0.637	0.424842	0.597585	-0.513	6.128	3.179	0.0745994	0.999997	1.07543
Sqstm1	10.136	9.293	10.585	10.291	10.086	9.58	0.705	10.167	11.093	0.000866751	0.0160812	0.102	10.167	0.233	0.629296	0.75966	-0.604	10.167	8.168	0.0042632	0.240647	1.24833
Ptpre	6.067	6.628	7.219	6.935	6.716	6.371	0.702	6.755	8.757	0.0030847	0.0434588	0.17	6.755	0.519	0.471452	0.635673	-0.531	6.755	5.086	0.0241253	0.885037	1.36528
Acsl1	5.584	6.005	6.704	6.326	6.378	5.976	0.696	6.368	9.051	0.00262534	0.0386247	0.359	6.368	2.418	0.119954	0.297089	-0.337	6.368	2.159	0.141777	0.999997	0.957361
Hpn	2.898	3.532	3.197	4.571	2.908	4.117	0.693	3.515	7.231	0.00716718	0.076173	0.31	3.515	1.437	0.230696	0.419233	-0.383	3.515	2.294	0.129863	0.999997	1.40444
Mir22hg	2.482	3.811	3.694	4.107	3.261	3.801	0.691	3.699	6.757	0.00933913	0.0888988	0.32	3.699	1.443	0.229651	0.418543	-0.371	3.699	2.005	0.15675	0.999997	nd
Brd2	7.486	7.893	8.417	8.355	8.098	7.998	0.685	8.466	13.395	0.000252335	0.00557951	0.347	8.466	3.454	0.0631135	0.219286	-0.338	8.466	3.299	0.0693348	0.999997	1.23971
Lrrc8d	6.344	6.666	7.407	6.965	7.132	6.573	0.65	7.023	7.443	0.00636888	0.0702754	0.321	7.023	1.817	0.177694	0.362675	-0.329	7.023	1.937	0.163989	0.999997	1.0647
Nck1	4.755	4.597	5.54	5.093	5.202	4.788	0.645	5.004	12.249	0.000465441	0.00940791	0.322	5.004	3.051	0.0806965	0.24858	-0.323	5.004	3.131	0.076817	0.999997	0.978726
Il17ra	6.301	5.797	6.839	6.478	6.436	5.946	0.605	6.488	8.071	0.00449862	0.0561656	0.142	6.488	0.444	0.505078	0.66305	-0.464	6.488	4.762	0.0290996	0.987136	1.22264
	*foldR basal by Dex
	RNA-seq data from PMID: 25099603 (https://www.ncbi.nlm.nih.gov/pubmed/25099603)
