# Supplementary material for: Gene-specific mechanisms direct glucocorticoid-receptor-driven repression of inflammatory response genes in macrophages
Source: eLife. 2018 Feb 9;7:e34864. doi: 10.7554/eLife.34864 (PMC5821458; doi:10.7554/eLife.34864)
Supplement: Supplementary file 2. [file elife-34864-supp2.xls]

## Sheet: MAria Chipseq quality metrics
Supplementary File 2: summary of ChIP-seq experiments
ID	Factor	Replicate	Reads	Peaks	Pass MapQ Filter%	Dup%	ReadL	FragL	RSC	NSC	RiP%	RiBL%	FDRq	N pooled experiments
BRD4_L_rep1	BRD4	1	3340300	12328	100	0	51	175	2.36	1.9	3.2	0.32	0.05	8
BRD4_L_rep2	BRD4	2	3723935	6924	91	0	51	160	2.665	1.742	1.7	0.68	0.05	8
BRD4_LD_rep1	BRD4	1	3290166	11845	100	0	51	178	2.4	2.1	3.9	0.29	0.05	8
BRD4_LD_rep2	BRD4	2	3390004	4978	90	0	51	142	2.974	1.703	0.55	0.75	0.05	8
BRD4_U_rep1	BRD4	1	3249236	8389	100	0	51	163	2.76	2.24	2.3	0.3	0.05	8
BRD4_U_rep2	BRD4	2	3685080	6924	90	0	51	142	2.955	1.81	0.65	0.74	0.05	8
GR_D_rep1	GR	1	6219988	2922	100	0	51	267	1.617	1.337	1	0.55	0.01	6
GR_D_rep2	GR	2	2814984	2526	100	0	51	172	1.72	1.899	1.2	0.53	0.01	8
GR_L_rep1	GR	1	5861427	344	100	0	51	267	1.639	1.19	0.12	0.53	0.01	6
GR_L_rep2	GR	2	2648221	290	100	0	51	175	1.646	1.385	0.07	0.58	0.01	8
GR_LD_rep1	GR	1	5870854	7019	100	0	51	264	1.619	1.45	2.7	0.51	0.01	6
GR_LD_rep2	GR	2	3669465	8644	100	0	51	173	1.46	1.86	3.4	0.46	0.01	8
GR_U_rep1	GR	1	6221929	310	100	0	51	266	1.689	1.193	0.1	0.55	0.01	6
GR_U_rep32	GR	2	3065535	267	100	0	51	160	1.84	1.497	0.14	0.58	0.01	8
Nelf1_LPS0h	NELF	1	2612013	14247	90	0	49	194	1.45	1.73	2.5	0.86	0.00001**	3
Nelf1_LPS1h	NELF	1	2605162	###	90	0	49	185	0.76	1.15	0.59	0.84	###	3
Nelf1_LPS3h	NELF	1	2876635	###	90	0	49	192	0.94	1.2	0.77	0.86	###	3
Nelf3_LD_1h	NELF	1	2257041	8527	90	0	49	218	0.829	1.29	1.3	0.85	0.00001**	2
p65_L_rep1	p65	1	3546168	4036	90	0	51	170	2.808	1.62	0.48	0.78	0.01	4
p65_L_rep2	p65	2	4770660	5998	90	0	51	184	1.518	1.277	0.78	0.71	0.01	5
p65_LD_rep1	p65	1	3546954	3611	90	0	51	168	3.12	1.786	0.46	0.77	0.01	4
p65_LD_rep2	p65	2	3847697	6124	90	0	51	163	1.954	1.455	0.83	0.7	0.01	5
p65_U_rep1	p65	1	2912231	1077	90	0	51	162	2.95	1.85	0.07	0.78	0.0001**	4
p65_U_rep2	p65	2	4244378	2919	90	0	51	170	1.671	1.325	0.28	0.73	0.01	5
Pol2_L_Rep1	POL2	1	6073410	9007##	99	0	51	168	1.773	1.333	19#	0.29	NA	3
Pol2_L_Rep2	POL2	2	3317629	9007##	89	0	51	177	2	1.5	22#	0.89	NA	4
Pol2_LD_Rep1	POL2	1	5498731	9007##	99	0	51	172	2.33	1.4	18#	0.3	NA	3
Pol2_LD_Rep2	POL2	2	3107733	9007##	89	0	51	142	2.7	1.7	21#	0.85	NA	4
Pol2_U_Rep1	POL2	1	6148374	9007##	99	0	51	170	1.8	1.312	19#	0.3	NA	3
Pol2_U_Rep2	POL2	2	3334296	9007##	89	0	51	177	2.34	1.57	21#	0.85	NA	4
GR_input	NA	NA	5342425		100	0	51	193	1.31	1.14	NA	0.53	NA
p65_input	NA	NA	3386353		88	0	51	173	1.31	1.14	NA	0.94	NA
Pol2_input	NA	NA	4179550		88	0	51	171	1.39	1.17	NA	0.91	NA
BRD4_input	NA	NA	3386353		88	0	51	173	1.9	1.3	NA	0.94	NA
ID - Unique sample ID.
Tissue/Factor/Condition - Metadata associated to sample.
Replicate - Number of replicate within sample group
Reads - Number of sample reads within analysed chromosomes.
Dup% - Percentage of MapQ filter passing reads marked as duplicates
FragLen - Estimated fragment length by cross-coverage method
RSC - Relative Strand Corelation (the ratio between the fragment-length peak and the read-length peak in the cross-correlation plot)
NSC - Normalized strand coefficient(the ratio between the fragment-length peak and the background cross-correlation values)
RIP% - Percentage of reads wthin peaks
RIBL% - Percentage of reads wthin Blacklist regions
# - RIP% for RNA Polymerase was calculated for all expressed genes as defined by RNAseq
## - peaks for RNA polymerase we defined as expressed genes based on RNASeq experiment
### - no separate peak calling was performed for LPS-treated NELF ChIPseq experiments. Peak coordinates defined for NELF in untreated MF were
used to determine read density in peaks in LPS-treated MF.
** - unadjusted p values

## Sheet: Sheet1
Supplementary Table . Summary of ChIP-seq experiments
ID	Factor	Replicate	Reads	Peaks	Pass MapQ Filter%	Dup%	ReadL	FragL	RSC	NSC	RiP%	RiBL%	ID	FDRq			RelCC	SSD
BRD4_L_rep1	BRD4	1	3340300	12328	100	0	51	175	2.36	1.9	3.2	0.32	BRD4_L_rep1	0.05			10	0.99
BRD4_L_rep2	BRD4	2	3723935	6924	91	0	51	160	2.665	1.742	1.7	0.68	BRD4_L_rep2	0.05			13	0.93
BRD4_LD_rep1	BRD4	1	3290166	11845	100	0	51	178	2.4	2.1	3.9	0.29	BRD4_LD_rep1	0.05			8	1
BRD4_LD_rep2	BRD4	2	3390004	4978	90	0	51	142	2.974	1.703	0.55	0.75	BRD4_LD_rep2	0.05			11	0.83
BRD4_U_rep1	BRD4	1	3249236	8389	100	0	51	163	2.76	2.24	2.3	0.3	BRD4_U_rep1	0.05			12	1.1
BRD4_U_rep2	BRD4	2	3685080	6924	90	0	51	142	2.955	1.81	0.65	0.74	BRD4_U_rep2	0.05			9.2	0.92
GR_D_rep1	GR	1	6219988	2922	100	0	51	267	1.617	1.337	1	0.55	GR_D_rep1	0.01			3	0.77
GR_D_rep3	GR	2	2814984	2526	100	0	51	172	1.72	1.899	1.2	0.53	GR_D_rep3	0.01			5.1	0.82
GR_L_rep1	GR	1	5861427	344	100	0	51	267	1.639	1.19	0.12	0.53	GR_L_rep1	0.01			4.7	0.71
GR_L_rep3	GR	2	2648221	290	100	0	51	175	1.646	1.385	0.067	0.58	GR_L_rep3	0.01			4	0.64
GR_LD_rep1	GR	1	5870854	7019	100	0	51	264	1.619	1.45	2.7	0.51	GR_LD_rep1	0.01			4.2	1
GR_LD_rep3	GR	2	3669465	8644	100	0	51	173	1.46	1.86	3.4	0.46	GR_LD_rep3	0.01			3.9	0.93
GR_U_rep1	GR	1	6221929	310	100	0	51	266	1.689	1.193	0.1	0.55	GR_U_rep1	0.01			3.4	0.72
GR_U_rep3	GR	2	3065535	267	100	0	51	160	1.84	1.497	0.14	0.58	GR_U_rep3	0.01			-9	0.97
Nelf1_LPS0h	NELF	1	2612013	14247	90	0	49	194	1.45	1.73	2.5	0.86	Nelf1_LPS0h	0.00001**			5.4	0.69
Nelf1_LPS1h	NELF	1	2605162		90	0	49	185	0.76	1.15	0.59	0.84	Nelf1_LPS1h	##			1.5	0.59
Nelf1_LPS3h	NELF	1	2876635		90	0	49	192	0.94	1.2	0.77	0.86	Nelf1_LPS3h	##			1.8	0.61
Nelf3_LD_1h	NELF	1	2257041	8527	90	0	49	218	0.829	1.29	1.3	0.85	Nelf3_LD_1h	0.00001**			1.5	0.68
p65_L_rep1	p65	1	3546168	4036	90	0	51	170	2.808	1.62	0.48	0.78	p65_L_rep1	0.01			12	0.8
p65_L_rep2	p65	2	4770660	5998	90	0	51	184	1.518	1.277	0.78	0.71	p65_L_rep2	0.01			3.3	0.7
p65_LD_rep1	p65	1	3546954	3611	90	0	51	168	3.12	1.786	0.46	0.77	p65_LD_rep1	0.01			15	0.87
p65_LD_rep2	p65	2	3847697	6124	90	0	51	163	1.954	1.455	0.83	0.7	p65_LD_rep2	0.01			4.9	0.72
p65_U_rep1	p65	1	2912231		90	0	51	162	2.95	1.85	0.0023	0.78	p65_U_rep1	0.0001**			9.6	0.89
p65_U_rep2	p65	2	4244378	2919	90	0	51	170	1.671	1.325	0.28	0.73	p65_U_rep2	0.01			3.7	0.7
Pol2_L_Rep1	POL2	1	6073410	9007##	99	0	51	168	1.773	1.333	19#	0.29	Pol2_L_Rep1	NA			5.4	0.75
Pol2_L_Rep2	POL2	2	3317629	9007##	89	0	51	177	2	1.5	22#	0.89	Pol2_L_Rep2	NA			5.9	0.81
Pol2_LD_Rep1	POL2	1	5498731	9007##	99	0	51	172	2.33	1.4	18#	0.3	Pol2_LD_Rep1	NA			5.6	0.83
Pol2_LD_Rep2	POL2	2	3107733	9007##	89	0	51	142	2.7	1.7	21#	0.85	Pol2_LD_Rep2	NA			16	0.83
Pol2_U_Rep1	POL2	1	6148374	9007##	99	0	51	170	1.8	1.312	19#	0.3	Pol2_U_Rep1	NA			4.2	0.73
Pol2_U_Rep2	POL2	2	3334296	9007##	89	0	51	177	2.34	1.57	21#	0.85	Pol2_U_Rep2	NA			10	0.77
GR_input	NA	NA	5342425		100	0	51	193	1.31	1.14	NA	0.53	GR_input	NA			1.8	0.67
p65_input	NA	NA	3386353		88	0	51	173	1.31	1.14	NA	0.94	p65_input	NA			20	0.81
Pol2_input	NA	NA	4179550		88	0	51	171	1.39	1.17	NA	0.91	Pol2_input	NA			15	0.66
BRD4_input	NA	NA	3386353		88	0	51	173	1.9	1.3	NA	0.94	BRD4_input	NA			20	0.81
A short description of Table 1 metrics is provided below:
ID - Unique sample ID.
Tissue/Factor/Condition - Metadata associated to sample.
Replicate - Number of replicate within sample group
Reads - Number of sample reads within analysed chromosomes.
Dup% - Percentage of MapQ filter passing reads marked as duplicates
FragLen - Estimated fragment length by cross-coverage method
SSD - SSD score (htSeqTools)
FragLenCC - Cross-Coverage score at the fragment length
RelativeCC - Cross-coverage score at the fragment length over Cross-coverage at the read length
RIP% - Percentage of reads wthin peaks
RIBL% - Percentage of reads wthin Blacklist regions
RIP% for RNA Polymerase was calculated for all expressed genes as defined by RNAseq
