# Supplementary figures and images for: Gene-specific mechanisms direct glucocorticoid-receptor-driven repression of inflammatory response genes in macrophages
Source: eLife journal article supplement (doi:10.7554/elife.34864), 2018-02-09

Figure 1 – Figure Supplement 2

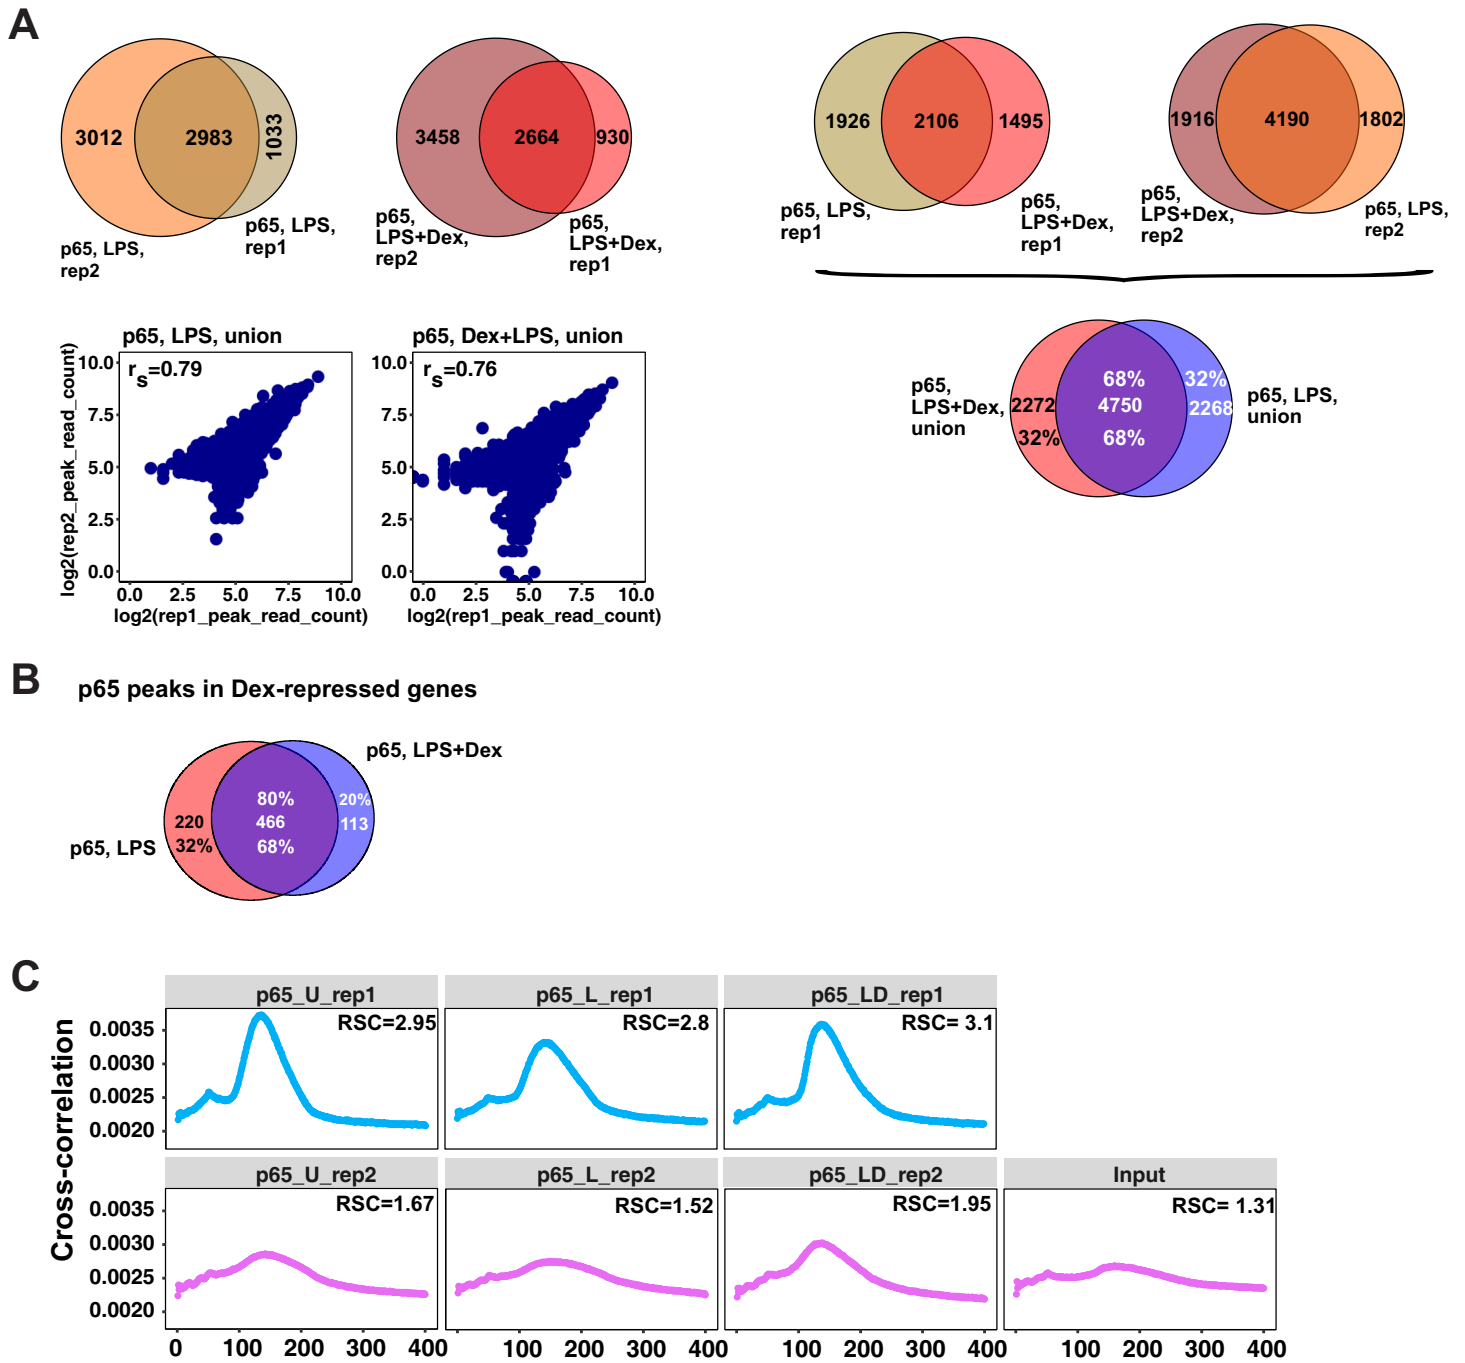

Supplement: supp [file elife-34864-supp-v1.zip]

Figure 3 - Figure Supplement 1

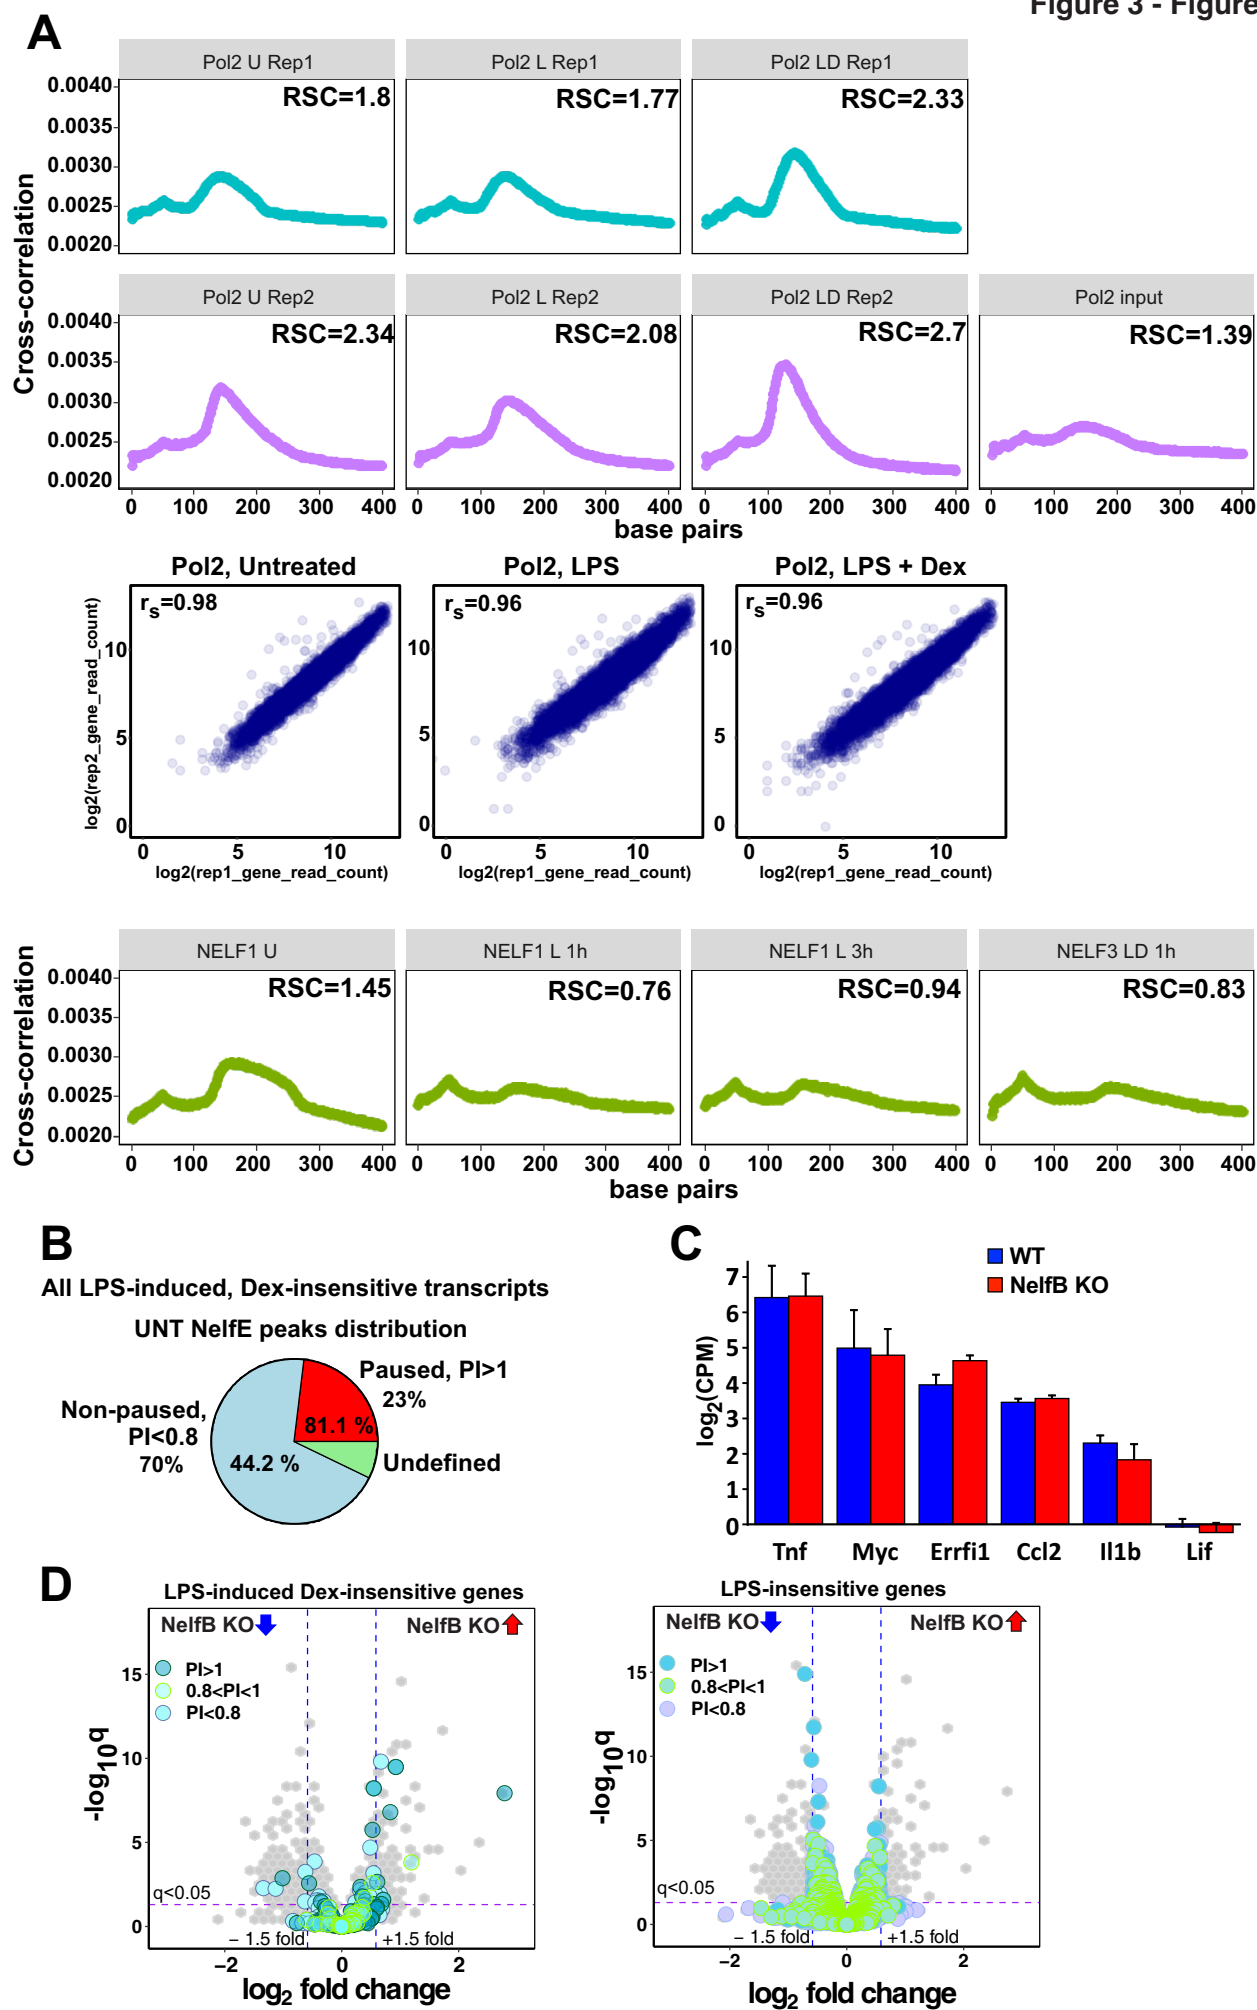

Supplement: supp [file elife-34864-supp-v1.zip]

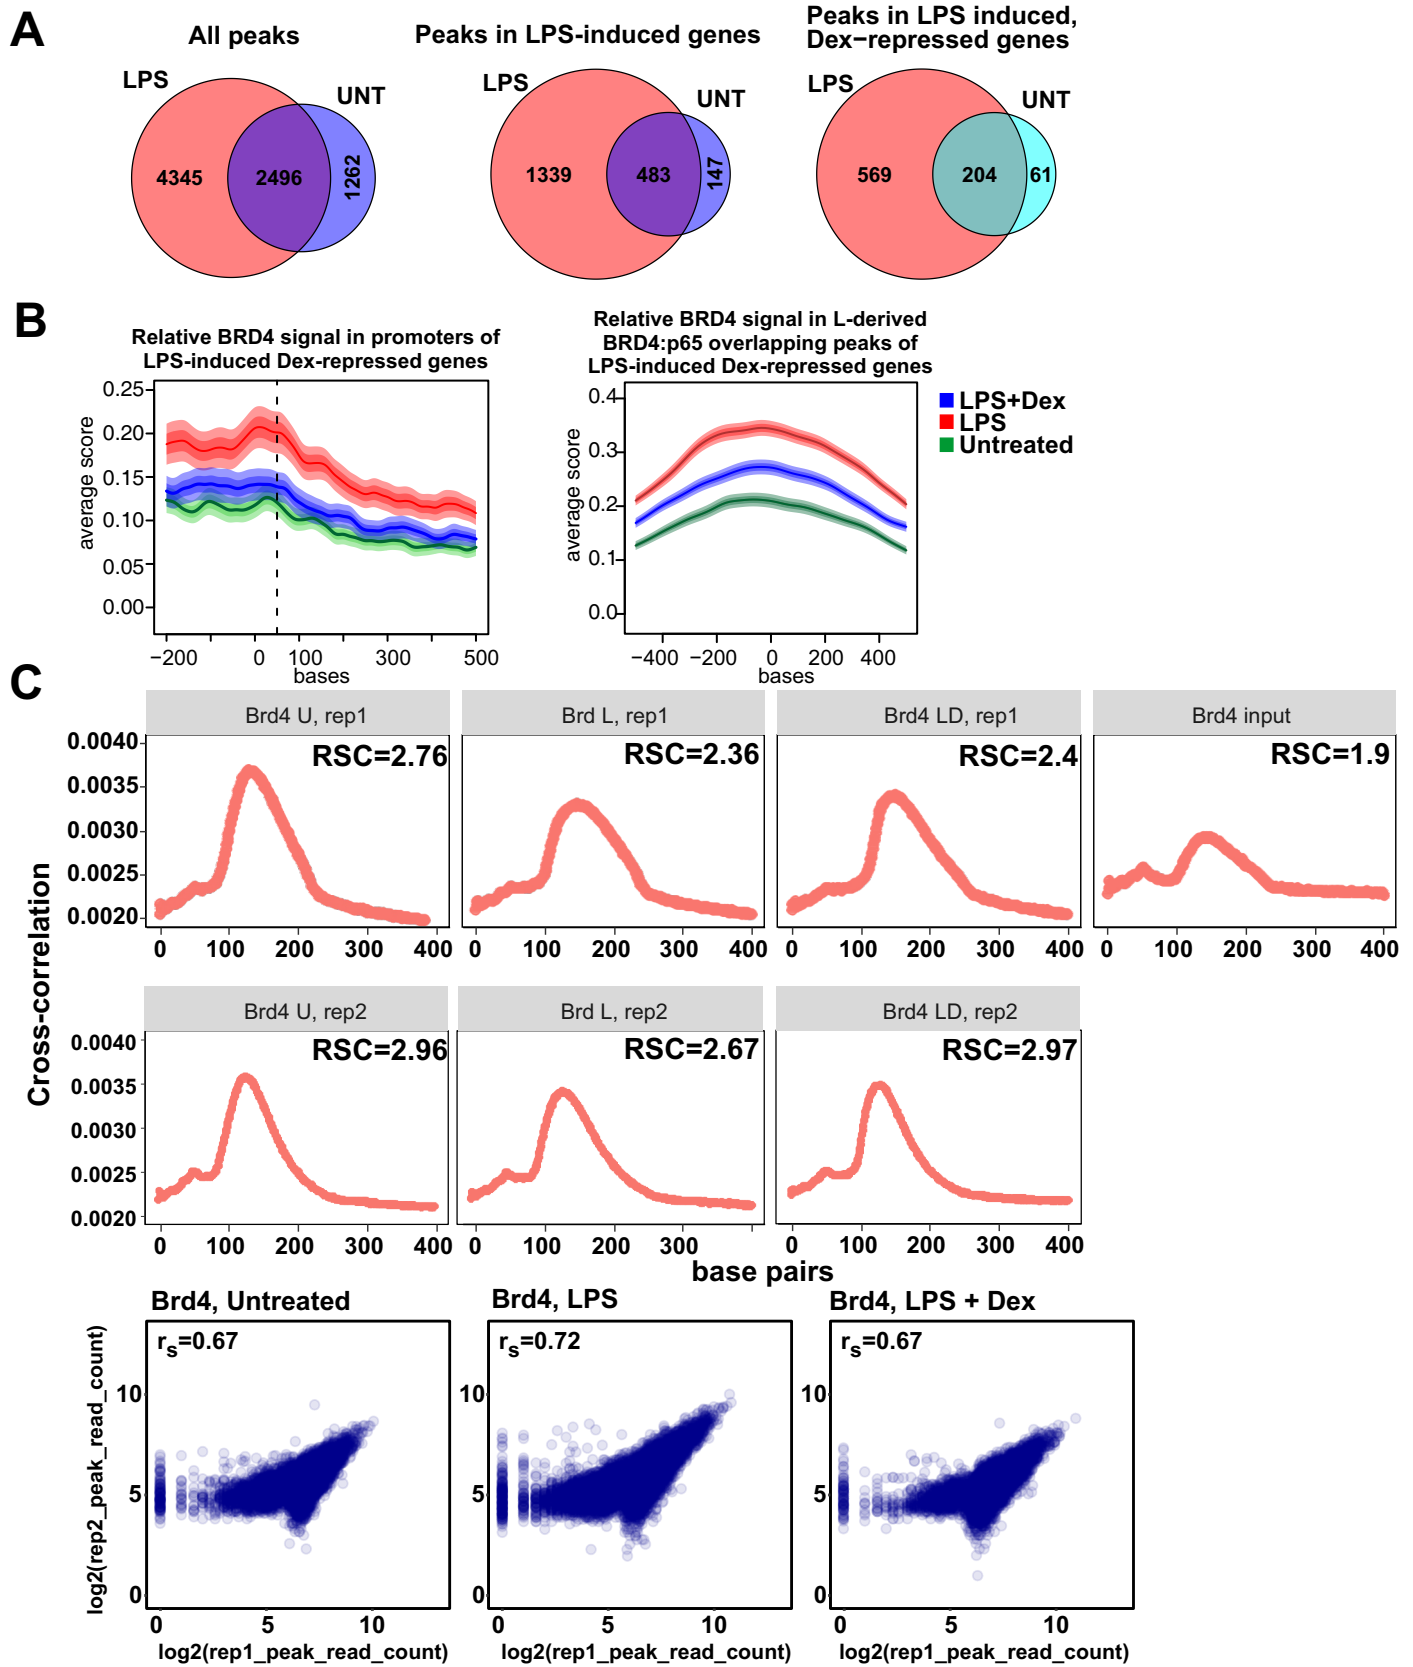

Supplement: supp [file elife-34864-supp-v1.zip]

Figure 1 – Figure Supplement 1

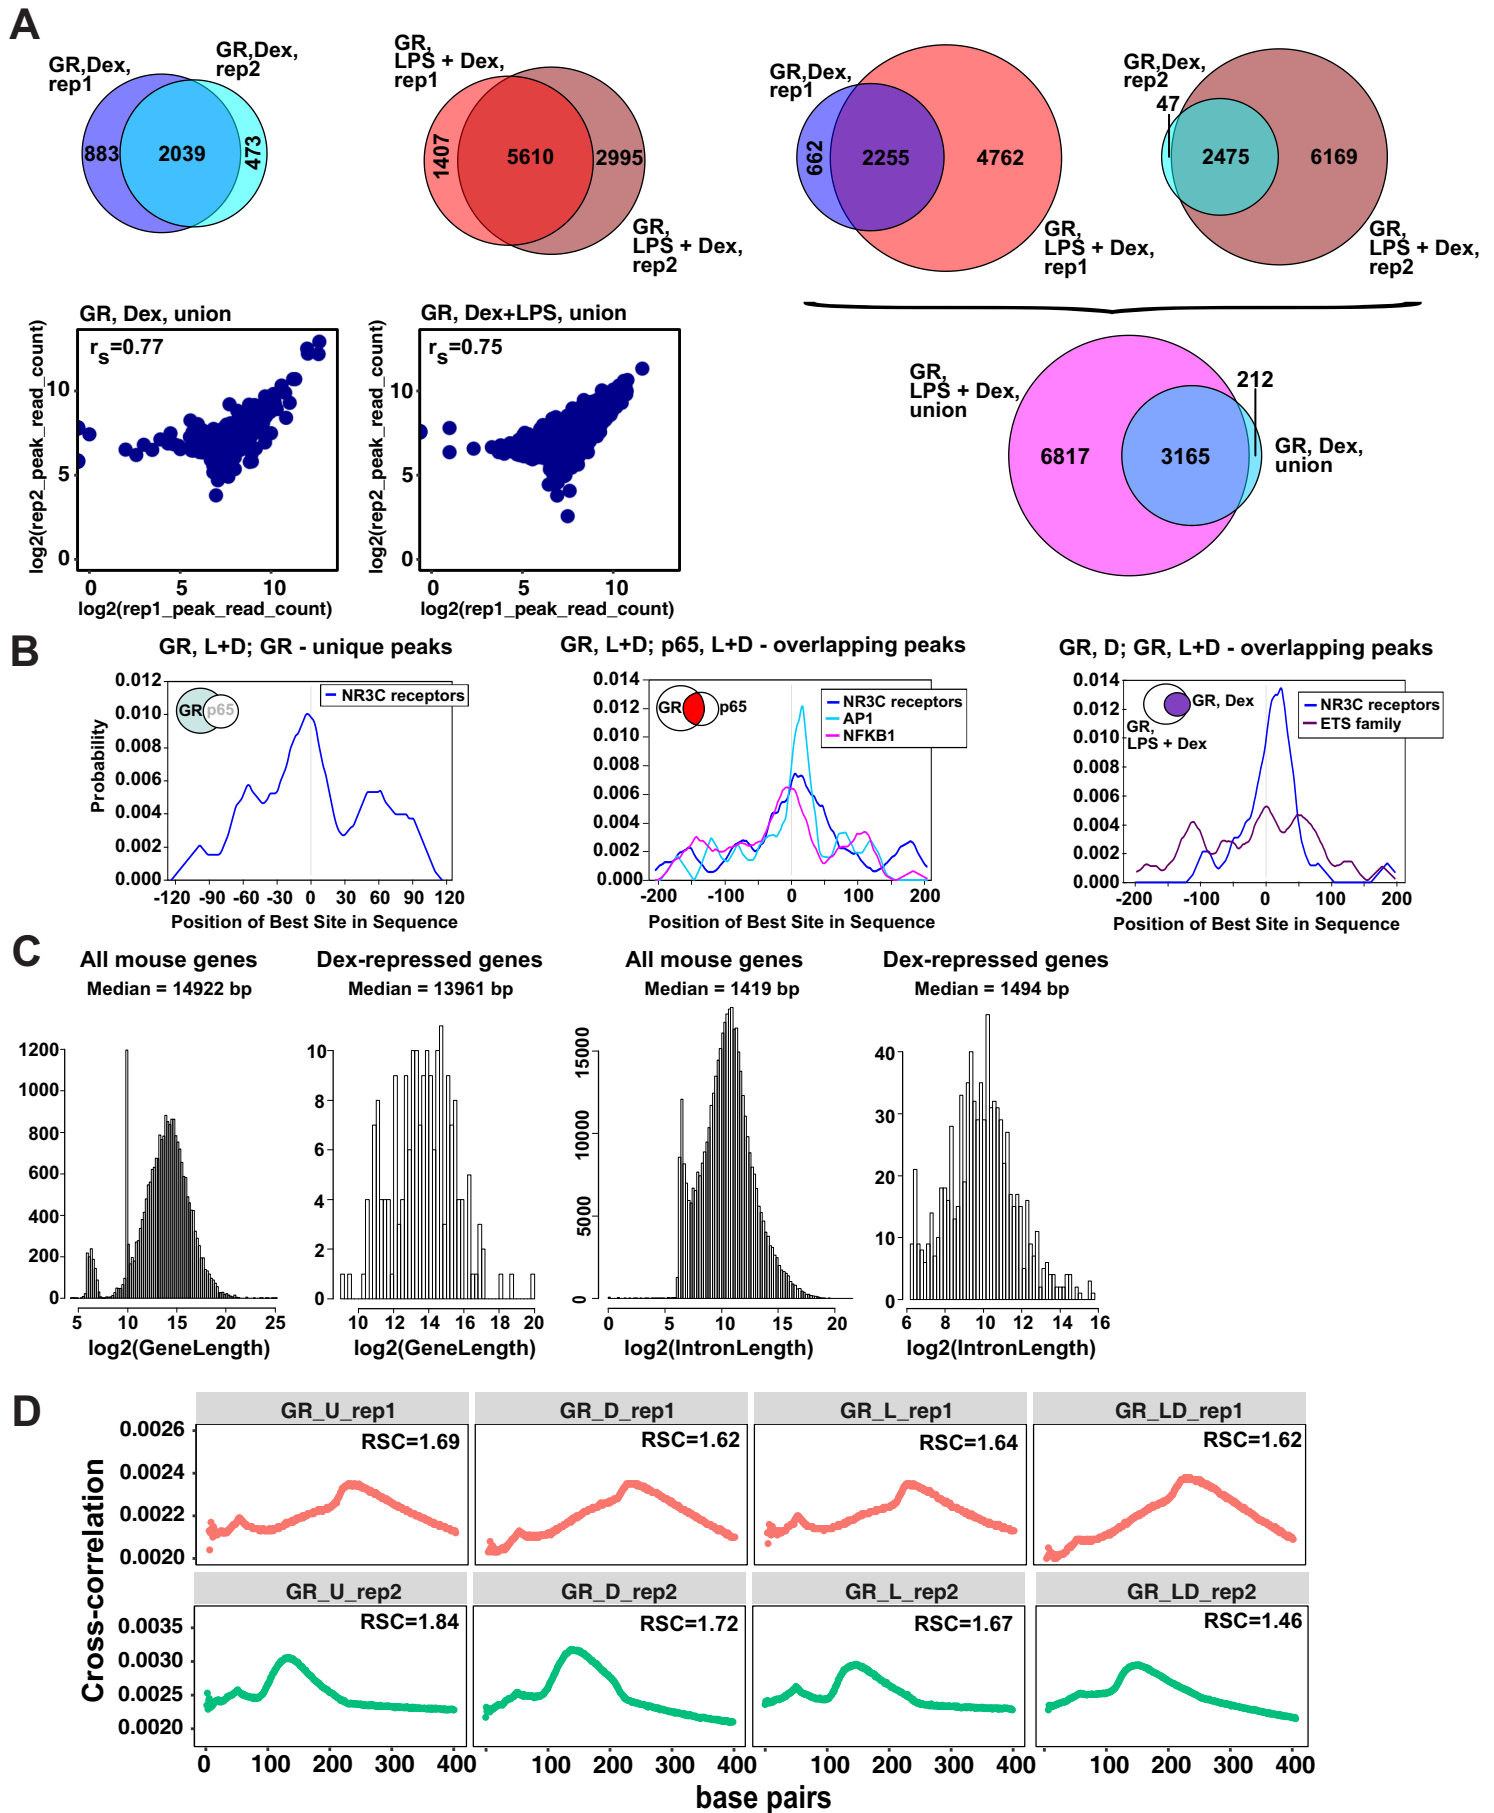

Supplement: supp [file elife-34864-supp-v1.zip]
